# Supplementary material for: Discovery of anaerobic lithoheterotrophic haloarchaea, ubiquitous in hypersaline habitats
Source: PubMed Central journal article supplement (PMC5437934; doi:10.1038/ismej.2016.203), 2017-01-20
Supplement: ismej2016203x2.pdf [file ismej2016203x2.pdf]

**Table S8** Detailed structure of the main unique islands detected in HTSR1 (yellow) and HSR6 (orange) genomes. Genes that match with similarity greater than 90% are highlighted in light green.

| Length (AA)                                 | Locus tag | Function                                                         | Locus tag  | AA similarity % | Function                                                                                                            |
|---------------------------------------------|-----------|------------------------------------------------------------------|------------|-----------------|---------------------------------------------------------------------------------------------------------------------|
| <b>HTSR1 UNIQUE ISLAND (A)</b>              |           |                                                                  |            |                 |                                                                                                                     |
| 108                                         | HTSR_0929 | hypothetical protein                                             | HSR6_0943  | 99.1            |                                                                                                                     |
| 334                                         | HTSR_0930 | phage integrase                                                  | HSR6_0952  | 40.06           | phage integrase                                                                                                     |
| 192                                         | HTSR_0931 | hypothetical protein                                             |            | 0               |                                                                                                                     |
| 78                                          | HTSR_0932 | hypothetical protein                                             |            | 0               |                                                                                                                     |
| 247                                         | HTSR_0933 | site-specific recombinase, DNA invertase Pin                     |            | 0               |                                                                                                                     |
| 1142                                        | HTSR_0934 | type II restriction enzyme, methylase subunits                   |            | 0               |                                                                                                                     |
| 124                                         | HTSR_0935 | hypothetical protein                                             |            | 0               |                                                                                                                     |
| 222                                         | HTSR_0936 | hypothetical protein                                             |            | 0               |                                                                                                                     |
| 321                                         | HTSR_0937 | hypothetical protein                                             |            | 0               |                                                                                                                     |
| 69                                          | HTSR_0938 | hypothetical protein                                             |            | 0               |                                                                                                                     |
| 605                                         | HTSR_0939 | hypothetical protein                                             |            | 0               |                                                                                                                     |
| 588                                         | HTSR_0940 | hypothetical protein                                             |            | 0               |                                                                                                                     |
| 474                                         | HTSR_0941 | hypothetical protein                                             |            | 0               |                                                                                                                     |
| 597                                         | HTSR_0942 | hypothetical protein                                             |            | 0               |                                                                                                                     |
| 120                                         | HTSR_0943 | hypothetical protein                                             |            | 0               |                                                                                                                     |
| 292                                         | HTSR_0944 | hypothetical protein                                             | HSR6_0945  | 97.83           | hypothetical protein                                                                                                |
| <b>HTSR6 UNIQUE ISLAND (B)</b>              |           |                                                                  |            |                 |                                                                                                                     |
| 987                                         | HSR6_0951 | PAS domain s-box                                                 | HTSR1_0951 | 99.8            |                                                                                                                     |
| 357                                         | HSR6_0952 | phage integrase                                                  | HTSR1_0930 | 40.06           | phage integrase                                                                                                     |
| 101                                         | HSR6_0953 | hypothetical protein                                             |            | 0               |                                                                                                                     |
| 58                                          | HSR6_0954 | hypothetical protein                                             |            | 0               |                                                                                                                     |
| 78                                          | HSR6_0955 | hypothetical protein                                             |            | 0               |                                                                                                                     |
| 82                                          | HSR6_0956 | phage repressor protein                                          |            | 0               |                                                                                                                     |
| 88                                          | HSR6_0957 | hypothetical protein                                             |            | 0               |                                                                                                                     |
| 483                                         | HSR6_0958 | competence protein                                               |            | 0               |                                                                                                                     |
| 178                                         | HSR6_0959 | hypothetical protein                                             |            | 0               |                                                                                                                     |
| <b>HTSR6 UNIQUE ISLAND (C)</b>              |           |                                                                  |            |                 |                                                                                                                     |
| 316                                         | HSR6_0960 | XerC/D-like integrase                                            | HTSR1_0961 | 26.49           | integrase/recombinase                                                                                               |
| 149                                         | HSR6_0961 | cytidine deaminase                                               | HTSR1_0786 | 34.62           | Cytidine deaminase (EC 3.5.4.5)                                                                                     |
| 59                                          | HSR6_0962 | hypothetical protein                                             |            | 0               |                                                                                                                     |
| 464                                         | HSR6_0963 | site-specific DNA-methyltransferase                              |            | 0               |                                                                                                                     |
| 248                                         | HSR6_0964 | hypothetical protein                                             |            | 0               |                                                                                                                     |
| 686                                         | HSR6_0965 | hypothetical protein                                             |            | 0               |                                                                                                                     |
| 493                                         | HSR6_0966 | dGTPase (EC 3.1.5.1)                                             |            | 0               |                                                                                                                     |
| 86                                          | HSR6_0967 | hypothetical protein                                             |            | 0               |                                                                                                                     |
| 449                                         | HSR6_0968 | DNA methylase                                                    |            | 0               |                                                                                                                     |
| 236                                         | HSR6_0969 | hypothetical protein                                             |            | 0               |                                                                                                                     |
| 583                                         | HSR6_0970 | hypothetical protein                                             |            | 0               |                                                                                                                     |
| 126                                         | HSR6_0971 | hypothetical protein                                             |            | 0               |                                                                                                                     |
| 146                                         | HSR6_0972 | hypothetical protein                                             |            | 0               |                                                                                                                     |
| 546                                         | HSR6_0973 | hypothetical protein                                             |            | 0               |                                                                                                                     |
| 272                                         | HSR6_0974 | hypothetical protein                                             |            | 0               |                                                                                                                     |
| 453                                         | HSR6_0975 | hypothetical protein                                             |            | 0               |                                                                                                                     |
| 81                                          | HSR6_0976 | hypothetical protein                                             |            | 0               |                                                                                                                     |
| 1034                                        | HSR6_0977 | hypothetical protein                                             |            | 0               |                                                                                                                     |
| 98                                          | HSR6_0978 | hypothetical protein                                             |            | 0               |                                                                                                                     |
| 431                                         | HSR6_0979 | hypothetical protein                                             |            | 0               |                                                                                                                     |
| 62                                          | HSR6_0980 | hypothetical protein                                             |            | 0               |                                                                                                                     |
| 104                                         | HSR6_0981 | hypothetical protein                                             |            | 0               |                                                                                                                     |
| 79                                          | HSR6_0982 | hypothetical protein                                             |            | 0               |                                                                                                                     |
| 483                                         | HSR6_0984 | DHH family phosphoesterase                                       | HTSR1_0953 | 100             |                                                                                                                     |
| <b>HSR6 UNIQUE ISLAND (D)</b>               |           |                                                                  |            |                 |                                                                                                                     |
| 525                                         | HSR6_1251 | ATP-dependent DNA helicase                                       | HTSR1_1724 | 58.44           | ATP-dependent DNA helicase pcrA (EC 3.6.1.-)                                                                        |
| 156                                         | HSR6_1252 | CRISPR-associated protein Cas6                                   |            | 0               |                                                                                                                     |
| 716                                         | HSR6_1253 | CRISPR-associated protein Cas8b/Csh1                             |            | 0               |                                                                                                                     |
| 342                                         | HSR6_1254 | CRISPR-associated protein Cas7/Csh2                              |            | 0               |                                                                                                                     |
| 141                                         | HSR6_1255 | CRISPR-associated protein Cas5                                   |            | 0               |                                                                                                                     |
| 707                                         | HSR6_1256 | CRISPR-associated helicase Cas3                                  |            | 0               |                                                                                                                     |
| 156                                         | HSR6_1257 | CRISPR-associated protein Cas4                                   |            | 0               |                                                                                                                     |
| 332                                         | HSR6_1258 | CRISPR-associated protein Cas1                                   |            | 0               |                                                                                                                     |
| 87                                          | HSR6_1259 | CRISPR-associated protein Cas2                                   |            | 0               |                                                                                                                     |
| 49                                          | HSR6_1260 | transposase                                                      |            | 0               |                                                                                                                     |
| 90                                          | HSR6_1261 | cell division control protein 6                                  | HTSR1_0404 | 60.61           | cell division control protein @ Cell division control protein                                                       |
| 233                                         | HSR6_1262 | hypothetical protein                                             |            | 0               |                                                                                                                     |
| 92                                          | HSR6_1263 | hypothetical protein                                             |            | 0               |                                                                                                                     |
| 706                                         | HSR6_1264 | archaeal DNA polymerase I (EC 2.7.7.7)                           | HTSR1_0400 | 70.88           | archaeal DNA polymerase I (EC 2.7.7.7)                                                                              |
| 71                                          | HSR6_1265 | hypothetical protein                                             |            | 0               |                                                                                                                     |
| 301                                         | HSR6_1266 | hypothetical protein                                             |            | 0               |                                                                                                                     |
| 275                                         | HSR6_1267 | hypothetical protein                                             |            | 0               |                                                                                                                     |
| 415                                         | HSR6_1268 | hypothetical protein                                             |            | 0               |                                                                                                                     |
| 1131                                        | HSR6_1269 | UvrD/REP helicase domain-containing protein                      |            | 0               |                                                                                                                     |
| 429                                         | HSR6_1270 | integrase                                                        |            | 0               |                                                                                                                     |
| 38                                          | HSR6_1271 | hypothetical protein                                             |            | 0               |                                                                                                                     |
| 41                                          | HSR6_1272 | integrase                                                        |            | 0               |                                                                                                                     |
| 173                                         | HSR6_1273 | hypothetical protein                                             | HTSR1_1203 | 90.2            | hypothetical protein                                                                                                |
| <b>HSR6 UNIQUE-DISCONTINUOUS ISLAND (E)</b> |           |                                                                  |            |                 |                                                                                                                     |
| 451                                         | HSR6_0605 | alpha-L-glutamate ligase, RimK family                            | HTSR1_0617 | 96.57           | Ribosomal protein S6 glutaminyl transferase                                                                         |
| -                                           | HSR6_0606 | tRNA-Glu                                                         | HTSR1_0618 | 100             |                                                                                                                     |
| 92                                          | HSR6_0607 | hypothetical protein                                             |            | 0               |                                                                                                                     |
| 86                                          | HSR6_0608 | hypothetical protein                                             |            | 0               |                                                                                                                     |
| 175                                         | HSR6_0609 | hypothetical protein                                             |            | 0               |                                                                                                                     |
| 101                                         | HSR6_0610 | hypothetical protein                                             |            | 0               |                                                                                                                     |
| 66                                          | HSR6_0611 | copper chaperone CopZ                                            |            | 0               |                                                                                                                     |
| 687                                         | HSR6_0612 | copper-translocating P-type ATPase CopB (EC 3.6.3.4)             | HTSR1_1157 | 36.38           | translocating ATPase (EC 3.6.3.3) (EC 3.6.3.5); Copper-translocating ATPase                                         |
| 91                                          | HSR6_0613 | hypothetical protein                                             |            | 0               |                                                                                                                     |
| 604                                         | HSR6_0614 | fructose-6-phosphate aminotransferase (isomerizing) (EC 2.3.1.4) | HTSR1_0882 | 51.71           | fructose-6-phosphate aminotransferase [isomerizing] (EC 2.3.1.4)                                                    |
| 227                                         | HSR6_0615 | hypothetical protein                                             | HTSR1_0910 | 41.38           | hypothetical protein                                                                                                |
| 185                                         | HSR6_0616 | hypothetical protein                                             |            | 0               |                                                                                                                     |
| 72                                          | HSR6_0617 | hypothetical protein                                             |            | 0               |                                                                                                                     |
| 92                                          | HSR6_0618 | transcriptional regulator                                        |            | 0               |                                                                                                                     |
| 50                                          | HSR6_0619 | hypothetical protein                                             |            | 0               |                                                                                                                     |
| 68                                          | HSR6_0620 | hypothetical protein                                             |            | 0               |                                                                                                                     |
| 239                                         | HSR6_0621 | hypothetical protein                                             |            | 0               |                                                                                                                     |
| 84                                          | HSR6_0622 | hypothetical protein                                             | HTSR1_0788 | 32.89           | hypothetical protein                                                                                                |
| 564                                         | HSR6_0623 | glucosamine-1-phosphate N-acetyltransferase (EC 2.7.2.3)         | HTSR1_0890 | 57.22           | glucosamine-1-phosphate N-acetyltransferase (EC 2.7.2.3) / Glucosamine-1-phosphate N-acetyltransferase (EC 2.7.2.3) |
| 447                                         | HSR6_0624 | phosphoglucosamine mutase (EC 5.4.2.10)                          | HTSR1_0097 | 35.03           | phosphoglucosamine mutase (EC 5.4.2.8) / Phosphoglucosamine mutase (EC 5.4.2.10)                                    |
| 115                                         | HSR6_0625 | NUDIX hydrolase                                                  |            | 0               |                                                                                                                     |

|     |           |                                                   |           |       |                                                          |
|-----|-----------|---------------------------------------------------|-----------|-------|----------------------------------------------------------|
| 88  | HSR6_0626 | hypothetical protein                              |           | 0     |                                                          |
| 376 | HSR6_0627 | hypothetical protein                              |           | 0     |                                                          |
| 456 | HSR6_0628 | nucleotide sugar dehydrogenase                    | HTSR_0878 | 30.23 | UDP-glucose dehydrogenase (EC 1.1.1.22)                  |
| 269 | HSR6_0629 | oxidoreductase                                    |           | 0     |                                                          |
| 323 | HSR6_0630 | polysaccharide deacetylase                        |           | 0     |                                                          |
| 400 | HSR6_0631 | ATP-grasp protein                                 |           | 0     |                                                          |
| 399 | HSR6_0632 | dTDP-4-dehydro-6-deoxyglucose aminotransferase    |           | 0     |                                                          |
| 722 | HSR6_0633 | hypothetical protein                              |           | 0     |                                                          |
| 327 | HSR6_0634 | hypothetical protein                              | HTSR_2027 | 31.49 | hypothetical protein                                     |
| 489 | HSR6_0635 | hypothetical protein                              |           | 0     |                                                          |
| 278 | HSR6_0636 | hypothetical protein                              |           | 0     |                                                          |
| 506 | HSR6_0637 | polysaccharide biosynthesis protein               |           | 0     |                                                          |
| 334 | HSR6_0638 | glycosyl transferase family 2                     | HTSR_0233 | 26.72 | Mycofactocin system glycosyltransferase                  |
| 654 | HSR6_0639 | hypothetical protein                              |           | 0     |                                                          |
| 70  | HSR6_0640 | SigmaK-factor processing regulatory protein BofA  | HTSR_0106 | 35.59 | hypothetical protein                                     |
| 217 | HSR6_0641 | HAD-superfamily hydrolase, subfamily IA, variant1 |           | 0     |                                                          |
| 373 | HSR6_0642 | carbamoyl phosphate synthase large subunit        |           | 0     |                                                          |
| 388 | HSR6_0643 | glycosyl transferase family 2                     | HTSR_1227 | 36.16 | glycosyl transferase, family 2                           |
| 257 | HSR6_0644 | hypothetical protein                              |           | 0     |                                                          |
| 164 | HSR6_0645 | hypothetical protein                              |           | 0     |                                                          |
| 367 | HSR6_0646 | dTDP-4-amino-4,6-dideoxygalactose transaminase    |           | 0     |                                                          |
| 187 | HSR6_0647 | transferase                                       | HTSR_0711 | 35.58 | acetyltransferase homolog                                |
| 434 | HSR6_0648 | arylsulfatase                                     | HTSR_2027 | 34.25 | hypothetical protein                                     |
| 311 | HSR6_0649 | glycosyl transferase family 1                     |           | 0     |                                                          |
| 642 | HSR6_0650 | hypothetical protein                              |           | 0     |                                                          |
| 167 | HSR6_0651 | hypothetical protein                              |           | 0     |                                                          |
| 315 | HSR6_0652 | UDP-glucose 4-epimerase (EC 5.1.3.2)              | HTSR_1766 | 37.14 | hypothetical protein                                     |
| 280 | HSR6_0653 | hypothetical protein                              | HTSR_0622 | 90.71 | hypothetical protein                                     |
| 61  | HSR6_0654 | arsenic resistance protein ArsB                   | HTSR_0623 | 76.74 | Arsenical-resistance protein ACR3                        |
| 47  | HSR6_0655 | ArsR family transcriptional regulator             | HTSR_0624 | 86.84 | Arsenical resistance operon repressor                    |
| 141 | HSR6_0656 | CoA-binding domain-containing protein             | HTSR_0631 | 100   | ulfhydrilase (EC 2.5.1.49) / O-succinylhomoserine sulfhy |
| 382 | HSR6_0657 | permease                                          | HTSR_0632 | 99.7  |                                                          |
