# Supplementary material for: Discovery of anaerobic lithoheterotrophic haloarchaea, ubiquitous in hypersaline habitats
Source: PubMed Central journal article supplement (PMC5437934; doi:10.1038/ismej.2016.203), 2017-01-20
Supplement: ismej2016203x4.pdf [file ismej2016203x4.pdf]

**Table S11** Proteome of *Halodesulfurarchaeum formicum* HTSR1, with abundance and relative abundance (%) of proteins detected in corresponding sulfur- (red), thiosulfate- (blue) and DMSO-respiring (green) cells.

| locus_tag | product                                                                                                    | S8        |                    |       | THIO      |                    |       | HTRS      |                    |       |
|-----------|------------------------------------------------------------------------------------------------------------|-----------|--------------------|-------|-----------|--------------------|-------|-----------|--------------------|-------|
|           |                                                                                                            | abundance | rel. abundance (%) | color | abundance | rel. abundance (%) | color | abundance | rel. abundance (%) | color |
| HTSR_0001 | orc1/cdc6 family replication initiation protein                                                            | 3         | 0.27%              | red   | 3         | 0.28%              | blue  | 15        | 0.359%             | green |
| HTSR_0002 | hypothetical protein                                                                                       | 0         | 0.00%              | red   | 0         | 0.00%              | blue  | 0         | 0.00%              | green |
| HTSR_0003 | hypothetical protein                                                                                       | 0         | 0.00%              | red   | 0         | 0.00%              | blue  | 0         | 0.00%              | green |
| HTSR_0004 | signal peptidase I                                                                                         | 3         | 0.27%              | red   | 3         | 0.28%              | blue  | 4         | 0.096%             | green |
| HTSR_0005 | DNA polymerase II small subunit                                                                            | 0         | 0.00%              | red   | 0         | 0.00%              | blue  | 3         | 0.072%             | green |
| HTSR_0006 | aspartate kinase                                                                                           | 9         | 0.82%              | red   | 11        | 1.04%              | blue  | 10        | 0.239%             | green |
| HTSR_0007 | radical SAM protein                                                                                        | 12        | 1.09%              | red   | 6         | 0.57%              | blue  | 2         | 0.048%             | green |
| HTSR_0008 | hypothetical protein                                                                                       | 0         | 0.00%              | red   | 0         | 0.00%              | blue  | 1         | 0.024%             | green |
| HTSR_0009 | hypothetical protein                                                                                       | 0         | 0.00%              | red   | 0         | 0.00%              | blue  | 0         | 0.00%              | green |
| HTSR_0010 | lipote-protein ligase A                                                                                    | 0         | 0.00%              | red   | 1         | 0.009%             | blue  | 1         | 0.024%             | green |
| HTSR_0011 | lipote synthase                                                                                            | 0         | 0.00%              | red   | 0         | 0.00%              | blue  | 2         | 0.048%             | green |
| HTSR_0012 | tryptophanase                                                                                              | 5         | 0.45%              | red   | 7         | 0.66%              | blue  | 8         | 0.191%             | green |
| HTSR_0013 | serine/threonine protein phosphatase                                                                       | 0         | 0.00%              | red   | 0         | 0.00%              | blue  | 0         | 0.00%              | green |
| HTSR_0014 | IMP cyclohydrolase                                                                                         | 0         | 0.00%              | red   | 0         | 0.00%              | blue  | 0         | 0.00%              | green |
| HTSR_0016 | hypothetical protein                                                                                       | 0         | 0.00%              | red   | 0         | 0.00%              | blue  | 0         | 0.00%              | green |
| HTSR_0017 | permease                                                                                                   | 0         | 0.00%              | red   | 0         | 0.00%              | blue  | 0         | 0.00%              | green |
| HTSR_0018 | universal stress protein UspA                                                                              | 0         | 0.00%              | red   | 0         | 0.00%              | blue  | 0         | 0.00%              | green |
| HTSR_0019 | hypothetical protein                                                                                       | 0         | 0.00%              | red   | 0         | 0.00%              | blue  | 0         | 0.00%              | green |
| HTSR_0020 | Na <sup>+</sup> /H <sup>+</sup> antiporter NhaC-like protein                                               | 1         | 0.009%             | red   | 1         | 0.009%             | blue  | 0         | 0.00%              | green |
| HTSR_0021 | amino acid permease-associated region                                                                      | 6         | 0.54%              | red   | 24        | 2.27%              | blue  | 5         | 0.120%             | green |
| HTSR_0022 | AsnC family transcriptional regulator                                                                      | 4         | 0.36%              | red   | 5         | 0.47%              | blue  | 4         | 0.096%             | green |
| HTSR_0023 | NADH dehydrogenase                                                                                         | 0         | 0.00%              | red   | 0         | 0.00%              | blue  | 0         | 0.00%              | green |
| HTSR_0024 | hypothetical protein                                                                                       | 6         | 0.54%              | red   | 6         | 0.57%              | blue  | 4         | 0.096%             | green |
| HTSR_0025 | phosphate transporter                                                                                      | 3         | 0.27%              | red   | 2         | 0.19%              | blue  | 2         | 0.048%             | green |
| HTSR_0026 | phosphate transporter                                                                                      | 0         | 0.00%              | red   | 0         | 0.00%              | blue  | 0         | 0.00%              | green |
| HTSR_0027 | universal stress protein UspA                                                                              | 10        | 0.91%              | red   | 25        | 2.36%              | blue  | 19        | 0.455%             | green |
| HTSR_0028 | tryptophan synthase, beta subunit                                                                          | 17        | 1.54%              | red   | 26        | 2.46%              | blue  | 16        | 0.383%             | green |
| HTSR_0029 | NADH-dependent flavin oxidoreductase                                                                       | 12        | 1.09%              | red   | 19        | 1.79%              | blue  | 10        | 0.239%             | green |
| HTSR_0030 | thymidylate synthase                                                                                       | 4         | 0.36%              | red   | 7         | 0.66%              | blue  | 3         | 0.072%             | green |
| HTSR_0031 | dihydrofolate reductase                                                                                    | 5         | 0.45%              | red   | 0         | 0.00%              | blue  | 1         | 0.024%             | green |
| HTSR_0032 | ferredoxin                                                                                                 | 3         | 0.27%              | red   | 2         | 0.19%              | blue  | 1         | 0.024%             | green |
| HTSR_0033 | spermidine synthase                                                                                        | 0         | 0.00%              | red   | 1         | 0.009%             | blue  | 6         | 0.144%             | green |
| HTSR_0034 | 3-hydroxy-3-methylglutaryl-coenzyme A reductase                                                            | 24        | 2.18%              | red   | 32        | 3.02%              | blue  | 16        | 0.383%             | green |
| HTSR_0035 | glutaredoxin                                                                                               | 20        | 1.81%              | red   | 16        | 1.51%              | blue  | 7         | 0.168%             | green |
| HTSR_0036 | hypothetical protein                                                                                       | 0         | 0.00%              | red   | 0         | 0.00%              | blue  | 0         | 0.00%              | green |
| HTSR_0037 | Uncharacterized protein MJ0187                                                                             | 3         | 0.27%              | red   | 0         | 0.00%              | blue  | 1         | 0.024%             | green |
| HTSR_0038 | DEAD/DEAH box helicase domain protein/Putative ski2-type helicase MJ1124                                   | 5         | 0.45%              | red   | 9         | 0.85%              | blue  | 13        | 0.311%             | green |
| HTSR_0039 | hypothetical protein                                                                                       | 5         | 0.45%              | red   | 6         | 0.57%              | blue  | 3         | 0.072%             | green |
| HTSR_0040 | universal stress protein UspA                                                                              | 3         | 0.27%              | red   | 5         | 0.47%              | blue  | 4         | 0.096%             | green |
| HTSR_0041 | Hef nuclease / ATP-dependent RNA helicase, EIF-4A family                                                   | 8         | 0.73%              | red   | 16        | 1.51%              | blue  | 18        | 0.431%             | green |
| HTSR_0042 | dolichol kinase                                                                                            | 0         | 0.00%              | red   | 0         | 0.00%              | blue  | 0         | 0.00%              | green |
| HTSR_0043 | glycyl-tRNA synthetase                                                                                     | 15        | 1.36%              | red   | 11        | 1.04%              | blue  | 13        | 0.311%             | green |
| HTSR_0044 | putative signal transduction protein with CBS domains                                                      | 14        | 1.27%              | red   | 17        | 1.61%              | blue  | 14        | 0.335%             | green |
| HTSR_0045 | hypothetical protein                                                                                       | 1         | 0.009%             | red   | 0         | 0.00%              | blue  | 1         | 0.024%             | green |
| HTSR_0046 | oligopeptide/dipeptide ABC transporter, ATPase subunit                                                     | 10        | 0.91%              | red   | 21        | 1.98%              | blue  | 20        | 0.479%             | green |
| HTSR_0047 | peptide ABC transporter substrate-binding protein / periplasmic substrate-binding component (TC 3.A.1.5.2) | 32        | 2.90%              | red   | 31        | 2.93%              | blue  | 24        | 0.574%             | green |
| HTSR_0048 | peptide ABC transporter permease DppB (TC 3.A.1.5.2)                                                       | 3         | 0.27%              | red   | 2         | 0.19%              | blue  | 1         | 0.024%             | green |
| HTSR_0049 | peptide ABC transporter permease DppC (TC 3.A.1.5.2)                                                       | 5         | 0.45%              | red   | 3         | 0.28%              | blue  | 3         | 0.072%             | green |
| HTSR_0050 | hypothetical protein                                                                                       | 0         | 0.00%              | red   | 0         | 0.00%              | blue  | 0         | 0.00%              | green |
| HTSR_0051 | hypothetical protein                                                                                       | 0         | 0.00%              | red   | 0         | 0.00%              | blue  | 0         | 0.00%              | green |
| HTSR_0052 | hypothetical protein                                                                                       | 1         | 0.009%             | red   | 0         | 0.00%              | blue  | 1         | 0.024%             | green |
| HTSR_0053 | DNA polymerase II large subunit                                                                            | 1         | 0.009%             | red   | 5         | 0.47%              | blue  | 9         | 0.215%             | green |
| HTSR_0054 | glycine/betaine ABC transporter                                                                            | 1         | 0.009%             | red   | 0         | 0.00%              | blue  | 0         | 0.00%              | green |
| HTSR_0055 | IcIR family transcriptional regulator                                                                      | 0         | 0.00%              | red   | 0         | 0.00%              | blue  | 6         | 0.144%             | green |
| HTSR_0056 | bacterio-opsin activator HTH domain-containing protein                                                     | 6         | 0.54%              | red   | 0         | 0.00%              | blue  | 2         | 0.048%             | green |
| HTSR_0057 | bacterio-opsin activator HTH domain-containing protein                                                     | 2         | 0.18%              | red   | 0         | 0.00%              | blue  | 0         | 0.00%              | green |
| HTSR_0058 | phosphoesterase RecJ domain-containing protein / Single-stranded-DNA-specific exonuclease RecJ (EC 3.1.--) | 0         | 0.00%              | red   | 0         | 0.00%              | blue  | 10        | 0.239%             | green |
| HTSR_0059 | uroporphyrinogen III methyltransferase                                                                     | 2         | 0.18%              | red   | 3         | 0.28%              | blue  | 3         | 0.072%             | green |
| HTSR_0060 | porphobilinogen deaminase                                                                                  | 15        | 1.36%              | red   | 22        | 2.08%              | blue  | 15        | 0.359%             | green |
| HTSR_0061 | glutamate-1-semialdehyde aminotransferase                                                                  | 5         | 0.45%              | red   | 8         | 0.76%              | blue  | 6         | 0.144%             | green |
| HTSR_0062 | glutamate-1-semialdehyde aminotransferase                                                                  | 4         | 0.36%              | red   | 6         | 0.57%              | blue  | 7         | 0.168%             | green |
| HTSR_0063 | hypothetical protein                                                                                       | 0         | 0.00%              | red   | 0         | 0.00%              | blue  | 0         | 0.00%              | green |
| HTSR_0064 | delta-aminolevulinic acid dehydratase / Porphobilinogen synthase (EC 4.2.1.24)                             | 17        | 1.54%              | red   | 13        | 1.23%              | blue  | 9         | 0.215%             | green |
| HTSR_0065 | Fe-S oxidoreductase                                                                                        | 18        | 1.63%              | red   | 34        | 3.21%              | blue  | 25        | 0.598%             | green |
| HTSR_0066 | hypothetical protein                                                                                       | 1         | 0.009%             | red   | 0         | 0.00%              | blue  | 0         | 0.00%              | green |
| HTSR_0067 | hypothetical protein                                                                                       | 0         | 0.00%              | red   | 0         | 0.00%              | blue  | 0         | 0.00%              | green |
| HTSR_0068 | Sua5/YciO/YrdC/YwIc family protein                                                                         | 2         | 0.18%              | red   | 1         | 0.009%             | blue  | 0         | 0.00%              | green |
| HTSR_0069 | hypothetical protein                                                                                       | 0         | 0.00%              | red   | 0         | 0.00%              | blue  | 0         | 0.00%              | green |
| HTSR_0070 | peroxiredoxin-like protein                                                                                 | 6         | 0.54%              | red   | 1         | 0.009%             | blue  | 2         | 0.048%             | green |
| HTSR_0071 | glutaredoxin / Glutathione S-transferase N-terminal domain                                                 | 6         | 0.54%              | red   | 2         | 0.19%              | blue  | 4         | 0.096%             | green |
| HTSR_0072 | hypothetical protein / Magnesium and cobalt efflux protein CorC                                            | 10        | 0.91%              | red   | 9         | 0.85%              | blue  | 10        | 0.239%             | green |
| HTSR_0073 | phosphate transporter                                                                                      | 1         | 0.009%             | red   | 1         | 0.009%             | blue  | 1         | 0.024%             | green |
| HTSR_0074 | hypothetical protein                                                                                       | 7         | 0.64%              | red   | 4         | 0.38%              | blue  | 2         | 0.048%             | green |
| HTSR_0075 | uracil phosphoribosyltransferase                                                                           | 6         | 0.54%              | red   | 10        | 0.94%              | blue  | 6         | 0.144%             | green |
| HTSR_0076 | hypothetical protein                                                                                       | 0         | 0.00%              | red   | 0         | 0.00%              | blue  | 0         | 0.00%              | green |
| HTSR_0077 | hypothetical protein / FIG000605; protein co-occurring with transport systems (COG1739)                    | 1         | 0.009%             | red   | 9         | 0.85%              | blue  | 15        | 0.359%             | green |
| HTSR_0078 | amino acid-binding ACT domain-containing protein                                                           | 8         | 0.73%              | red   | 4         | 0.38%              | blue  | 4         | 0.096%             | green |
| HTSR_0079 | imidazoleglycerol-phosphate dehydratase                                                                    | 2         | 0.18%              | red   | 4         | 0.38%              | blue  | 3         | 0.072%             | green |
| HTSR_0080 | phosphoribosylformimino-5-aminoimidazole carboxamide ribotide isomerase                                    | 2         | 0.18%              | red   | 11        | 1.04%              | blue  | 5         | 0.120%             | green |
| HTSR_0081 | ferredoxin                                                                                                 | 3         | 0.27%              | red   | 10        | 0.94%              | blue  | 2         | 0.048%             | green |
| HTSR_0082 | peptidase A24B, FlaK domain protein / Signal peptidase, type IV - prepilin/preflagellin                    | 3         | 0.27%              | red   | 3         | 0.28%              | blue  | 4         | 0.096%             | green |
| HTSR_0083 | phosphoribosyl-AMP cyclohydrolase                                                                          | 3         | 0.27%              | red   | 0         | 0.00%              | blue  | 1         | 0.024%             | green |
| HTSR_0084 | hypothetical protein                                                                                       | 24        | 2.18%              | red   | 13        | 1.23%              | blue  | 16        | 0.383%             | green |
| HTSR_0085 | MCM family protein                                                                                         | 15        | 1.36%              | red   | 15        | 1.42%              | blue  | 14        | 0.335%             | green |
| HTSR_0086 | hypothetical protein                                                                                       | 0         | 0.00%              | red   | 0         | 0.00%              | blue  | 1         | 0.024%             | green |
| HTSR_0087 | hypothetical protein                                                                                       | 0         | 0.00%              | red   | 0         | 0.00%              | blue  | 0         | 0.00%              | green |
| HTSR_0088 | hypothetical protein                                                                                       | 0         | 0.00%              | red   | 0         | 0.00%              | blue  | 0         | 0.00%              | green |
| HTSR_0089 | hypothetical protein                                                                                       | 0         | 0.00%              | red   | 0         | 0.00%              | blue  | 0         | 0.00%              | green |
| HTSR_0090 | cell division inhibitor MinD-like                                                                          | 0         | 0.00%              | red   | 0         | 0.00%              | blue  | 0         | 0.00%              | green |
| HTSR_0091 | transcription initiation factor TFB                                                                        | 0         | 0.00%              | red   | 0         | 0.00%              | blue  | 0         | 0.00%              | green |
| HTSR_0092 | hypothetical protein                                                                                       | 0         | 0.00%              | red   | 0         | 0.00%              | blue  | 0         | 0.00%              | green |
| HTSR_0093 | cell division inhibitor                                                                                    | 0         | 0.00%              | red   | 0         | 0.00%              | blue  | 0         | 0.00%              | green |
| HTSR_0094 | histidine triad (HIT) hydrolase                                                                            | 3         | 0.27%              | red   | 3         | 0.28%              | blue  | 0         | 0.00%              | green |
| HTSR_0095 | isoleucyl-tRNA synthetase                                                                                  | 31        | 2.81%              | red   | 28        | 2.65%              | blue  | 18        | 0.431%             | green |
| HTSR_0096 | ribose-phosphate pyrophosphokinase                                                                         | 9         | 0.82%              | red   | 15        | 1.42%              | blue  | 11        | 0.263%             | green |
| HTSR_0097 | phosphohexomutase (phosphoglucomutase)                                                                     | 8         | 0.73%              | red   | 19        | 1.79%              | blue  | 22        | 0.527%             | green |
| HTSR_0098 | iron (metal) dependent repressor, DtxR family                                                              | 7         | 0.64%              | red   | 8         | 0.76%              | blue  | 5         | 0.120%             | green |
| HTSR_0099 | hypothetical protein                                                                                       | 0         | 0.00%              | red   | 0         | 0.00%              | blue  | 0         | 0.00%              | green |
| HTSR_0100 | hypothetical protein                                                                                       | 2         | 0.18%              | red   | 3         | 0.28%              | blue  | 3         | 0.072%             | green |
| HTSR_0101 | hypothetical protein                                                                                       | 0         | 0.00%              | red   | 0         | 0.00%              | blue  | 0         | 0.00%              | green |
| HTSR_0102 | hypothetical protein                                                                                       | 0         | 0.00%              | red   | 0         | 0.00%              | blue  | 0         | 0.00%              | green |

|           |                                                                                         |    |    |    |        |        |        |
|-----------|-----------------------------------------------------------------------------------------|----|----|----|--------|--------|--------|
| HTSR_0103 | PilT domain-containing protein                                                          | 0  | 0  | 0  | 0,000% | 0,000% | 0,000% |
| HTSR_0104 | hypothetical protein                                                                    | 0  | 0  | 0  | 0,000% | 0,000% | 0,000% |
| HTSR_0106 | hypothetical protein                                                                    | 0  | 0  | 0  | 0,000% | 0,000% | 0,000% |
| HTSR_0107 | DEAD/DEAH box helicase domain protein / Archaea-specific Superfamily II helicase MJ1401 | 0  | 9  | 17 | 0,000% | 0,085% | 0,407% |
| HTSR_0108 | cupin domain-containing protein                                                         | 4  | 0  | 3  | 0,036% | 0,000% | 0,072% |
| HTSR_0109 | Zn-dependent protease                                                                   | 4  | 12 | 2  | 0,036% | 0,113% | 0,048% |
| HTSR_0110 | PAS/PAC sensor signal transduction histidine kinase                                     | 5  | 17 | 7  | 0,045% | 0,161% | 0,168% |
| HTSR_0112 | helicase                                                                                | 0  | 0  | 0  | 0,000% | 0,000% | 0,000% |
| HTSR_0113 | CopG family transcriptional regulator                                                   | 2  | 0  | 4  | 0,018% | 0,000% | 0,096% |
| HTSR_0114 | DNA-binding protein                                                                     | 17 | 5  | 8  | 0,154% | 0,047% | 0,191% |
| HTSR_0115 | replication factor A                                                                    | 24 | 19 | 16 | 0,218% | 0,179% | 0,383% |
| HTSR_0116 | hypothetical protein                                                                    | 0  | 0  | 1  | 0,000% | 0,000% | 0,024% |
| HTSR_0117 | DNA binding protein, Tfx family                                                         | 11 | 7  | 3  | 0,100% | 0,066% | 0,072% |
| HTSR_0118 | TRAM domain-containing protein                                                          | 1  | 1  | 0  | 0,009% | 0,009% | 0,000% |
| HTSR_0119 | iron ABC transporter permease                                                           | 0  | 0  | 0  | 0,000% | 0,000% | 0,000% |
| HTSR_0120 | iron ABC transporter substrate-binding protein                                          | 4  | 0  | 9  | 0,036% | 0,000% | 0,215% |
| HTSR_0121 | ABC transporter ATP-binding protein                                                     | 0  | 0  | 0  | 0,000% | 0,000% | 0,000% |
| HTSR_0122 | DNA-binding TFAR19-related protein                                                      | 8  | 3  | 5  | 0,073% | 0,028% | 0,120% |
| HTSR_0123 | histidyl-tRNA synthetase                                                                | 14 | 14 | 15 | 0,127% | 0,132% | 0,359% |
| HTSR_0124 | tRNA pseudouridine synthase A                                                           | 0  | 0  | 2  | 0,000% | 0,000% | 0,048% |
| HTSR_0125 | oligoendopeptidase F                                                                    | 15 | 21 | 10 | 0,136% | 0,198% | 0,239% |
| HTSR_0126 | acetyltransferase, N-acetylglutamate synthase                                           | 0  | 0  | 0  | 0,000% | 0,000% | 0,000% |
| HTSR_0127 | protoporphyrinogen oxidase                                                              | 12 | 14 | 13 | 0,109% | 0,132% | 0,311% |
| HTSR_0128 | radical SAM protein                                                                     | 3  | 9  | 6  | 0,027% | 0,085% | 0,144% |
| HTSR_0129 | glutamyl-tRNA reductase                                                                 | 4  | 1  | 19 | 0,036% | 0,009% | 0,455% |
| HTSR_0130 | proteasome-activating nucleotidase                                                      | 10 | 6  | 20 | 0,091% | 0,057% | 0,479% |
| HTSR_0131 | pyruvoyl-dependent arginine decarboxylase                                               | 0  | 1  | 0  | 0,000% | 0,009% | 0,000% |
| HTSR_0132 | hypothetical protein                                                                    | 1  | 0  | 0  | 0,009% | 0,000% | 0,000% |
| HTSR_0133 | hypothetical protein                                                                    | 0  | 0  | 0  | 0,000% | 0,000% | 0,000% |
| HTSR_0134 | translation initiation factor IF-2                                                      | 17 | 23 | 20 | 0,154% | 0,217% | 0,479% |
| HTSR_0135 | PRC-barrel domain protein                                                               | 5  | 8  | 4  | 0,045% | 0,076% | 0,096% |
| HTSR_0136 | nucleic acid-binding protein                                                            | 6  | 3  | 3  | 0,054% | 0,028% | 0,072% |
| HTSR_0137 | hypothetical protein                                                                    | 0  | 0  | 0  | 0,000% | 0,000% | 0,000% |
| HTSR_0138 | Glucose-6-phosphate isomerase                                                           | 11 | 15 | 9  | 0,100% | 0,142% | 0,215% |
| HTSR_0139 | hypothetical protein                                                                    | 0  | 0  | 0  | 0,000% | 0,000% | 0,000% |
| HTSR_0140 | hypothetical protein                                                                    | 0  | 0  | 0  | 0,000% | 0,000% | 0,000% |
| HTSR_0141 | preprotein translocase subunit SecF                                                     | 2  | 2  | 3  | 0,018% | 0,019% | 0,072% |
| HTSR_0142 | preprotein translocase subunit SecD                                                     | 15 | 16 | 7  | 0,136% | 0,151% | 0,168% |
| HTSR_0143 | ribonuclease HII                                                                        | 0  | 0  | 0  | 0,000% | 0,000% | 0,000% |
| HTSR_0144 | pseudouridylate synthase                                                                | 5  | 8  | 6  | 0,045% | 0,076% | 0,144% |
| HTSR_0145 | hypothetical protein                                                                    | 2  | 3  | 0  | 0,018% | 0,028% | 0,000% |
| HTSR_0146 | tRNA (pseudouridine-N1)-methyltransferase                                               | 2  | 9  | 9  | 0,018% | 0,085% | 0,215% |
| HTSR_0148 | hypothetical protein                                                                    | 0  | 0  | 3  | 0,000% | 0,000% | 0,072% |
| HTSR_0149 | hypothetical protein                                                                    | 0  | 0  | 1  | 0,000% | 0,000% | 0,024% |
| HTSR_0150 | PilT protein domain-containing protein                                                  | 0  | 0  | 0  | 0,000% | 0,000% | 0,000% |
| HTSR_0151 | hypothetical protein                                                                    | 0  | 0  | 0  | 0,000% | 0,000% | 0,000% |
| HTSR_0152 | hypothetical protein                                                                    | 0  | 0  | 2  | 0,000% | 0,000% | 0,048% |
| HTSR_0153 | transposase, IS200 like protein                                                         | 0  | 0  | 0  | 0,000% | 0,000% | 0,000% |
| HTSR_0154 | hypothetical protein                                                                    | 0  | 0  | 0  | 0,000% | 0,000% | 0,000% |
| HTSR_0155 | IS1341-type transposase                                                                 | 0  | 0  | 0  | 0,000% | 0,000% | 0,000% |
| HTSR_0156 | DNA-binding protein                                                                     | 0  | 0  | 0  | 0,000% | 0,000% | 0,000% |
| HTSR_0157 | membrane associated metalloprotease                                                     | 0  | 0  | 1  | 0,000% | 0,000% | 0,024% |
| HTSR_0158 | thiamine-monophosphate kinase                                                           | 1  | 2  | 3  | 0,009% | 0,019% | 0,072% |
| HTSR_0159 | 30S ribosomal protein S19e                                                              | 13 | 11 | 12 | 0,118% | 0,104% | 0,287% |
| HTSR_0160 | adenosylhomocysteinease                                                                 | 14 | 26 | 11 | 0,127% | 0,246% | 0,263% |
| HTSR_0161 | 5-methylthioadenosine/S-adenosylhomocysteine deaminase                                  | 11 | 11 | 13 | 0,100% | 0,104% | 0,311% |
| HTSR_0162 | ATP phosphoribosyltransferase                                                           | 16 | 21 | 16 | 0,145% | 0,198% | 0,383% |
| HTSR_0163 | TATA-box binding family protein                                                         | 5  | 12 | 8  | 0,045% | 0,113% | 0,191% |
| HTSR_0164 | RNA methylase                                                                           | 1  | 6  | 17 | 0,009% | 0,057% | 0,407% |
| HTSR_0165 | replication factor C small subunit 2                                                    | 4  | 3  | 7  | 0,036% | 0,028% | 0,168% |
| HTSR_0166 | ribonuclease Z                                                                          | 10 | 15 | 11 | 0,091% | 0,142% | 0,263% |
| HTSR_0167 | iron-sulfur cluster-binding protein FixX                                                | 2  | 1  | 1  | 0,018% | 0,009% | 0,024% |
| HTSR_0168 | FAD dependent oxidoreductase                                                            | 15 | 45 | 21 | 0,136% | 0,425% | 0,503% |
| HTSR_0169 | electron transfer flavoprotein subunit alpha                                            | 14 | 32 | 12 | 0,127% | 0,302% | 0,287% |
| HTSR_0170 | electron transfer flavoprotein subunit beta                                             | 5  | 14 | 5  | 0,045% | 0,132% | 0,120% |
| HTSR_0171 | hypothetical protein                                                                    | 0  | 3  | 7  | 0,000% | 0,028% | 0,168% |
| HTSR_0172 | tyrosyl-tRNA synthetase                                                                 | 8  | 10 | 13 | 0,073% | 0,094% | 0,311% |
| HTSR_0173 | arsenate reductase (glutaredoxin) ArsC                                                  | 0  | 0  | 0  | 0,000% | 0,000% | 0,000% |
| HTSR_0174 | translation initiation factor eIF-1A                                                    | 2  | 1  | 1  | 0,018% | 0,009% | 0,024% |
| HTSR_0175 | serine/threonine protein kinase                                                         | 2  | 1  | 5  | 0,018% | 0,009% | 0,120% |
| HTSR_0176 | RNA-processing protein                                                                  | 9  | 7  | 6  | 0,082% | 0,066% | 0,144% |
| HTSR_0177 | thermosome subunit alpha                                                                | 47 | 29 | 36 | 0,426% | 0,274% | 0,862% |
| HTSR_0178 | ornithine cyclodeaminase                                                                | 11 | 17 | 9  | 0,100% | 0,161% | 0,215% |
| HTSR_0179 | leucyl-tRNA synthetase                                                                  | 50 | 63 | 43 | 0,454% | 0,595% | 1,029% |
| HTSR_0180 | hsp20-type chaperone                                                                    | 10 | 18 | 5  | 0,091% | 0,170% | 0,120% |
| HTSR_0181 | Prephenate dehydratase                                                                  | 8  | 12 | 8  | 0,073% | 0,113% | 0,191% |
| HTSR_0182 | dihydrolipoamide dehydrogenase                                                          | 23 | 19 | 14 | 0,209% | 0,179% | 0,335% |
| HTSR_0183 | DEAD/DEAH box helicase                                                                  | 5  | 9  | 30 | 0,045% | 0,085% | 0,718% |
| HTSR_0184 | DNA topoisomerase I                                                                     | 0  | 0  | 0  | 0,000% | 0,000% | 0,000% |
| HTSR_0185 | tRNA-intron endonuclease                                                                | 4  | 17 | 22 | 0,036% | 0,161% | 0,527% |
| HTSR_0186 | tryptophanyl-tRNA synthetase                                                            | 6  | 12 | 6  | 0,054% | 0,113% | 0,144% |
| HTSR_0187 | phenylalanyl-tRNA synthetase subunit alpha                                              | 13 | 14 | 14 | 0,118% | 0,132% | 0,335% |
| HTSR_0188 | phenylalanyl-tRNA synthetase subunit beta                                               | 14 | 28 | 21 | 0,127% | 0,265% | 0,503% |
| HTSR_0189 | dihydroorotate dehydrogenase                                                            | 13 | 10 | 9  | 0,118% | 0,094% | 0,215% |
| HTSR_0190 | hypothetical protein                                                                    | 0  | 1  | 0  | 0,000% | 0,009% | 0,000% |
| HTSR_0191 | hypothetical protein                                                                    | 0  | 0  | 0  | 0,000% | 0,000% | 0,000% |
| HTSR_0192 | Non-histone chromosomal MC1 family protein                                              | 5  | 7  | 5  | 0,045% | 0,066% | 0,120% |
| HTSR_0197 | hypothetical protein                                                                    | 0  | 0  | 0  | 0,000% | 0,000% | 0,000% |
| HTSR_0198 | C4-dicarboxylate ABC transporter substrate-binding protein                              | 9  | 14 | 11 | 0,082% | 0,132% | 0,263% |
| HTSR_0199 | C4-dicarboxylate ABC transporter                                                        | 1  | 0  | 3  | 0,009% | 0,000% | 0,072% |
| HTSR_0200 | C4-dicarboxylate ABC transporter permease                                               | 7  | 8  | 5  | 0,064% | 0,076% | 0,120% |
| HTSR_0201 | hypothetical protein                                                                    | 0  | 0  | 7  | 0,000% | 0,000% | 0,168% |
| HTSR_0203 | hypothetical protein                                                                    | 0  | 0  | 0  | 0,000% | 0,000% | 0,000% |
| HTSR_0204 | hypothetical protein                                                                    | 4  | 2  | 0  | 0,036% | 0,019% | 0,000% |
| HTSR_0205 | hypothetical protein                                                                    | 0  | 1  | 1  | 0,000% | 0,009% | 0,024% |
| HTSR_0206 | chromosome segregation protein SMC                                                      | 24 | 24 | 28 | 0,218% | 0,227% | 0,670% |
| HTSR_0207 | hypothetical protein                                                                    | 7  | 3  | 2  | 0,064% | 0,028% | 0,048% |
| HTSR_0208 | orc1/cdc6 family replication initiation protein                                         | 0  | 0  | 3  | 0,000% | 0,000% | 0,072% |
| HTSR_0209 | amidase                                                                                 | 1  | 4  | 7  | 0,009% | 0,038% | 0,168% |
| HTSR_0210 | spermidine/putrescine-binding periplasmic protein potD                                  | 5  | 5  | 5  | 0,045% | 0,047% | 0,120% |
| HTSR_0211 | spermidine/putrescine ABC transporter ATPase component potA                             | 2  | 12 | 3  | 0,018% | 0,113% | 0,072% |
| HTSR_0212 | spermidine/putrescine ABC transporter permease component potB                           | 0  | 0  | 0  | 0,000% | 0,000% | 0,000% |
| HTSR_0213 | spermidine/putrescine ABC transporter permease component potC                           | 1  | 1  | 0  | 0,009% | 0,009% | 0,000% |
| HTSR_0214 | short-chain dehydrogenase/reductase SDR                                                 | 3  | 8  | 3  | 0,027% | 0,076% | 0,072% |
| HTSR_0215 | calcium-binding protein                                                                 | 0  | 0  | 1  | 0,000% | 0,000% | 0,024% |

|           |                                                                          |    |    |    |        |        |        |
|-----------|--------------------------------------------------------------------------|----|----|----|--------|--------|--------|
| HTSR_0216 | hypothetical protein / carboxymethylenebutenolidase-related protein      | 0  | 3  | 3  | 0,000% | 0,028% | 0,072% |
| HTSR_0217 | hypothetical protein                                                     | 0  | 0  | 0  | 0,000% | 0,000% | 0,000% |
| HTSR_0218 | hypothetical protein                                                     | 0  | 0  | 0  | 0,000% | 0,000% | 0,000% |
| HTSR_0219 | chromosome segregation protein SMC                                       | 26 | 27 | 19 | 0,236% | 0,255% | 0,455% |
| HTSR_0220 | hypothetical protein                                                     | 6  | 5  | 4  | 0,054% | 0,047% | 0,096% |
| HTSR_0221 | IcIR family transcriptional regulator                                    | 5  | 0  | 13 | 0,045% | 0,000% | 0,311% |
| HTSR_0222 | aldehyde dehydrogenase                                                   | 3  | 3  | 7  | 0,027% | 0,028% | 0,168% |
| HTSR_0223 | short-chain dehydrogenase/reductase SDR                                  | 17 | 13 | 8  | 0,154% | 0,123% | 0,191% |
| HTSR_0224 | NADH:flavin oxidoreductase/NADH oxidase                                  | 3  | 5  | 3  | 0,027% | 0,047% | 0,072% |
| HTSR_0225 | electron transfer flavoprotein subunit alpha                             | 1  | 0  | 0  | 0,009% | 0,000% | 0,000% |
| HTSR_0226 | FAD dependent oxidoreductase                                             | 0  | 0  | 6  | 0,000% | 0,000% | 0,144% |
| HTSR_0227 | 4Fe-4S ferredoxin                                                        | 0  | 0  | 0  | 0,000% | 0,000% | 0,000% |
| HTSR_0228 | electron transfer flavoprotein alpha/beta- subunit                       | 0  | 0  | 0  | 0,000% | 0,000% | 0,000% |
| HTSR_0229 | short-chain dehydrogenase/reductase SDR                                  | 0  | 0  | 2  | 0,000% | 0,000% | 0,048% |
| HTSR_0230 | NADH:flavin oxidoreductase/NADH oxidase                                  | 7  | 19 | 17 | 0,064% | 0,179% | 0,407% |
| HTSR_0231 | mycofactocin system protein MFB                                          | 0  | 0  | 0  | 0,000% | 0,000% | 0,000% |
| HTSR_0232 | mycofactocin radical SAM maturase                                        | 0  | 0  | 0  | 0,000% | 0,000% | 0,000% |
| HTSR_0233 | FkbM family methyltransferase                                            | 0  | 0  | 0  | 0,000% | 0,000% | 0,000% |
| HTSR_0234 | BCCT transporter                                                         | 0  | 0  | 0  | 0,000% | 0,000% | 0,000% |
| HTSR_0235 | creatinine amidohydrolase                                                | 1  | 0  | 0  | 0,009% | 0,000% | 0,000% |
| HTSR_0236 | hypothetical protein                                                     | 2  | 2  | 0  | 0,018% | 0,019% | 0,000% |
| HTSR_0237 | serine O-acetyltransferase                                               | 3  | 4  | 6  | 0,027% | 0,038% | 0,144% |
| HTSR_0238 | cytochrome oxidase subunit I                                             | 0  | 0  | 0  | 0,000% | 0,000% | 0,000% |
| HTSR_0239 | hypothetical protein                                                     | 0  | 0  | 0  | 0,000% | 0,000% | 0,000% |
| HTSR_0240 | ATPase                                                                   | 0  | 0  | 0  | 0,000% | 0,000% | 0,000% |
| HTSR_0241 | hypothetical protein                                                     | 0  | 0  | 0  | 0,000% | 0,000% | 0,000% |
| HTSR_0242 | Protein-L-isoaspartate(D-aspartate) O-methyltransferase                  | 0  | 0  | 4  | 0,000% | 0,000% | 0,096% |
| HTSR_0243 | hypothetical protein                                                     | 11 | 8  | 9  | 0,100% | 0,076% | 0,215% |
| HTSR_0244 | leucyl aminopeptidase (aminopeptidase T)                                 | 11 | 10 | 9  | 0,100% | 0,094% | 0,215% |
| HTSR_0245 | hypothetical protein                                                     | 0  | 0  | 0  | 0,000% | 0,000% | 0,000% |
| HTSR_0246 | glyceraldehyde-3-phosphate dehydrogenase                                 | 21 | 26 | 16 | 0,191% | 0,246% | 0,383% |
| HTSR_0247 | heat shock protein Hsp20                                                 | 6  | 5  | 2  | 0,054% | 0,047% | 0,048% |
| HTSR_0248 | RimK domain protein ATP-grasp / Coenzyme gamma-F420-2:L-glutamate ligase | 0  | 0  | 5  | 0,000% | 0,000% | 0,120% |
| HTSR_0249 | 50S ribosomal protein L10e                                               | 5  | 9  | 14 | 0,045% | 0,085% | 0,335% |
| HTSR_0250 | hypothetical protein                                                     | 10 | 15 | 4  | 0,091% | 0,142% | 0,096% |
| HTSR_0251 | RecA-superfamily ATPase                                                  | 1  | 6  | 10 | 0,009% | 0,057% | 0,239% |
| HTSR_0252 | hypothetical protein                                                     | 0  | 0  | 0  | 0,000% | 0,000% | 0,000% |
| HTSR_0253 | SNF family Na <sup>+</sup> -dependent transporter                        | 1  | 2  | 2  | 0,009% | 0,019% | 0,048% |
| HTSR_0254 | DNA methylase N-4/N-6 domain protein                                     | 0  | 7  | 7  | 0,000% | 0,066% | 0,168% |
| HTSR_0255 | TrkA-N domain protein                                                    | 3  | 14 | 11 | 0,027% | 0,132% | 0,263% |
| HTSR_0256 | phosphatidylethanolamine-binding protein                                 | 5  | 5  | 0  | 0,045% | 0,047% | 0,000% |
| HTSR_0257 | carbonic anhydrase                                                       | 3  | 2  | 3  | 0,027% | 0,019% | 0,072% |
| HTSR_0258 | hypothetical protein                                                     | 2  | 2  | 1  | 0,018% | 0,019% | 0,024% |
| HTSR_0259 | hypothetical protein                                                     | 0  | 0  | 0  | 0,000% | 0,000% | 0,000% |
| HTSR_0260 | hypothetical protein                                                     | 0  | 0  | 0  | 0,000% | 0,000% | 0,000% |
| HTSR_0261 | hypothetical protein                                                     | 0  | 0  | 0  | 0,000% | 0,000% | 0,000% |
| HTSR_0262 | ArsR family transcriptional regulator                                    | 0  | 0  | 0  | 0,000% | 0,000% | 0,000% |
| HTSR_0263 | hypothetical protein                                                     | 0  | 0  | 0  | 0,000% | 0,000% | 0,000% |
| HTSR_0264 | peptidase S49                                                            | 0  | 0  | 6  | 0,000% | 0,000% | 0,144% |
| HTSR_0265 | hypothetical protein                                                     | 0  | 0  | 0  | 0,000% | 0,000% | 0,000% |
| HTSR_0266 | hypothetical protein                                                     | 0  | 0  | 0  | 0,000% | 0,000% | 0,000% |
| HTSR_0268 | AIR synthase related protein domain protein                              | 3  | 5  | 5  | 0,027% | 0,047% | 0,120% |
| HTSR_0269 | DNA mismatch repair protein MutS                                         | 3  | 14 | 19 | 0,027% | 0,132% | 0,455% |
| HTSR_0270 | DNA mismatch repair protein MutL                                         | 2  | 5  | 9  | 0,018% | 0,047% | 0,215% |
| HTSR_0271 | FMN-binding domain protein                                               | 6  | 14 | 8  | 0,054% | 0,132% | 0,191% |
| HTSR_0272 | UBA/THIF-type NAD/FAD binding protein                                    | 8  | 9  | 5  | 0,073% | 0,085% | 0,120% |
| HTSR_0273 | cold-shock protein                                                       | 6  | 2  | 2  | 0,054% | 0,019% | 0,048% |
| HTSR_0274 | oxidoreductase (glycolate oxidase iron-sulfur subunit)                   | 0  | 11 | 6  | 0,000% | 0,104% | 0,144% |
| HTSR_0275 | CopG family transcriptional regulator                                    | 4  | 1  | 1  | 0,036% | 0,009% | 0,024% |
| HTSR_0276 | hypothetical protein                                                     | 0  | 0  | 0  | 0,000% | 0,000% | 0,000% |
| HTSR_0277 | branched-chain amino acid aminotransferase                               | 36 | 34 | 29 | 0,327% | 0,321% | 0,694% |
| HTSR_0278 | hypothetical protein                                                     | 1  | 4  | 1  | 0,009% | 0,038% | 0,024% |
| HTSR_0279 | hypothetical protein                                                     | 0  | 0  | 0  | 0,000% | 0,000% | 0,000% |
| HTSR_0280 | orotate phosphoribosyltransferase                                        | 5  | 7  | 6  | 0,045% | 0,066% | 0,144% |
| HTSR_0281 | adenine phosphoribosyltransferase                                        | 10 | 8  | 8  | 0,091% | 0,076% | 0,191% |
| HTSR_0282 | xanthine/uracil permease family transport protein                        | 1  | 1  | 1  | 0,009% | 0,009% | 0,024% |
| HTSR_0283 | hypothetical protein                                                     | 1  | 2  | 7  | 0,009% | 0,019% | 0,168% |
| HTSR_0284 | threonyl-tRNA synthetase                                                 | 31 | 38 | 29 | 0,281% | 0,359% | 0,694% |
| HTSR_0285 | transcriptional regulator / Phage shock protein A                        | 23 | 17 | 19 | 0,209% | 0,161% | 0,455% |
| HTSR_0286 | CTP synthase                                                             | 15 | 16 | 16 | 0,136% | 0,151% | 0,383% |
| HTSR_0287 | GMP synthase subunit B                                                   | 16 | 24 | 24 | 0,145% | 0,227% | 0,574% |
| HTSR_0288 | hypothetical protein                                                     | 4  | 4  | 4  | 0,036% | 0,038% | 0,096% |
| HTSR_0289 | hypothetical protein / CRISPR repeat RNA endoribonuclease Cas6           | 8  | 21 | 9  | 0,073% | 0,198% | 0,215% |
| HTSR_0290 | glyoxalase/bleomycin resistance protein/dioxygenase                      | 15 | 12 | 9  | 0,136% | 0,113% | 0,215% |
| HTSR_0291 | molybdenum cofactor biosynthesis protein MoaB                            | 4  | 5  | 1  | 0,036% | 0,047% | 0,024% |
| HTSR_0292 | isopentenyl-diphosphate delta-isomerase                                  | 4  | 7  | 5  | 0,036% | 0,066% | 0,120% |
| HTSR_0293 | AsnC family transcriptional regulator                                    | 0  | 0  | 3  | 0,000% | 0,000% | 0,072% |
| HTSR_0294 | carbamoyl-phosphate synthase, small subunit                              | 7  | 0  | 5  | 0,064% | 0,000% | 0,120% |
| HTSR_0295 | hypothetical protein                                                     | 12 | 14 | 3  | 0,109% | 0,132% | 0,072% |
| HTSR_0296 | carbamoyl-phosphate synthase large subunit                               | 36 | 34 | 21 | 0,327% | 0,321% | 0,503% |
| HTSR_0297 | hypothetical protein                                                     | 0  | 0  | 0  | 0,000% | 0,000% | 0,000% |
| HTSR_0298 | aminodeoxychorismate lyase                                               | 12 | 19 | 13 | 0,109% | 0,179% | 0,311% |
| HTSR_0299 | para-aminobenzoate synthetase component II                               | 4  | 3  | 1  | 0,036% | 0,028% | 0,024% |
| HTSR_0300 | para-aminobenzoate synthetase component I                                | 15 | 22 | 16 | 0,136% | 0,208% | 0,383% |
| HTSR_0301 | hypothetical protein                                                     | 3  | 5  | 5  | 0,027% | 0,047% | 0,120% |
| HTSR_0302 | hypothetical protein                                                     | 3  | 4  | 5  | 0,027% | 0,038% | 0,120% |
| HTSR_0303 | NAD(P)H-nitrite reductase                                                | 40 | 41 | 29 | 0,363% | 0,387% | 0,694% |
| HTSR_0304 | metallo-beta-lactamase superfamily protein                               | 1  | 2  | 1  | 0,009% | 0,019% | 0,024% |
| HTSR_0305 | zinc finger CDGSH-type domain-containing protein                         | 1  | 3  | 0  | 0,009% | 0,028% | 0,000% |
| HTSR_0306 | protoporphyrinogen oxidase                                               | 6  | 8  | 10 | 0,054% | 0,076% | 0,239% |
| HTSR_0307 | CBS-domain-containing membrane protein                                   | 28 | 2  | 29 | 0,254% | 0,019% | 0,694% |
| HTSR_0308 | hypothetical protein                                                     | 1  | 1  | 0  | 0,009% | 0,009% | 0,000% |
| HTSR_0309 | AbrB family transcriptional regulator                                    | 0  | 0  | 1  | 0,000% | 0,000% | 0,024% |
| HTSR_0310 | IS1341-type transposase                                                  | 0  | 0  | 4  | 0,000% | 0,000% | 0,096% |
| HTSR_0311 | DNA repair and recombination protein RadB                                | 0  | 0  | 15 | 0,000% | 0,000% | 0,359% |
| HTSR_0312 | cell division cycle protein CdcH                                         | 43 | 47 | 27 | 0,390% | 0,444% | 0,646% |
| HTSR_0313 | 30S ribosomal protein S8e                                                | 14 | 8  | 14 | 0,127% | 0,076% | 0,335% |
| HTSR_0314 | hypothetical protein                                                     | 0  | 0  | 0  | 0,000% | 0,000% | 0,000% |
| HTSR_0315 | hypothetical protein                                                     | 2  | 5  | 3  | 0,018% | 0,047% | 0,072% |
| HTSR_0316 | orotidine 5-phosphate decarboxylase                                      | 4  | 7  | 4  | 0,036% | 0,066% | 0,096% |
| HTSR_0317 | IS1341-type transposase                                                  | 0  | 0  | 2  | 0,000% | 0,000% | 0,048% |
| HTSR_0318 | GTP-binding protein                                                      | 1  | 0  | 6  | 0,009% | 0,000% | 0,144% |
| HTSR_0319 | Phytoene synthase                                                        | 1  | 0  | 4  | 0,009% | 0,000% | 0,096% |
| HTSR_0320 | carotene biosynthesis associated membrane protein                        | 1  | 0  | 0  | 0,009% | 0,000% | 0,000% |
| HTSR_0321 | UbiA prenyltransferase Lycopene elongase (EC 2.5.1.-)                    | 0  | 1  | 1  | 0,000% | 0,009% | 0,024% |

|           |                                                             |    |    |    |        |        |        |
|-----------|-------------------------------------------------------------|----|----|----|--------|--------|--------|
| HTSR_0322 | phytoene desaturase                                         | 13 | 30 | 12 | 0,118% | 0,283% | 0,287% |
| HTSR_0323 | methenyltetrahydromethanopterin cyclohydrolase              | 9  | 16 | 9  | 0,082% | 0,151% | 0,215% |
| HTSR_0324 | hypothetical protein                                        | 6  | 6  | 3  | 0,054% | 0,057% | 0,072% |
| HTSR_0325 | hypothetical protein                                        | 1  | 0  | 3  | 0,009% | 0,000% | 0,072% |
| HTSR_0326 | hypothetical protein                                        | 2  | 5  | 0  | 0,018% | 0,047% | 0,000% |
| HTSR_0327 | hypothetical protein                                        | 1  | 1  | 1  | 0,009% | 0,009% | 0,024% |
| HTSR_0329 | hypothetical protein                                        | 1  | 2  | 1  | 0,009% | 0,019% | 0,024% |
| HTSR_0330 | hypothetical protein                                        | 1  | 3  | 9  | 0,009% | 0,028% | 0,215% |
| HTSR_0331 | 50S ribosomal protein L3                                    | 14 | 10 | 18 | 0,127% | 0,094% | 0,431% |
| HTSR_0332 | 50S ribosomal protein L4                                    | 19 | 16 | 19 | 0,172% | 0,151% | 0,455% |
| HTSR_0333 | 50S ribosomal protein L23                                   | 6  | 2  | 2  | 0,054% | 0,019% | 0,048% |
| HTSR_0334 | 50S ribosomal protein L2                                    | 13 | 14 | 21 | 0,118% | 0,132% | 0,503% |
| HTSR_0335 | 30S ribosomal protein S19                                   | 8  | 6  | 12 | 0,073% | 0,057% | 0,287% |
| HTSR_0336 | 50S ribosomal protein L22                                   | 9  | 3  | 4  | 0,082% | 0,028% | 0,096% |
| HTSR_0337 | 30S ribosomal protein S3                                    | 19 | 11 | 16 | 0,172% | 0,104% | 0,383% |
| HTSR_0338 | 50S ribosomal protein L29                                   | 4  | 3  | 5  | 0,036% | 0,028% | 0,120% |
| HTSR_0339 | Ribonuclease P, Rpp29                                       | 0  | 0  | 2  | 0,000% | 0,000% | 0,048% |
| HTSR_0340 | 30S ribosomal protein S17                                   | 6  | 5  | 7  | 0,054% | 0,047% | 0,168% |
| HTSR_0341 | 50S ribosomal protein L14                                   | 10 | 14 | 20 | 0,091% | 0,132% | 0,479% |
| HTSR_0342 | 50S ribosomal protein L24                                   | 9  | 5  | 8  | 0,082% | 0,047% | 0,191% |
| HTSR_0343 | 30S ribosomal protein S4e                                   | 17 | 6  | 9  | 0,154% | 0,057% | 0,215% |
| HTSR_0344 | 50S ribosomal protein L5                                    | 6  | 9  | 4  | 0,054% | 0,085% | 0,096% |
| HTSR_0345 | 30S ribosomal protein S14                                   | 2  | 3  | 5  | 0,018% | 0,028% | 0,120% |
| HTSR_0346 | 30S ribosomal protein S8                                    | 9  | 5  | 10 | 0,082% | 0,047% | 0,239% |
| HTSR_0347 | 50S ribosomal protein L6                                    | 13 | 8  | 9  | 0,118% | 0,076% | 0,215% |
| HTSR_0348 | 50S ribosomal protein L32e                                  | 12 | 11 | 14 | 0,109% | 0,104% | 0,335% |
| HTSR_0349 | 50S ribosomal protein L19e                                  | 16 | 13 | 15 | 0,145% | 0,123% | 0,359% |
| HTSR_0350 | 50S ribosomal protein L18                                   | 6  | 9  | 13 | 0,054% | 0,085% | 0,311% |
| HTSR_0351 | 30S ribosomal protein S5                                    | 12 | 10 | 21 | 0,109% | 0,094% | 0,503% |
| HTSR_0352 | 50S ribosomal protein L30                                   | 10 | 7  | 5  | 0,091% | 0,066% | 0,120% |
| HTSR_0353 | 50S ribosomal protein L15                                   | 6  | 5  | 9  | 0,054% | 0,047% | 0,215% |
| HTSR_0354 | preprotein translocase subunit SecY                         | 5  | 7  | 7  | 0,045% | 0,066% | 0,168% |
| HTSR_0355 | amidohydrolase                                              | 3  | 12 | 14 | 0,027% | 0,113% | 0,335% |
| HTSR_0356 | hypothetical protein                                        | 0  | 1  | 0  | 0,000% | 0,009% | 0,000% |
| HTSR_0357 | potassium transport system protein TrkH                     | 1  | 4  | 0  | 0,009% | 0,038% | 0,000% |
| HTSR_0358 | TrkA-N domain protein                                       | 6  | 4  | 1  | 0,054% | 0,038% | 0,024% |
| HTSR_0359 | hypothetical protein                                        | 0  | 0  | 0  | 0,000% | 0,000% | 0,000% |
| HTSR_0360 | AsnC family transcriptional regulator                       | 4  | 7  | 6  | 0,036% | 0,066% | 0,144% |
| HTSR_0361 | universal stress protein UspA                               | 9  | 10 | 4  | 0,082% | 0,094% | 0,096% |
| HTSR_0362 | phosphate permease                                          | 8  | 7  | 9  | 0,073% | 0,066% | 0,215% |
| HTSR_0363 | DNA repair helicase                                         | 4  | 2  | 10 | 0,036% | 0,019% | 0,239% |
| HTSR_0364 | oxidoreductase                                              | 1  | 13 | 16 | 0,009% | 0,123% | 0,383% |
| HTSR_0365 | hypothetical protein                                        | 0  | 0  | 0  | 0,000% | 0,000% | 0,000% |
| HTSR_0366 | hypothetical protein                                        | 0  | 0  | 0  | 0,000% | 0,000% | 0,000% |
| HTSR_0367 | TrkA-C domain-containing protein                            | 2  | 1  | 1  | 0,018% | 0,009% | 0,024% |
| HTSR_0368 | sodium/hydrogen exchanger                                   | 0  | 1  | 1  | 0,000% | 0,009% | 0,024% |
| HTSR_0369 | major facilitator superfamily MFS_1                         | 1  | 1  | 0  | 0,009% | 0,009% | 0,000% |
| HTSR_0370 | hypothetical protein                                        | 0  | 1  | 0  | 0,000% | 0,009% | 0,000% |
| HTSR_0371 | putative transporter component                              | 0  | 1  | 0  | 0,000% | 0,009% | 0,000% |
| HTSR_0372 | fused rhodanese domain-containing protein/hydrolase         | 12 | 8  | 7  | 0,109% | 0,076% | 0,168% |
| HTSR_0373 | hypothetical protein                                        | 1  | 1  | 0  | 0,009% | 0,009% | 0,000% |
| HTSR_0374 | ABC transporter                                             | 0  | 2  | 3  | 0,000% | 0,019% | 0,072% |
| HTSR_0375 | hypothetical protein                                        | 0  | 6  | 2  | 0,000% | 0,057% | 0,048% |
| HTSR_0376 | metal-dependent hydrolase                                   | 0  | 0  | 0  | 0,000% | 0,000% | 0,000% |
| HTSR_0377 | dipeptidase                                                 | 3  | 14 | 1  | 0,027% | 0,132% | 0,024% |
| HTSR_0378 | hypothetical protein                                        | 0  | 0  | 1  | 0,000% | 0,000% | 0,024% |
| HTSR_0379 | homoserine kinase                                           | 2  | 2  | 5  | 0,018% | 0,019% | 0,120% |
| HTSR_0380 | 3-isopropylmalate dehydrogenase                             | 10 | 16 | 8  | 0,091% | 0,151% | 0,191% |
| HTSR_0381 | 3-isopropylmalate dehydratase small subunit                 | 13 | 4  | 7  | 0,118% | 0,038% | 0,168% |
| HTSR_0382 | 3-isopropylmalate dehydratase large subunit                 | 14 | 0  | 14 | 0,127% | 0,000% | 0,335% |
| HTSR_0383 | ketol-acid reductoisomerase                                 | 19 | 27 | 12 | 0,172% | 0,255% | 0,287% |
| HTSR_0384 | acetolactate synthase small subunit                         | 9  | 18 | 12 | 0,082% | 0,170% | 0,287% |
| HTSR_0385 | acetolactate synthase large subunit                         | 6  | 4  | 7  | 0,054% | 0,038% | 0,168% |
| HTSR_0386 | pyruvate carboxyltransferase                                | 2  | 0  | 5  | 0,018% | 0,000% | 0,120% |
| HTSR_0387 | hypothetical protein                                        | 0  | 0  | 1  | 0,000% | 0,000% | 0,024% |
| HTSR_0388 | hypothetical protein                                        | 0  | 0  | 0  | 0,000% | 0,000% | 0,000% |
| HTSR_0389 | ATPase AAA / Nitric oxide reductase activation protein NorQ | 0  | 0  | 4  | 0,000% | 0,000% | 0,096% |
| HTSR_0390 | von Willebrand factor type A                                | 0  | 0  | 3  | 0,000% | 0,000% | 0,072% |
| HTSR_0391 | signal-transducing histidine kinase                         | 6  | 12 | 11 | 0,054% | 0,113% | 0,263% |
| HTSR_0392 | PAS domain s-box                                            | 0  | 5  | 6  | 0,000% | 0,047% | 0,144% |
| HTSR_0393 | hypothetical protein                                        | 4  | 1  | 4  | 0,036% | 0,009% | 0,096% |
| HTSR_0394 | Na <sup>+</sup> /solute symporter                           | 6  | 1  | 1  | 0,054% | 0,009% | 0,024% |
| HTSR_0395 | hypothetical protein                                        | 0  | 0  | 0  | 0,000% | 0,000% | 0,000% |
| HTSR_0396 | DNA primase                                                 | 9  | 11 | 5  | 0,082% | 0,104% | 0,120% |
| HTSR_0397 | conserved hypothetical membrane protein (DUF92)             | 1  | 1  | 0  | 0,009% | 0,009% | 0,000% |
| HTSR_0398 | undecaprenyl diphosphate synthase                           | 3  | 5  | 6  | 0,027% | 0,047% | 0,144% |
| HTSR_0399 | cell division protein FtsZ                                  | 0  | 0  | 0  | 0,000% | 0,000% | 0,000% |
| HTSR_0400 | DNA-directed DNA polymerase                                 | 0  | 0  | 0  | 0,000% | 0,000% | 0,000% |
| HTSR_0401 | hypothetical protein                                        | 0  | 0  | 0  | 0,000% | 0,000% | 0,000% |
| HTSR_0402 | hypothetical protein                                        | 0  | 0  | 0  | 0,000% | 0,000% | 0,000% |
| HTSR_0403 | putative metal-dependent membrane protease                  | 0  | 0  | 0  | 0,000% | 0,000% | 0,000% |
| HTSR_0404 | orc1/cdc6 family replication initiation protein             | 0  | 0  | 3  | 0,000% | 0,000% | 0,072% |
| HTSR_0405 | glutathione S-transferase                                   | 7  | 5  | 10 | 0,064% | 0,047% | 0,239% |
| HTSR_0406 | hypothetical protein                                        | 5  | 3  | 3  | 0,045% | 0,028% | 0,072% |
| HTSR_0407 | undecaprenyl diphosphate synthase                           | 1  | 0  | 1  | 0,009% | 0,000% | 0,024% |
| HTSR_0408 | hypothetical protein                                        | 3  | 2  | 4  | 0,027% | 0,019% | 0,096% |
| HTSR_0409 | pterin-4- $\alpha$ -carbinolamine dehydratase               | 1  | 2  | 1  | 0,009% | 0,019% | 0,024% |
| HTSR_0410 | hypothetical protein                                        | 0  | 0  | 0  | 0,000% | 0,000% | 0,000% |
| HTSR_0411 | molybdenum cofactor biosynthesis protein MoeA               | 3  | 7  | 5  | 0,027% | 0,066% | 0,120% |
| HTSR_0412 | heat shock protein Hsp20                                    | 3  | 5  | 4  | 0,027% | 0,047% | 0,096% |
| HTSR_0413 | membrane protein                                            | 16 | 38 | 23 | 0,145% | 0,359% | 0,551% |
| HTSR_0414 | aspartate transaminase                                      | 14 | 10 | 9  | 0,127% | 0,094% | 0,215% |
| HTSR_0415 | translation initiation factor eIF-5A                        | 11 | 7  | 6  | 0,100% | 0,066% | 0,144% |
| HTSR_0416 | agmatinase                                                  | 0  | 1  | 0  | 0,000% | 0,009% | 0,000% |
| HTSR_0417 | dinuclear metal center protein, YbgJ/SA1388 family          | 2  | 8  | 2  | 0,018% | 0,076% | 0,048% |
| HTSR_0418 | carboxymuconolactone decarboxylase                          | 1  | 3  | 0  | 0,009% | 0,028% | 0,000% |
| HTSR_0419 | deoxyhypusine synthase                                      | 9  | 5  | 5  | 0,082% | 0,047% | 0,120% |
| HTSR_0420 | hypothetical protein                                        | 2  | 0  | 0  | 0,018% | 0,000% | 0,000% |
| HTSR_0421 | bacterio-opsin activator HTH domain-containing protein      | 0  | 0  | 1  | 0,000% | 0,000% | 0,024% |
| HTSR_0422 | 4Fe-4S ferredoxin iron-sulfur binding domain protein        | 0  | 0  | 0  | 0,000% | 0,000% | 0,000% |
| HTSR_0423 | dimethylsulfoxide reductase                                 | 1  | 5  | 1  | 0,009% | 0,047% | 0,024% |
| HTSR_0424 | molybdopterin oxidoreductase                                | 0  | 0  | 0  | 0,000% | 0,000% | 0,000% |
| HTSR_0425 | polysulfide reductase NrfD                                  | 0  | 0  | 0  | 0,000% | 0,000% | 0,000% |
| HTSR_0426 | chaperone protein TorD                                      | 0  | 0  | 0  | 0,000% | 0,000% | 0,000% |
| HTSR_0427 | ion transporter                                             | 0  | 3  | 0  | 0,000% | 0,028% | 0,000% |



|           |                                                                        |    |    |    |        |        |        |
|-----------|------------------------------------------------------------------------|----|----|----|--------|--------|--------|
| HTSR_0428 | zinc/iron permease                                                     | 0  | 0  | 0  | 0,000% | 0,000% | 0,000% |
| HTSR_0429 | hypothetical protein / Magnesium and cobalt efflux protein CorC        | 7  | 12 | 5  | 0,064% | 0,113% | 0,120% |
| HTSR_0430 | hypothetical protein                                                   | 0  | 0  | 0  | 0,000% | 0,000% | 0,000% |
| HTSR_0431 | hypothetical protein                                                   | 2  | 4  | 0  | 0,018% | 0,038% | 0,000% |
| HTSR_0432 | cationic amino acid transporter                                        | 0  | 2  | 0  | 0,000% | 0,019% | 0,000% |
| HTSR_0433 | universal stress protein UspA                                          | 0  | 3  | 1  | 0,000% | 0,028% | 0,024% |
| HTSR_0434 | malate dehydrogenase                                                   | 26 | 29 | 18 | 0,236% | 0,274% | 0,431% |
| HTSR_0435 | DMT family permease                                                    | 0  | 3  | 8  | 0,000% | 0,028% | 0,191% |
| HTSR_0436 | pyridoxamine 5'-phosphate oxidase                                      | 5  | 1  | 2  | 0,045% | 0,009% | 0,048% |
| HTSR_0437 | translation initiation factor aIF-1A                                   | 3  | 1  | 3  | 0,027% | 0,009% | 0,072% |
| HTSR_0438 | FAD dependent oxidoreductase                                           | 16 | 28 | 12 | 0,145% | 0,265% | 0,287% |
| HTSR_0439 | HAD-superfamily hydrolase                                              | 1  | 0  | 7  | 0,009% | 0,000% | 0,168% |
| HTSR_0440 | DNA-directed RNA-polymerase subunit M                                  | 0  | 0  | 0  | 0,000% | 0,000% | 0,000% |
| HTSR_0441 | hypothetical protein                                                   | 2  | 1  | 0  | 0,018% | 0,009% | 0,000% |
| HTSR_0442 | hypothetical protein / Vng1740c                                        | 6  | 2  | 5  | 0,054% | 0,019% | 0,120% |
| HTSR_0443 | RecA-superfamily ATPase                                                | 1  | 9  | 5  | 0,009% | 0,085% | 0,120% |
| HTSR_0444 | GYD family protein                                                     | 2  | 2  | 2  | 0,018% | 0,019% | 0,048% |
| HTSR_0445 | phage PhiH1 repressor protein                                          | 8  | 5  | 6  | 0,073% | 0,047% | 0,144% |
| HTSR_0446 | formate/nitrite transporter                                            | 13 | 21 | 14 | 0,118% | 0,198% | 0,335% |
| HTSR_0447 | 3-oxoacyl-ACP reductase                                                | 3  | 10 | 0  | 0,027% | 0,094% | 0,000% |
| HTSR_0448 | nicotinate-nucleotide--dimethylbenzimidazole phosphoribosyltransferase | 7  | 0  | 5  | 0,064% | 0,000% | 0,120% |
| HTSR_0449 | methyl-accepting chemotaxis sensory transducer                         | 20 | 27 | 15 | 0,181% | 0,255% | 0,359% |
| HTSR_0450 | chemotaxis protein CheW                                                | 0  | 0  | 0  | 0,000% | 0,000% | 0,000% |
| HTSR_0451 | methyl-accepting chemotaxis sensory transducer with Pas/Pac sensor     | 3  | 1  | 1  | 0,027% | 0,009% | 0,024% |
| HTSR_0452 | PAS/PAC sensor signal transduction histidine kinase                    | 0  | 0  | 1  | 0,000% | 0,000% | 0,024% |
| HTSR_0453 | hypothetical protein                                                   | 0  | 0  | 2  | 0,000% | 0,000% | 0,048% |
| HTSR_0454 | sodium-dependent phosphate transporter                                 | 0  | 0  | 0  | 0,000% | 0,000% | 0,000% |
| HTSR_0456 | tRNA pseudouridine synthase B                                          | 4  | 5  | 6  | 0,036% | 0,047% | 0,144% |
| HTSR_0457 | cytidylate kinase                                                      | 10 | 12 | 5  | 0,091% | 0,113% | 0,120% |
| HTSR_0458 | HTR-like protein                                                       | 10 | 9  | 7  | 0,091% | 0,085% | 0,168% |
| HTSR_0459 | adenylate kinase                                                       | 6  | 9  | 4  | 0,054% | 0,085% | 0,096% |
| HTSR_0460 | hypothetical protein                                                   | 6  | 4  | 1  | 0,054% | 0,038% | 0,024% |
| HTSR_0461 | potassium transporter TrkH                                             | 3  | 0  | 2  | 0,027% | 0,000% | 0,048% |
| HTSR_0462 | potassium transporter TrkA                                             | 4  | 10 | 9  | 0,036% | 0,094% | 0,215% |
| HTSR_0463 | hypothetical protein                                                   | 1  | 2  | 1  | 0,009% | 0,019% | 0,024% |
| HTSR_0464 | molecular chaperone Hsp20                                              | 0  | 0  | 0  | 0,000% | 0,000% | 0,000% |
| HTSR_0465 | hypothetical protein                                                   | 0  | 0  | 0  | 0,000% | 0,000% | 0,000% |
| HTSR_0466 | hypothetical protein                                                   | 1  | 1  | 1  | 0,009% | 0,009% | 0,024% |
| HTSR_0467 | ArsR family transcriptional regulator                                  | 0  | 1  | 0  | 0,000% | 0,009% | 0,000% |
| HTSR_0468 | hypothetical protein                                                   | 0  | 0  | 0  | 0,000% | 0,000% | 0,000% |
| HTSR_0469 | signal transduction histidine kinase                                   | 0  | 2  | 1  | 0,000% | 0,019% | 0,024% |
| HTSR_0470 | PAS sensor histidine kinase                                            | 1  | 5  | 8  | 0,009% | 0,047% | 0,191% |
| HTSR_0471 | methyl-accepting chemotaxis sensory transducer with Pas/Pac sensor     | 28 | 14 | 10 | 0,254% | 0,132% | 0,239% |
| HTSR_0472 | chemotaxis protein CheW                                                | 6  | 0  | 5  | 0,054% | 0,000% | 0,120% |
| HTSR_0473 | signal-transducing histidine kinase                                    | 0  | 0  | 0  | 0,000% | 0,000% | 0,000% |
| HTSR_0474 | hypothetical protein                                                   | 0  | 0  | 0  | 0,000% | 0,000% | 0,000% |
| HTSR_0475 | alcohol dehydrogenase GroES domain protein                             | 0  | 0  | 0  | 0,000% | 0,000% | 0,000% |
| HTSR_0477 | anthranilate phosphoribosyltransferase                                 | 0  | 0  | 2  | 0,000% | 0,000% | 0,048% |
| HTSR_0478 | phosphoribosylanthranilate isomerase                                   | 9  | 1  | 1  | 0,082% | 0,009% | 0,024% |
| HTSR_0479 | anthranilate synthase, aminase component                               | 11 | 0  | 16 | 0,100% | 0,000% | 0,383% |
| HTSR_0480 | anthranilate synthase, amidotransferase component                      | 2  | 0  | 0  | 0,018% | 0,000% | 0,000% |
| HTSR_0481 | ribonucleoside-diphosphate reductase                                   | 27 | 33 | 57 | 0,245% | 0,312% | 1,364% |
| HTSR_0482 | hypothetical protein                                                   | 0  | 0  | 0  | 0,000% | 0,000% | 0,000% |
| HTSR_0483 | hypothetical protein                                                   | 8  | 11 | 9  | 0,073% | 0,104% | 0,215% |
| HTSR_0485 | multi-sensor signal transduction histidine kinase                      | 0  | 0  | 2  | 0,000% | 0,000% | 0,048% |
| HTSR_0486 | RDD domain containing protein                                          | 0  | 0  | 0  | 0,000% | 0,000% | 0,000% |
| HTSR_0487 | hypothetical protein                                                   | 0  | 0  | 0  | 0,000% | 0,000% | 0,000% |
| HTSR_0488 | oxidoreductase (aldo-keto reductase)                                   | 16 | 16 | 16 | 0,145% | 0,151% | 0,383% |
| HTSR_0489 | GCN5-like N-acetyltransferase                                          | 6  | 6  | 4  | 0,054% | 0,057% | 0,096% |
| HTSR_0490 | DMT(drug/metabolite transporter) superfamily permease                  | 0  | 0  | 1  | 0,000% | 0,000% | 0,024% |
| HTSR_0491 | inosine-5'-monophosphate dehydrogenase                                 | 6  | 5  | 2  | 0,054% | 0,047% | 0,048% |
| HTSR_0492 | hypothetical protein                                                   | 1  | 0  | 2  | 0,009% | 0,000% | 0,048% |
| HTSR_0493 | malate dehydrogenase (oxaloacetate-decarboxylating)(NADP+)             | 29 | 35 | 35 | 0,263% | 0,331% | 0,838% |
| HTSR_0494 | ATPase AAA                                                             | 7  | 11 | 14 | 0,064% | 0,104% | 0,335% |
| HTSR_0495 | acetyltransferase                                                      | 4  | 1  | 1  | 0,036% | 0,009% | 0,024% |
| HTSR_0496 | transcriptional regulator                                              | 7  | 1  | 11 | 0,064% | 0,009% | 0,263% |
| HTSR_0497 | Hydroxymethylglutaryl-CoA synthase                                     | 35 | 54 | 53 | 0,318% | 0,510% | 1,269% |
| HTSR_0498 | PKD domain-containing protein                                          | 6  | 3  | 4  | 0,054% | 0,028% | 0,096% |
| HTSR_0499 | hypothetical protein                                                   | 9  | 6  | 7  | 0,082% | 0,057% | 0,168% |
| HTSR_0500 | NAD(P)H-flavin oxidoreductase                                          | 3  | 2  | 4  | 0,027% | 0,019% | 0,096% |
| HTSR_0501 | TatD-related deoxyribonuclease                                         | 0  | 2  | 1  | 0,000% | 0,019% | 0,024% |
| HTSR_0502 | hypothetical protein                                                   | 2  | 0  | 1  | 0,018% | 0,000% | 0,024% |
| HTSR_0503 | glycine cleavage system protein T                                      | 13 | 33 | 6  | 0,118% | 0,312% | 0,144% |
| HTSR_0504 | glycine cleavage system protein H                                      | 2  | 3  | 2  | 0,018% | 0,028% | 0,048% |
| HTSR_0505 | glycine dehydrogenase subunit 1                                        | 22 | 31 | 13 | 0,200% | 0,293% | 0,311% |
| HTSR_0506 | glycine dehydrogenase subunit 2                                        | 33 | 34 | 16 | 0,299% | 0,321% | 0,383% |
| HTSR_0507 | HxIR family transcriptional regulator                                  | 3  | 1  | 3  | 0,027% | 0,009% | 0,072% |
| HTSR_0508 | hypothetical protein                                                   | 2  | 3  | 0  | 0,018% | 0,028% | 0,000% |
| HTSR_0509 | glutaredoxin                                                           | 2  | 4  | 1  | 0,018% | 0,038% | 0,024% |
| HTSR_0510 | ATP:cob(I)alamin adenosyltransferase                                   | 2  | 2  | 2  | 0,018% | 0,019% | 0,048% |
| HTSR_0512 | Appr-1-p processing protein                                            | 0  | 0  | 0  | 0,000% | 0,000% | 0,000% |
| HTSR_0513 | hypothetical protein                                                   | 0  | 1  | 0  | 0,000% | 0,009% | 0,000% |
| HTSR_0514 | chaperone protein TorD                                                 | 0  | 0  | 6  | 0,000% | 0,000% | 0,144% |
| HTSR_0515 | polysulfide reductase NrfD                                             | 0  | 5  | 9  | 0,000% | 0,047% | 0,215% |
| HTSR_0516 | 4Fe-4S ferredoxin iron-sulfur binding domain protein                   | 0  | 5  | 18 | 0,000% | 0,047% | 0,431% |
| HTSR_0517 | dimethylsulfide reductase                                              | 1  | 25 | 87 | 0,009% | 0,236% | 2,082% |
| HTSR_0518 | hypothetical protein                                                   | 0  | 0  | 1  | 0,000% | 0,000% | 0,024% |
| HTSR_0519 | hypothetical protein                                                   | 0  | 0  | 0  | 0,000% | 0,000% | 0,000% |
| HTSR_0520 | bacterio-opsin activator HTH domain-containing protein                 | 0  | 0  | 6  | 0,000% | 0,000% | 0,144% |
| HTSR_0521 | major facilitator superfamily MFS_1                                    | 0  | 0  | 0  | 0,000% | 0,000% | 0,000% |
| HTSR_0522 | peptidylprolyl isomerase                                               | 4  | 3  | 3  | 0,036% | 0,028% | 0,072% |
| HTSR_0523 | 2-dehydro-3-deoxyglucarate aldolase                                    | 1  | 2  | 3  | 0,009% | 0,019% | 0,072% |
| HTSR_0525 | quinoxemoprotein alcohol dehydrogenase                                 | 2  | 1  | 1  | 0,018% | 0,009% | 0,024% |
| HTSR_0526 | hypothetical protein                                                   | 0  | 0  | 0  | 0,000% | 0,000% | 0,000% |
| HTSR_0527 | hypothetical protein                                                   | 1  | 0  | 0  | 0,009% | 0,000% | 0,000% |
| HTSR_0528 | succinyl-CoA synthetase subunit alpha                                  | 6  | 7  | 8  | 0,054% | 0,066% | 0,191% |
| HTSR_0529 | succinyl-CoA synthetase subunit beta                                   | 10 | 17 | 13 | 0,091% | 0,161% | 0,311% |
| HTSR_0530 | zinc-binding dehydrogenase                                             | 3  | 0  | 5  | 0,027% | 0,000% | 0,120% |
| HTSR_0531 | glucose 1-dehydrogenase                                                | 7  | 7  | 5  | 0,064% | 0,066% | 0,120% |
| HTSR_0532 | universal stress protein UspA                                          | 4  | 4  | 1  | 0,036% | 0,038% | 0,024% |
| HTSR_0533 | nucleoside deaminase (cytosine deaminase, guanine deaminase)           | 2  | 9  | 5  | 0,018% | 0,085% | 0,120% |
| HTSR_0534 | HD family metal dependent phosphohydrolase                             | 6  | 6  | 14 | 0,054% | 0,057% | 0,335% |
| HTSR_0535 | 2-phospho-L-lactate transferase                                        | 0  | 0  | 1  | 0,000% | 0,000% | 0,024% |
| HTSR_0536 | tRNA dihydrouridine synthase B-like protein                            | 0  | 0  | 0  | 0,000% | 0,000% | 0,000% |
| HTSR_0537 | 30S ribosomal protein S17e                                             | 0  | 4  | 7  | 0,000% | 0,038% | 0,168% |

|           |                                                                                                                             |    |    |    |        |        |        |
|-----------|-----------------------------------------------------------------------------------------------------------------------------|----|----|----|--------|--------|--------|
| HTSR_0538 | aspartate-semialdehyde dehydrogenase                                                                                        | 26 | 11 | 15 | 0,236% | 0,104% | 0,359% |
| HTSR_0539 | D-3-phosphoglycerate dehydrogenase                                                                                          | 9  | 11 | 10 | 0,082% | 0,104% | 0,239% |
| HTSR_0540 | hypothetical protein                                                                                                        | 0  | 0  | 1  | 0,000% | 0,000% | 0,024% |
| HTSR_0541 | hypothetical protein                                                                                                        | 0  | 0  | 0  | 0,000% | 0,000% | 0,000% |
| HTSR_0542 | bacterio-opsin activator HTH domain-containing protein                                                                      | 3  | 4  | 4  | 0,027% | 0,038% | 0,096% |
| HTSR_0543 | hypothetical protein                                                                                                        | 0  | 1  | 1  | 0,000% | 0,009% | 0,024% |
| HTSR_0544 | hypothetical protein                                                                                                        | 9  | 12 | 7  | 0,082% | 0,113% | 0,168% |
| HTSR_0545 | hypothetical protein                                                                                                        | 0  | 0  | 0  | 0,000% | 0,000% | 0,000% |
| HTSR_0546 | hypothetical protein                                                                                                        | 6  | 3  | 11 | 0,054% | 0,028% | 0,263% |
| HTSR_0547 | hypothetical protein                                                                                                        | 0  | 0  | 0  | 0,000% | 0,000% | 0,000% |
| HTSR_0548 | molybdenum-pterin-binding protein                                                                                           | 0  | 1  | 2  | 0,000% | 0,009% | 0,048% |
| HTSR_0549 | hypothetical protein                                                                                                        | 0  | 0  | 1  | 0,000% | 0,000% | 0,024% |
| HTSR_0550 | AzI C family protein                                                                                                        | 0  | 0  | 2  | 0,000% | 0,000% | 0,048% |
| HTSR_0551 | hypothetical protein                                                                                                        | 1  | 0  | 0  | 0,009% | 0,000% | 0,000% |
| HTSR_0552 | hypothetical protein                                                                                                        | 1  | 0  | 0  | 0,009% | 0,000% | 0,000% |
| HTSR_0553 | universal stress protein UspA                                                                                               | 0  | 0  | 0  | 0,000% | 0,000% | 0,000% |
| HTSR_0554 | hypothetical protein                                                                                                        | 9  | 0  | 8  | 0,082% | 0,000% | 0,191% |
| HTSR_0555 | histidinol dehydrogenase                                                                                                    | 13 | 23 | 20 | 0,118% | 0,217% | 0,479% |
| HTSR_0556 | hypothetical protein                                                                                                        | 1  | 2  | 2  | 0,009% | 0,019% | 0,048% |
| HTSR_0557 | hypothetical protein                                                                                                        | 0  | 1  | 0  | 0,000% | 0,009% | 0,000% |
| HTSR_0558 | hypothetical protein                                                                                                        | 1  | 3  | 2  | 0,009% | 0,028% | 0,048% |
| HTSR_0559 | membrane-bound metal-dependent hydrolase                                                                                    | 0  | 0  | 0  | 0,000% | 0,000% | 0,000% |
| HTSR_0560 | translation initiation factor aIF-2B                                                                                        | 15 | 25 | 18 | 0,136% | 0,236% | 0,431% |
| HTSR_0561 | hypothetical protein                                                                                                        | 10 | 21 | 11 | 0,091% | 0,198% | 0,263% |
| HTSR_0562 | hypothetical protein                                                                                                        | 1  | 3  | 0  | 0,009% | 0,028% | 0,000% |
| HTSR_0563 | GCN5-like N-acetyltransferase                                                                                               | 2  | 8  | 14 | 0,018% | 0,076% | 0,335% |
| HTSR_0564 | DNA primase small subunit                                                                                                   | 2  | 7  | 7  | 0,018% | 0,066% | 0,168% |
| HTSR_0565 | hypothetical protein                                                                                                        | 2  | 0  | 1  | 0,018% | 0,000% | 0,024% |
| HTSR_0566 | ATPase AAA                                                                                                                  | 56 | 71 | 41 | 0,508% | 0,671% | 0,981% |
| HTSR_0567 | hypothetical protein                                                                                                        | 0  | 0  | 0  | 0,000% | 0,000% | 0,000% |
| HTSR_0568 | 3-methyl-2-oxobutanoate hydroxymethyltransferase                                                                            | 1  | 6  | 1  | 0,009% | 0,057% | 0,024% |
| HTSR_0569 | hypothetical protein                                                                                                        | 0  | 0  | 0  | 0,000% | 0,000% | 0,000% |
| HTSR_0570 | alanyl-tRNA synthetase                                                                                                      | 15 | 10 | 9  | 0,136% | 0,094% | 0,215% |
| HTSR_0571 | transcriptional regulator                                                                                                   | 2  | 1  | 2  | 0,018% | 0,009% | 0,048% |
| HTSR_0572 | MCP domain-containing signal transducer                                                                                     | 28 | 24 | 22 | 0,254% | 0,227% | 0,527% |
| HTSR_0573 | Na <sup>+</sup> /Ca <sup>2+</sup> -antiporter-like protein                                                                  | 0  | 0  | 0  | 0,000% | 0,000% | 0,000% |
| HTSR_0574 | ATPase, P-type (transporting), HAD superfamily, subfamily IC                                                                | 0  | 8  | 0  | 0,000% | 0,076% | 0,000% |
| HTSR_0575 | hypothetical protein                                                                                                        | 0  | 0  | 6  | 0,000% | 0,000% | 0,144% |
| HTSR_0577 | transcription initiation factor TFB                                                                                         | 0  | 0  | 0  | 0,000% | 0,000% | 0,000% |
| HTSR_0578 | phosphopantetheine adenylyltransferase                                                                                      | 2  | 0  | 1  | 0,018% | 0,000% | 0,024% |
| HTSR_0579 | TrmB family transcriptional regulator                                                                                       | 11 | 13 | 9  | 0,100% | 0,123% | 0,215% |
| HTSR_0580 | carboxylate-amine ligase/glutamate--cysteine ligase GCS2                                                                    | 5  | 5  | 5  | 0,045% | 0,047% | 0,120% |
| HTSR_0581 | fibrillarin                                                                                                                 | 1  | 3  | 2  | 0,009% | 0,028% | 0,048% |
| HTSR_0582 | nucleolar protein-like protein                                                                                              | 12 | 13 | 15 | 0,109% | 0,123% | 0,359% |
| HTSR_0583 | Zn-ribbon RNA-binding protein                                                                                               | 0  | 3  | 3  | 0,000% | 0,028% | 0,072% |
| HTSR_0584 | elongation factor 1-beta                                                                                                    | 6  | 7  | 6  | 0,054% | 0,066% | 0,144% |
| HTSR_0585 | hypothetical protein                                                                                                        | 0  | 0  | 0  | 0,000% | 0,000% | 0,000% |
| HTSR_0586 | translation initiation factor IF-2 subunit beta                                                                             | 6  | 7  | 7  | 0,054% | 0,066% | 0,168% |
| HTSR_0587 | hypothetical protein                                                                                                        | 0  | 0  | 1  | 0,000% | 0,000% | 0,024% |
| HTSR_0588 | hypothetical protein                                                                                                        | 1  | 1  | 0  | 0,009% | 0,009% | 0,000% |
| HTSR_0589 | 8-oxoguanine DNA glycosylase                                                                                                | 1  | 1  | 17 | 0,009% | 0,009% | 0,407% |
| HTSR_0590 | yjeF family carbohydrate kinase                                                                                             | 11 | 18 | 12 | 0,100% | 0,170% | 0,287% |
| HTSR_0591 | molybdenum cofactor biosynthesis protein MoaC                                                                               | 4  | 2  | 3  | 0,036% | 0,019% | 0,072% |
| HTSR_0592 | GTP-binding protein HflX                                                                                                    | 17 | 14 | 23 | 0,154% | 0,132% | 0,551% |
| HTSR_0593 | FUN14 family protein                                                                                                        | 1  | 1  | 1  | 0,009% | 0,000% | 0,024% |
| HTSR_0594 | RNA-associated protein                                                                                                      | 20 | 14 | 6  | 0,181% | 0,132% | 0,144% |
| HTSR_0595 | proteasome subunit alpha                                                                                                    | 10 | 15 | 22 | 0,091% | 0,142% | 0,527% |
| HTSR_0596 | ribonuclease P protein subunit RPP14                                                                                        | 2  | 4  | 5  | 0,018% | 0,038% | 0,120% |
| HTSR_0597 | ribonuclease P protein subunit RPP30                                                                                        | 1  | 0  | 1  | 0,009% | 0,000% | 0,024% |
| HTSR_0598 | hypothetical protein                                                                                                        | 2  | 1  | 1  | 0,018% | 0,009% | 0,024% |
| HTSR_0599 | hypothetical protein                                                                                                        | 0  | 0  | 0  | 0,000% | 0,000% | 0,000% |
| HTSR_0600 | aspartate carbamoyltransferase regulatory subunit                                                                           | 2  | 9  | 3  | 0,018% | 0,085% | 0,072% |
| HTSR_0601 | aspartate carbamoyltransferase catalytic subunit                                                                            | 14 | 29 | 18 | 0,127% | 0,274% | 0,431% |
| HTSR_0602 | cobyrinic acid ac-diamide synthase                                                                                          | 0  | 0  | 0  | 0,000% | 0,000% | 0,000% |
| HTSR_0603 | hypothetical protein                                                                                                        | 0  | 0  | 0  | 0,000% | 0,000% | 0,000% |
| HTSR_0604 | peptidylprolyl isomerase                                                                                                    | 21 | 18 | 13 | 0,191% | 0,170% | 0,311% |
| HTSR_0605 | NRAMP family Mn <sup>2+</sup> /Fe <sup>2+</sup> transporter                                                                 | 4  | 3  | 4  | 0,036% | 0,028% | 0,096% |
| HTSR_0606 | adenylate cyclase                                                                                                           | 3  | 1  | 1  | 0,027% | 0,009% | 0,024% |
| HTSR_0607 | S-adenosylmethionine synthetase                                                                                             | 22 | 35 | 26 | 0,200% | 0,331% | 0,622% |
| HTSR_0608 | tRNA sulfurtransferase                                                                                                      | 4  | 3  | 13 | 0,036% | 0,028% | 0,311% |
| HTSR_0609 | hypothetical protein                                                                                                        | 0  | 1  | 0  | 0,000% | 0,009% | 0,000% |
| HTSR_0610 | phosphoribosylamine--glycine ligase                                                                                         | 11 | 28 | 14 | 0,100% | 0,265% | 0,335% |
| HTSR_0611 | XapX domain protein                                                                                                         | 0  | 0  | 0  | 0,000% | 0,000% | 0,000% |
| HTSR_0612 | succinate dehydrogenase subunit A                                                                                           | 17 | 26 | 14 | 0,154% | 0,246% | 0,335% |
| HTSR_0613 | succinate dehydrogenase subunit B                                                                                           | 1  | 6  | 0  | 0,009% | 0,057% | 0,000% |
| HTSR_0614 | succinate dehydrogenase subunit D                                                                                           | 0  | 0  | 0  | 0,000% | 0,000% | 0,000% |
| HTSR_0615 | succinate dehydrogenase subunit C (cytochrome b-556)                                                                        | 1  | 1  | 1  | 0,009% | 0,009% | 0,024% |
| HTSR_0616 | succinylglutamate desuccinylase/aspartoacylase                                                                              | 0  | 8  | 7  | 0,000% | 0,076% | 0,168% |
| HTSR_0617 | alpha-L-glutamate ligase, RimK family                                                                                       | 13 | 28 | 11 | 0,118% | 0,265% | 0,263% |
| HTSR_0619 | hypothetical protein                                                                                                        | 0  | 0  | 0  | 0,000% | 0,000% | 0,000% |
| HTSR_0620 | hypothetical protein                                                                                                        | 0  | 0  | 4  | 0,000% | 0,000% | 0,096% |
| HTSR_0621 | integral membrane sensor signal transduction histidine kinase                                                               | 11 | 4  | 4  | 0,100% | 0,038% | 0,096% |
| HTSR_0622 | hypothetical protein                                                                                                        | 2  | 1  | 4  | 0,018% | 0,009% | 0,096% |
| HTSR_0623 | arsenic resistance protein ArsB                                                                                             | 0  | 0  | 0  | 0,000% | 0,000% | 0,000% |
| HTSR_0624 | ArsR family transcriptional regulator                                                                                       | 0  | 0  | 0  | 0,000% | 0,000% | 0,000% |
| HTSR_0625 | transcriptional regulator                                                                                                   | 0  | 0  | 3  | 0,000% | 0,000% | 0,072% |
| HTSR_0626 | hypothetical protein                                                                                                        | 0  | 1  | 0  | 0,000% | 0,009% | 0,000% |
| HTSR_0627 | molybdopterin oxidoreductase / Formate dehydrogenase( EC:1.2.1.2 )                                                          | 38 | 82 | 17 | 0,345% | 0,775% | 0,407% |
| HTSR_0628 | 4Fe-4S ferredoxin iron-sulfur binding domain protein                                                                        | 12 | 22 | 2  | 0,109% | 0,208% | 0,048% |
| HTSR_0629 | polysulfide reductase NrfD                                                                                                  | 3  | 6  | 3  | 0,027% | 0,057% | 0,072% |
| HTSR_0630 | chaperone protein TorD                                                                                                      | 0  | 3  | 0  | 0,000% | 0,028% | 0,000% |
| HTSR_0631 | CoA-binding domain-containing protein / O-acetylhomoserine sulfhydrylase (EC 2.5.1.49) / O-succinylhomoserine sulfhydrylase | 1  | 1  | 1  | 0,009% | 0,009% | 0,024% |
| HTSR_0632 | permease                                                                                                                    | 0  | 0  | 0  | 0,000% | 0,000% | 0,000% |
| HTSR_0633 | cation diffusion facilitator family transporter                                                                             | 0  | 4  | 4  | 0,000% | 0,038% | 0,096% |
| HTSR_0634 | universal stress protein UspA                                                                                               | 3  | 7  | 2  | 0,027% | 0,066% | 0,048% |
| HTSR_0635 | hypothetical protein                                                                                                        | 2  | 1  | 0  | 0,018% | 0,009% | 0,000% |
| HTSR_0636 | formamidase                                                                                                                 | 20 | 86 | 1  | 0,181% | 0,812% | 0,024% |
| HTSR_0637 | AmiS/Urel transporter                                                                                                       | 0  | 0  | 0  | 0,000% | 0,000% | 0,000% |
| HTSR_0638 | CrcB-like protein                                                                                                           | 0  | 0  | 0  | 0,000% | 0,000% | 0,000% |
| HTSR_0639 | integral membrane protein/CrcB-like protein                                                                                 | 0  | 0  | 0  | 0,000% | 0,000% | 0,000% |
| HTSR_0640 | thermosome subunit alpha                                                                                                    | 1  | 19 | 2  | 0,009% | 0,179% | 0,048% |
| HTSR_0641 | hypothetical protein                                                                                                        | 0  | 0  | 0  | 0,000% | 0,000% | 0,000% |
| HTSR_0642 | cobalt ABC transporter ATP-binding protein                                                                                  | 9  | 0  | 0  | 0,082% | 0,000% | 0,000% |
| HTSR_0643 | cobalt ABC transporter permease                                                                                             | 3  | 0  | 0  | 0,027% | 0,000% | 0,000% |
| HTSR_0644 | hypothetical protein                                                                                                        | 4  | 0  | 1  | 0,036% | 0,000% | 0,024% |

|           |                                                         |    |    |    |        |        |        |
|-----------|---------------------------------------------------------|----|----|----|--------|--------|--------|
| HTSR_0645 | cobalt ABC transporter permease                         | 1  | 2  | 1  | 0,009% | 0,019% | 0,024% |
| HTSR_0646 | iron ABC transporter ATP-binding protein                | 0  | 0  | 0  | 0,000% | 0,000% | 0,000% |
| HTSR_0647 | iron ABC transporter permease                           | 0  | 0  | 0  | 0,000% | 0,000% | 0,000% |
| HTSR_0648 | periplasmic binding protein                             | 0  | 0  | 1  | 0,000% | 0,000% | 0,024% |
| HTSR_0649 | hydrogenase maturation protein HypF                     | 0  | 17 | 0  | 0,000% | 0,161% | 0,000% |
| HTSR_0650 | hydrogenase nickel incorporation protein HypB           | 0  | 0  | 0  | 0,000% | 0,000% | 0,000% |
| HTSR_0651 | hydrogenase nickel incorporation protein HypA           | 0  | 0  | 0  | 0,000% | 0,000% | 0,000% |
| HTSR_0652 | hydrogenase expression/formation protein HypE           | 0  | 0  | 0  | 0,000% | 0,000% | 0,000% |
| HTSR_0653 | hydrogenase expression/formation protein HypD           | 0  | 0  | 0  | 0,000% | 0,000% | 0,000% |
| HTSR_0654 | hydrogenase expression/formation protein HypC           | 0  | 0  | 0  | 0,000% | 0,000% | 0,000% |
| HTSR_0655 | hydrogenase maturation protease                         | 0  | 0  | 0  | 0,000% | 0,000% | 0,000% |
| HTSR_0656 | prokaryotic cytochrome b561                             | 0  | 7  | 0  | 0,000% | 0,066% | 0,000% |
| HTSR_0657 | Ni/Fe-hydrogenase large subunit                         | 11 | 26 | 7  | 0,100% | 0,246% | 0,168% |
| HTSR_0658 | Ni/Fe-hydrogenase small subunit                         | 1  | 5  | 2  | 0,009% | 0,047% | 0,048% |
| HTSR_0659 | hypothetical protein                                    | 1  | 1  | 3  | 0,009% | 0,009% | 0,072% |
| HTSR_0660 | GMP synthase - glutamine amidotransferase domainprotein | 0  | 4  | 2  | 0,000% | 0,038% | 0,048% |
| HTSR_0661 | hypothetical protein                                    | 0  | 0  | 1  | 0,000% | 0,000% | 0,024% |
| HTSR_0662 | succinylglutamate desuccinylase/aspartoacylase          | 0  | 1  | 0  | 0,000% | 0,009% | 0,239% |
| HTSR_0663 | hypothetical protein                                    | 0  | 0  | 0  | 0,000% | 0,000% | 0,000% |
| HTSR_0665 | N-acetyl-gamma-glutamyl-phosphate reductase             | 33 | 15 | 27 | 0,299% | 0,142% | 0,646% |
| HTSR_0666 | acetylglutamate kinase                                  | 14 | 7  | 7  | 0,127% | 0,066% | 0,168% |
| HTSR_0667 | acetylornithine aminotransferase                        | 27 | 16 | 19 | 0,245% | 0,151% | 0,455% |
| HTSR_0668 | acetylornithine deacetylase                             | 8  | 8  | 10 | 0,073% | 0,076% | 0,239% |
| HTSR_0669 | hypothetical protein                                    | 0  | 0  | 0  | 0,000% | 0,000% | 0,000% |
| HTSR_0670 | hypothetical protein                                    | 11 | 22 | 20 | 0,100% | 0,208% | 0,479% |
| HTSR_0671 | serine hydroxymethyltransferase                         | 62 | 54 | 37 | 0,563% | 0,510% | 0,886% |
| HTSR_0672 | hypothetical protein                                    | 4  | 10 | 10 | 0,036% | 0,094% | 0,239% |
| HTSR_0673 | PadR family transcriptional regulator                   | 4  | 4  | 5  | 0,036% | 0,038% | 0,120% |
| HTSR_0674 | Htr-like protein                                        | 0  | 1  | 0  | 0,000% | 0,009% | 0,000% |
| HTSR_0675 | hypothetical protein                                    | 0  | 0  | 0  | 0,000% | 0,000% | 0,000% |
| HTSR_0676 | A/G-specific adenine glycosylase                        | 0  | 1  | 0  | 0,000% | 0,009% | 0,000% |
| HTSR_0677 | NADPH-dependent FMN reductase                           | 8  | 5  | 6  | 0,073% | 0,047% | 0,144% |
| HTSR_0678 | thymidine kinase                                        | 0  | 0  | 3  | 0,000% | 0,000% | 0,072% |
| HTSR_0679 | nucleic acid binding OB-fold tRNA/helicase-type         | 28 | 29 | 27 | 0,254% | 0,274% | 0,646% |
| HTSR_0680 | histone acetyltransferase, ELP3 family protein          | 2  | 6  | 9  | 0,018% | 0,057% | 0,215% |
| HTSR_0681 | fibronectin-binding protein                             | 25 | 32 | 36 | 0,227% | 0,302% | 0,862% |
| HTSR_0682 | peptide chain release factor pelota                     | 7  | 3  | 2  | 0,064% | 0,028% | 0,048% |
| HTSR_0683 | beta-lactamase                                          | 0  | 2  | 4  | 0,000% | 0,019% | 0,096% |
| HTSR_0684 | ATP-dependent helicase                                  | 2  | 5  | 10 | 0,018% | 0,047% | 0,239% |
| HTSR_0685 | hypothetical protein                                    | 0  | 3  | 3  | 0,000% | 0,028% | 0,072% |
| HTSR_0686 | hypothetical protein                                    | 0  | 0  | 0  | 0,000% | 0,000% | 0,000% |
| HTSR_0687 | integral membrane protein                               | 1  | 1  | 0  | 0,009% | 0,009% | 0,000% |
| HTSR_0688 | signal-transducing histidine kinase                     | 11 | 15 | 13 | 0,100% | 0,142% | 0,311% |
| HTSR_0689 | DNA helicase                                            | 3  | 19 | 16 | 0,027% | 0,179% | 0,383% |
| HTSR_0690 | hypothetical protein                                    | 12 | 7  | 17 | 0,109% | 0,066% | 0,407% |
| HTSR_0691 | TetR family transcriptional regulator                   | 4  | 3  | 3  | 0,036% | 0,028% | 0,072% |
| HTSR_0692 | hypothetical protein                                    | 1  | 1  | 3  | 0,009% | 0,009% | 0,072% |
| HTSR_0693 | ABC transporter ATP-binding protein                     | 0  | 0  | 0  | 0,000% | 0,000% | 0,000% |
| HTSR_0694 | ABC transporter permease                                | 0  | 0  | 0  | 0,000% | 0,000% | 0,000% |
| HTSR_0695 | hypothetical protein                                    | 3  | 2  | 2  | 0,027% | 0,019% | 0,048% |
| HTSR_0696 | endoglucanase                                           | 7  | 0  | 16 | 0,064% | 0,000% | 0,383% |
| HTSR_0697 | small nuclear ribonucleoprotein                         | 0  | 0  | 0  | 0,000% | 0,000% | 0,000% |
| HTSR_0698 | 50S ribosomal protein L37e                              | 0  | 1  | 2  | 0,000% | 0,009% | 0,048% |
| HTSR_0699 | amidophosphoribosyltransferase                          | 8  | 17 | 7  | 0,073% | 0,161% | 0,168% |
| HTSR_0701 | acylphosphatase                                         | 1  | 3  | 1  | 0,009% | 0,028% | 0,024% |
| HTSR_0702 | IS1341-type transposase                                 | 0  | 0  | 2  | 0,000% | 0,000% | 0,048% |
| HTSR_0703 | hypothetical protein                                    | 0  | 0  | 0  | 0,000% | 0,000% | 0,000% |
| HTSR_0704 | thioredoxin reductase                                   | 5  | 8  | 8  | 0,045% | 0,076% | 0,191% |
| HTSR_0705 | cyclase family protein                                  | 1  | 0  | 0  | 0,009% | 0,000% | 0,000% |
| HTSR_0706 | hypothetical protein                                    | 1  | 1  | 1  | 0,009% | 0,009% | 0,024% |
| HTSR_0707 | universal stress protein UspA                           | 6  | 19 | 1  | 0,054% | 0,179% | 0,024% |
| HTSR_0708 | 5'-nucleotidase                                         | 0  | 1  | 1  | 0,000% | 0,009% | 0,024% |
| HTSR_0709 | hypothetical protein                                    | 5  | 13 | 6  | 0,045% | 0,123% | 0,144% |
| HTSR_0710 | MscS mechanosensitive ion channel                       | 4  | 4  | 2  | 0,036% | 0,038% | 0,048% |
| HTSR_0711 | galactoside O-acetyltransferase 3                       | 0  | 1  | 1  | 0,000% | 0,009% | 0,024% |
| HTSR_0712 | hypothetical protein                                    | 0  | 0  | 0  | 0,000% | 0,000% | 0,000% |
| HTSR_0713 | hypothetical protein                                    | 0  | 0  | 4  | 0,000% | 0,000% | 0,096% |
| HTSR_0714 | sporulation regulator-like protein                      | 0  | 0  | 1  | 0,000% | 0,000% | 0,024% |
| HTSR_0715 | phosphoglycerate kinase                                 | 18 | 21 | 15 | 0,163% | 0,198% | 0,359% |
| HTSR_0716 | signal transduction protein with CBS domains            | 5  | 6  | 3  | 0,045% | 0,057% | 0,072% |
| HTSR_0717 | uridine kinase                                          | 2  | 2  | 3  | 0,018% | 0,019% | 0,072% |
| HTSR_0718 | hypothetical protein                                    | 0  | 2  | 2  | 0,000% | 0,019% | 0,048% |
| HTSR_0719 | DoxX family protein                                     | 0  | 0  | 0  | 0,000% | 0,000% | 0,000% |
| HTSR_0720 | hypothetical protein                                    | 0  | 0  | 0  | 0,000% | 0,000% | 0,000% |
| HTSR_0722 | hypothetical protein                                    | 0  | 0  | 0  | 0,000% | 0,000% | 0,000% |
| HTSR_0723 | hypothetical protein                                    | 18 | 17 | 20 | 0,163% | 0,161% | 0,479% |
| HTSR_0724 | chorismate synthase                                     | 19 | 11 | 14 | 0,172% | 0,104% | 0,335% |
| HTSR_0725 | 3-phosphoshikimate 1-carboxyvinyltransferase            | 5  | 18 | 7  | 0,045% | 0,170% | 0,168% |
| HTSR_0726 | Xaa-Pro aminopeptidase                                  | 8  | 14 | 9  | 0,073% | 0,132% | 0,215% |
| HTSR_0727 | prephenate dehydrogenase                                | 11 | 10 | 4  | 0,100% | 0,094% | 0,096% |
| HTSR_0728 | methyltransferase family protein                        | 4  | 9  | 14 | 0,036% | 0,085% | 0,335% |
| HTSR_0729 | 5-nucleotidase                                          | 1  | 5  | 2  | 0,009% | 0,047% | 0,048% |
| HTSR_0730 | hypothetical protein                                    | 0  | 0  | 0  | 0,000% | 0,000% | 0,000% |
| HTSR_0731 | MazF family transcriptional regulator                   | 3  | 2  | 1  | 0,027% | 0,019% | 0,024% |
| HTSR_0732 | chorismate mutase                                       | 0  | 1  | 3  | 0,000% | 0,009% | 0,072% |
| HTSR_0733 | shikimate kinase                                        | 4  | 4  | 3  | 0,036% | 0,038% | 0,072% |
| HTSR_0734 | hypothetical protein                                    | 3  | 2  | 2  | 0,027% | 0,019% | 0,048% |
| HTSR_0735 | small CPxCG-related zinc finger protein                 | 0  | 0  | 0  | 0,000% | 0,000% | 0,000% |
| HTSR_0736 | cell division control protein 48                        | 25 | 27 | 30 | 0,227% | 0,255% | 0,718% |
| HTSR_0737 | HAD-superfamily hydrolase                               | 4  | 2  | 2  | 0,036% | 0,019% | 0,048% |
| HTSR_0738 | ATP-dependent DNA helicase                              | 2  | 10 | 23 | 0,018% | 0,094% | 0,551% |
| HTSR_0739 | metallophosphoesterase                                  | 0  | 0  | 0  | 0,000% | 0,000% | 0,000% |
| HTSR_0740 | glycerol dehydrogenase                                  | 21 | 21 | 17 | 0,191% | 0,198% | 0,407% |
| HTSR_0741 | 5-amino-6-(5-phosphoribosylamino)uracil reductase       | 1  | 2  | 1  | 0,009% | 0,019% | 0,024% |
| HTSR_0742 | hypothetical protein                                    | 4  | 3  | 2  | 0,036% | 0,028% | 0,048% |
| HTSR_0743 | thioredoxin-disulfide reductase                         | 11 | 4  | 2  | 0,100% | 0,038% | 0,048% |
| HTSR_0744 | hypothetical protein                                    | 1  | 2  | 2  | 0,009% | 0,019% | 0,048% |
| HTSR_0745 | 50S ribosomal protein L21e                              | 3  | 4  | 4  | 0,027% | 0,038% | 0,096% |
| HTSR_0746 | DNA-directed RNA polymerase subunit F                   | 6  | 6  | 4  | 0,054% | 0,057% | 0,096% |
| HTSR_0747 | adenosine deaminase                                     | 16 | 22 | 10 | 0,145% | 0,208% | 0,239% |
| HTSR_0748 | dimethyladenosine transferase                           | 0  | 8  | 11 | 0,000% | 0,076% | 0,263% |
| HTSR_0749 | methyltransferase                                       | 0  | 1  | 1  | 0,000% | 0,009% | 0,024% |
| HTSR_0750 | radical SAM protein                                     | 0  | 0  | 0  | 0,000% | 0,000% | 0,000% |
| HTSR_0751 | formate dehydrogenase, gamma subunit                    | 0  | 2  | 0  | 0,000% | 0,019% | 0,000% |
| HTSR_0752 | hypothetical protein                                    | 0  | 0  | 0  | 0,000% | 0,000% | 0,000% |

|           |                                                             |    |    |    |        |        |        |
|-----------|-------------------------------------------------------------|----|----|----|--------|--------|--------|
| HTSR_0753 | aldehyde ferredoxin oxidoreductase                          | 0  | 15 | 0  | 0,000% | 0,142% | 0,000% |
| HTSR_0754 | 4Fe-4S ferredoxin iron-sulfur binding domain protein        | 0  | 0  | 0  | 0,000% | 0,000% | 0,000% |
| HTSR_0755 | bacterio-opsin activator HTH domain-containing protein      | 0  | 0  | 1  | 0,000% | 0,000% | 0,024% |
| HTSR_0756 | nucleoside diphosphate kinase                               | 12 | 7  | 5  | 0,109% | 0,066% | 0,120% |
| HTSR_0757 | 50S ribosomal protein L24e                                  | 1  | 1  | 1  | 0,009% | 0,009% | 0,024% |
| HTSR_0758 | 30S ribosomal protein S28e                                  | 2  | 1  | 2  | 0,018% | 0,009% | 0,048% |
| HTSR_0759 | 50S ribosomal protein L7Ae                                  | 4  | 5  | 3  | 0,036% | 0,047% | 0,072% |
| HTSR_0760 | bifunctional p-loop ATPase/acetyltransferase                | 0  | 13 | 14 | 0,000% | 0,123% | 0,335% |
| HTSR_0761 | glutamyl-tRNA synthetase                                    | 16 | 20 | 14 | 0,145% | 0,189% | 0,335% |
| HTSR_0762 | geranylgeranyl diphosphate synthase                         | 5  | 9  | 5  | 0,045% | 0,085% | 0,120% |
| HTSR_0763 | ribonuclease J                                              | 33 | 58 | 52 | 0,299% | 0,548% | 1,245% |
| HTSR_0764 | isopentenyl phosphate kinase                                | 0  | 5  | 1  | 0,000% | 0,047% | 0,024% |
| HTSR_0765 | mevalonate kinase                                           | 8  | 16 | 4  | 0,073% | 0,151% | 0,096% |
| HTSR_0766 | 30S ribosomal protein S2                                    | 13 | 13 | 14 | 0,118% | 0,123% | 0,335% |
| HTSR_0767 | enolase                                                     | 20 | 19 | 15 | 0,181% | 0,179% | 0,359% |
| HTSR_0768 | DNA-directed RNA polymerase subunit K                       | 0  | 0  | 0  | 0,000% | 0,000% | 0,000% |
| HTSR_0769 | DNA-directed RNA polymerase subunit N                       | 2  | 4  | 2  | 0,018% | 0,038% | 0,048% |
| HTSR_0770 | 30S ribosomal protein S9                                    | 4  | 7  | 14 | 0,036% | 0,066% | 0,335% |
| HTSR_0771 | 50S ribosomal protein L13                                   | 7  | 7  | 12 | 0,064% | 0,066% | 0,287% |
| HTSR_0772 | 50S ribosomal protein L18e                                  | 12 | 8  | 9  | 0,109% | 0,076% | 0,215% |
| HTSR_0774 | DNA-directed RNA polymerase subunit D                       | 16 | 16 | 11 | 0,145% | 0,151% | 0,263% |
| HTSR_0775 | 30S ribosomal protein S11                                   | 9  | 8  | 9  | 0,082% | 0,076% | 0,215% |
| HTSR_0776 | 30S ribosomal protein S4                                    | 11 | 9  | 11 | 0,100% | 0,085% | 0,263% |
| HTSR_0777 | 30S ribosomal protein S13                                   | 16 | 8  | 17 | 0,145% | 0,076% | 0,407% |
| HTSR_0779 | molybdenum cofactor biosynthesis protein A                  | 6  | 0  | 2  | 0,054% | 0,000% | 0,048% |
| HTSR_0780 | ATP-binding protein Mrp                                     | 15 | 16 | 8  | 0,136% | 0,151% | 0,191% |
| HTSR_0781 | 2-ketoglutarate ferredoxin oxidoreductase subunit alpha     | 35 | 59 | 43 | 0,318% | 0,557% | 1,029% |
| HTSR_0782 | 2-ketoglutarate ferredoxin oxidoreductase subunit beta      | 15 | 31 | 25 | 0,136% | 0,293% | 0,598% |
| HTSR_0783 | AsnC family transcriptional regulator                       | 4  | 3  | 1  | 0,036% | 0,028% | 0,024% |
| HTSR_0784 | aspartate aminotransferase                                  | 13 | 14 | 9  | 0,118% | 0,132% | 0,215% |
| HTSR_0785 | uridine phosphorylase                                       | 16 | 12 | 11 | 0,145% | 0,113% | 0,263% |
| HTSR_0786 | cytidine deaminase                                          | 1  | 0  | 0  | 0,009% | 0,000% | 0,000% |
| HTSR_0787 | hypothetical protein                                        | 0  | 0  | 0  | 0,000% | 0,000% | 0,000% |
| HTSR_0788 | hypothetical protein                                        | 0  | 0  | 0  | 0,000% | 0,000% | 0,000% |
| HTSR_0789 | bacterio-opsin activator HTH domain-containing protein      | 0  | 8  | 4  | 0,000% | 0,076% | 0,096% |
| HTSR_0790 | bacterio-opsin activator HTH domain-containing protein      | 1  | 4  | 0  | 0,009% | 0,038% | 0,000% |
| HTSR_0791 | hypothetical protein                                        | 0  | 0  | 0  | 0,000% | 0,000% | 0,000% |
| HTSR_0792 | hypothetical protein                                        | 0  | 0  | 0  | 0,000% | 0,000% | 0,000% |
| HTSR_0793 | ribose ABC transporter permease                             | 1  | 1  | 0  | 0,009% | 0,009% | 0,000% |
| HTSR_0794 | ribose ABC transporter permease                             | 0  | 1  | 0  | 0,000% | 0,009% | 0,000% |
| HTSR_0795 | ribose ABC transporter ATP-binding protein                  | 1  | 2  | 1  | 0,009% | 0,019% | 0,024% |
| HTSR_0796 | ABC transporter substrate-binding protein                   | 16 | 13 | 15 | 0,145% | 0,123% | 0,359% |
| HTSR_0797 | phosphomannomutase                                          | 12 | 21 | 12 | 0,109% | 0,198% | 0,287% |
| HTSR_0798 | hypothetical protein                                        | 1  | 0  | 1  | 0,009% | 0,000% | 0,024% |
| HTSR_0799 | type II secretion system protein E                          | 2  | 11 | 23 | 0,018% | 0,104% | 0,551% |
| HTSR_0800 | type II secretion system protein F                          | 3  | 7  | 1  | 0,027% | 0,066% | 0,024% |
| HTSR_0801 | type 11 methyltransferase                                   | 1  | 1  | 1  | 0,009% | 0,009% | 0,024% |
| HTSR_0803 | hypothetical protein                                        | 6  | 8  | 9  | 0,054% | 0,076% | 0,215% |
| HTSR_0804 | phosphohydrolase                                            | 3  | 8  | 4  | 0,027% | 0,076% | 0,096% |
| HTSR_0805 | twin-arginine translocation protein, Tat/A/E family subunit | 7  | 10 | 7  | 0,064% | 0,094% | 0,168% |
| HTSR_0807 | cytochrome bd quinol oxidase subunit 1                      | 6  | 8  | 4  | 0,054% | 0,076% | 0,096% |
| HTSR_0808 | cytochrome bd quinol oxidase subunit 2                      | 2  | 2  | 2  | 0,018% | 0,019% | 0,048% |
| HTSR_0809 | HAD-superfamily hydrolase                                   | 2  | 0  | 7  | 0,018% | 0,000% | 0,168% |
| HTSR_0810 | CBS domain-containing protein                               | 9  | 5  | 4  | 0,082% | 0,047% | 0,096% |
| HTSR_0811 | thioredoxin reductase                                       | 12 | 10 | 4  | 0,109% | 0,094% | 0,096% |
| HTSR_0812 | cyclase/dehydrase                                           | 4  | 4  | 4  | 0,036% | 0,038% | 0,096% |
| HTSR_0813 | TrmB family transcriptional regulator                       | 15 | 17 | 8  | 0,136% | 0,161% | 0,191% |
| HTSR_0814 | UDP-glucose 4-epimerase                                     | 2  | 7  | 2  | 0,018% | 0,066% | 0,048% |
| HTSR_0815 | arsenic ABC transporter ATPase                              | 11 | 23 | 16 | 0,100% | 0,217% | 0,383% |
| HTSR_0816 | DNA gyrase subunit A                                        | 29 | 36 | 34 | 0,263% | 0,340% | 0,814% |
| HTSR_0817 | DNA gyrase subunit B                                        | 11 | 20 | 48 | 0,100% | 0,189% | 1,149% |
| HTSR_0818 | DNA topoisomerase VI subunit B                              | 18 | 28 | 34 | 0,163% | 0,265% | 0,814% |
| HTSR_0819 | DNA topoisomerase VI subunit A                              | 1  | 2  | 9  | 0,009% | 0,019% | 0,215% |
| HTSR_0820 | hypothetical protein                                        | 1  | 8  | 6  | 0,009% | 0,076% | 0,144% |
| HTSR_0821 | proteasome subunit beta                                     | 6  | 17 | 19 | 0,054% | 0,161% | 0,455% |
| HTSR_0822 | signal-transducing histidine kinase/response regulator      | 10 | 18 | 6  | 0,091% | 0,170% | 0,144% |
| HTSR_0823 | glyoxalase/bleomycin resistance protein/dioxygenase         | 2  | 3  | 2  | 0,018% | 0,028% | 0,048% |
| HTSR_0824 | hypothetical protein                                        | 0  | 0  | 0  | 0,000% | 0,000% | 0,000% |
| HTSR_0825 | hypothetical protein                                        | 0  | 0  | 0  | 0,000% | 0,000% | 0,000% |
| HTSR_0826 | XRE family transcriptional regulator                        | 6  | 3  | 1  | 0,054% | 0,028% | 0,024% |
| HTSR_0827 | phosphoribosylaminoimidazole synthetase                     | 5  | 9  | 8  | 0,045% | 0,085% | 0,191% |
| HTSR_0828 | hypothetical protein                                        | 0  | 0  | 0  | 0,000% | 0,000% | 0,000% |
| HTSR_0829 | methyltransferase type 11                                   | 1  | 0  | 0  | 0,009% | 0,000% | 0,000% |
| HTSR_0830 | 6-pyruvoyltetrahydropterin synthase                         | 0  | 0  | 0  | 0,000% | 0,000% | 0,000% |
| HTSR_0831 | alcohol dehydrogenase zinc-binding domain protein           | 0  | 2  | 0  | 0,000% | 0,019% | 0,000% |
| HTSR_0832 | glucose-6-phosphatase                                       | 0  | 0  | 0  | 0,000% | 0,000% | 0,000% |
| HTSR_0833 | CDP-alcohol phosphatidyltransferase                         | 0  | 0  | 0  | 0,000% | 0,000% | 0,000% |
| HTSR_0834 | hypothetical protein                                        | 0  | 1  | 0  | 0,000% | 0,009% | 0,000% |
| HTSR_0835 | glycosyl transferase group 1                                | 0  | 2  | 6  | 0,000% | 0,019% | 0,144% |
| HTSR_0836 | metallopeptidase                                            | 0  | 0  | 0  | 0,000% | 0,000% | 0,000% |
| HTSR_0837 | TraB family protein                                         | 1  | 0  | 3  | 0,009% | 0,000% | 0,072% |
| HTSR_0838 | hypothetical protein                                        | 0  | 0  | 0  | 0,000% | 0,000% | 0,000% |
| HTSR_0839 | thioesterase superfamily protein                            | 1  | 1  | 2  | 0,009% | 0,009% | 0,048% |
| HTSR_0840 | hypothetical protein                                        | 1  | 1  | 0  | 0,009% | 0,009% | 0,000% |
| HTSR_0841 | anaerobic glycerol-3-phosphate dehydrogenase subunit A      | 0  | 14 | 7  | 0,000% | 0,132% | 0,168% |
| HTSR_0842 | anaerobic glycerol-3-phosphate dehydrogenase subunit C      | 0  | 2  | 1  | 0,000% | 0,019% | 0,024% |
| HTSR_0843 | putative ATPase (AAA+ superfamily)                          | 2  | 12 | 21 | 0,018% | 0,113% | 0,503% |
| HTSR_0844 | hypothetical protein                                        | 0  | 0  | 0  | 0,000% | 0,000% | 0,000% |
| HTSR_0845 | oligosaccharyltransferase AgIB                              | 11 | 9  | 4  | 0,100% | 0,085% | 0,096% |
| HTSR_0846 | glycosyl transferase family 2                               | 4  | 8  | 7  | 0,036% | 0,076% | 0,168% |
| HTSR_0847 | GDP-mannose mannosyl hydrolase                              | 0  | 0  | 4  | 0,000% | 0,000% | 0,096% |
| HTSR_0848 | UDP-glucose 4-epimerase                                     | 13 | 16 | 25 | 0,118% | 0,151% | 0,598% |
| HTSR_0849 | dTDP-glucose 4,6-dehydratase                                | 18 | 7  | 29 | 0,163% | 0,066% | 0,694% |
| HTSR_0850 | NAD-dependent dehydratase                                   | 0  | 0  | 0  | 0,000% | 0,000% | 0,000% |
| HTSR_0851 | capsular polysaccharide biosynthesis protein                | 0  | 1  | 3  | 0,000% | 0,009% | 0,072% |
| HTSR_0852 | group 1 glycosyl transferase                                | 2  | 17 | 17 | 0,018% | 0,161% | 0,407% |
| HTSR_0853 | N-acetylgalactosamine 6-sulfatase                           | 5  | 17 | 27 | 0,045% | 0,161% | 0,646% |
| HTSR_0854 | glucose-1-phosphate thymidyltransferase                     | 2  | 4  | 4  | 0,018% | 0,038% | 0,096% |
| HTSR_0855 | hypothetical protein                                        | 2  | 4  | 7  | 0,018% | 0,038% | 0,168% |
| HTSR_0856 | hypothetical protein / Tetratricopeptide TPR_2              | 1  | 1  | 5  | 0,009% | 0,009% | 0,120% |
| HTSR_0857 | dTDP-glucose 4,6-dehydratase                                | 11 | 18 | 22 | 0,100% | 0,170% | 0,527% |
| HTSR_0858 | 3-deoxy-manno-oculosonate cytidyltransferase                | 7  | 0  | 4  | 0,064% | 0,000% | 0,096% |
| HTSR_0859 | 2-dehydro-3-deoxyphosphooctonate aldolase                   | 6  | 2  | 15 | 0,054% | 0,019% | 0,359% |
| HTSR_0860 | arabinose-5-phosphate isomerase                             | 4  | 3  | 4  | 0,036% | 0,028% | 0,096% |
| HTSR_0863 | CopG family transcriptional regulator                       | 0  | 0  | 2  | 0,000% | 0,000% | 0,048% |



|           |                                                                    |    |    |    |        |        |        |
|-----------|--------------------------------------------------------------------|----|----|----|--------|--------|--------|
| HTSR_0864 | capsule polysaccharide biosynthesis protein                        | 4  | 21 | 16 | 0,036% | 0,198% | 0,383% |
| HTSR_0865 | glycosyl transferase group 1                                       | 0  | 0  | 0  | 0,000% | 0,000% | 0,000% |
| HTSR_0866 | glucose-1-phosphate thymidyltransferase                            | 5  | 4  | 5  | 0,045% | 0,038% | 0,120% |
| HTSR_0867 | hypothetical protein                                               | 0  | 3  | 1  | 0,000% | 0,028% | 0,024% |
| HTSR_0868 | hypothetical protein                                               | 0  | 0  | 0  | 0,000% | 0,000% | 0,000% |
| HTSR_0869 | hypothetical protein                                               | 0  | 0  | 0  | 0,000% | 0,000% | 0,000% |
| HTSR_0870 | glucose-1-phosphate thymidyltransferase                            | 0  | 0  | 0  | 0,000% | 0,000% | 0,000% |
| HTSR_0871 | twitching motility protein PiIT                                    | 1  | 3  | 5  | 0,009% | 0,028% | 0,120% |
| HTSR_0872 | hypothetical protein                                               | 0  | 0  | 0  | 0,000% | 0,000% | 0,000% |
| HTSR_0873 | hypothetical protein                                               | 0  | 0  | 0  | 0,000% | 0,000% | 0,000% |
| HTSR_0874 | hypothetical protein                                               | 0  | 0  | 0  | 0,000% | 0,000% | 0,000% |
| HTSR_0875 | hypothetical protein                                               | 3  | 0  | 0  | 0,027% | 0,000% | 0,000% |
| HTSR_0876 | hypothetical protein                                               | 1  | 1  | 1  | 0,009% | 0,009% | 0,024% |
| HTSR_0877 | hypothetical protein                                               | 1  | 1  | 0  | 0,009% | 0,009% | 0,000% |
| HTSR_0878 | UDP-glucose 6-dehydrogenase                                        | 13 | 14 | 9  | 0,118% | 0,132% | 0,215% |
| HTSR_0879 | ABC-type multidrug transport system, ATPase and permease component | 10 | 13 | 7  | 0,091% | 0,123% | 0,168% |
| HTSR_0880 | hypothetical protein                                               | 0  | 1  | 1  | 0,000% | 0,009% | 0,024% |
| HTSR_0881 | hypothetical protein                                               | 0  | 0  | 0  | 0,000% | 0,000% | 0,000% |
| HTSR_0882 | glucosamine--fructose-6-phosphate aminotransferase                 | 9  | 21 | 11 | 0,082% | 0,198% | 0,263% |
| HTSR_0883 | glucose-1-phosphate thymidyltransferase                            | 6  | 17 | 5  | 0,054% | 0,161% | 0,120% |
| HTSR_0884 | hypothetical protein                                               | 0  | 0  | 0  | 0,000% | 0,000% | 0,000% |
| HTSR_0885 | sugar-specific transcriptional regulator                           | 3  | 10 | 10 | 0,027% | 0,094% | 0,239% |
| HTSR_0886 | UDP-glucose 4-epimerase                                            | 1  | 2  | 0  | 0,009% | 0,019% | 0,000% |
| HTSR_0887 | UDP-glucose 4-epimerase                                            | 4  | 18 | 5  | 0,036% | 0,170% | 0,120% |
| HTSR_0888 | UDP-sulfoquinovose synthase                                        | 19 | 34 | 12 | 0,172% | 0,321% | 0,287% |
| HTSR_0889 | hypothetical protein                                               | 0  | 0  | 0  | 0,000% | 0,000% | 0,000% |
| HTSR_0890 | UDP-N-acetylglucosamine diphosphorylase                            | 7  | 9  | 8  | 0,064% | 0,085% | 0,191% |
| HTSR_0891 | glycosyl transferase family 2                                      | 2  | 6  | 8  | 0,018% | 0,057% | 0,191% |
| HTSR_0892 | hypothetical protein                                               | 5  | 10 | 7  | 0,045% | 0,094% | 0,168% |
| HTSR_0893 | hypothetical protein                                               | 1  | 1  | 2  | 0,009% | 0,009% | 0,048% |
| HTSR_0894 | metallo-beta-lactamase family protein                              | 1  | 5  | 0  | 0,009% | 0,047% | 0,000% |
| HTSR_0895 | 2-hydroxyhepta-2,4-diene-1,7-dioate isomerase                      | 12 | 5  | 12 | 0,109% | 0,047% | 0,287% |
| HTSR_0896 | hypothetical protein                                               | 0  | 1  | 0  | 0,000% | 0,009% | 0,000% |
| HTSR_0897 | signal peptidase I                                                 | 0  | 0  | 0  | 0,000% | 0,000% | 0,000% |
| HTSR_0898 | phage protein                                                      | 0  | 0  | 0  | 0,000% | 0,000% | 0,000% |
| HTSR_0899 | hypothetical protein                                               | 0  | 7  | 0  | 0,000% | 0,066% | 0,000% |
| HTSR_0900 | hypothetical protein                                               | 0  | 0  | 0  | 0,000% | 0,000% | 0,000% |
| HTSR_0901 | hypothetical protein                                               | 0  | 10 | 0  | 0,000% | 0,094% | 0,000% |
| HTSR_0902 | hypothetical protein                                               | 0  | 4  | 0  | 0,000% | 0,038% | 0,000% |
| HTSR_0903 | von Willebrand factor type A                                       | 0  | 0  | 0  | 0,000% | 0,000% | 0,000% |
| HTSR_0904 | hypothetical protein / Chitinase (EC 3.2.1.14)                     | 0  | 1  | 0  | 0,000% | 0,009% | 0,000% |
| HTSR_0905 | von Willebrand factor type A                                       | 1  | 3  | 0  | 0,009% | 0,028% | 0,000% |
| HTSR_0906 | hypothetical protein                                               | 0  | 1  | 0  | 0,000% | 0,009% | 0,000% |
| HTSR_0907 | hypothetical protein                                               | 0  | 3  | 0  | 0,000% | 0,028% | 0,000% |
| HTSR_0908 | von Willebrand factor type A                                       | 0  | 2  | 0  | 0,000% | 0,019% | 0,000% |
| HTSR_0909 | hypothetical protein                                               | 0  | 0  | 0  | 0,000% | 0,000% | 0,000% |
| HTSR_0910 | hypothetical protein                                               | 3  | 7  | 0  | 0,027% | 0,066% | 0,000% |
| HTSR_0911 | histidinol-phosphate aminotransferase                              | 7  | 17 | 14 | 0,064% | 0,161% | 0,335% |
| HTSR_0912 | adenylate kinase                                                   | 2  | 0  | 2  | 0,018% | 0,000% | 0,048% |
| HTSR_0913 | CDP-diacylglycerol--glycerol-3-phosphate 3-phosphatidyltransferase | 1  | 1  | 2  | 0,009% | 0,009% | 0,048% |
| HTSR_0914 | XRE family transcriptional regulator                               | 3  | 2  | 4  | 0,027% | 0,019% | 0,096% |
| HTSR_0915 | triosephosphate isomerase                                          | 6  | 7  | 6  | 0,054% | 0,066% | 0,144% |
| HTSR_0916 | DNA polymerase IV                                                  | 0  | 0  | 1  | 0,000% | 0,000% | 0,024% |
| HTSR_0917 | GTP cyclohydrolase IIa                                             | 10 | 13 | 9  | 0,091% | 0,123% | 0,215% |
| HTSR_0918 | sulfonate ABC transporter periplasmic substrate-binding protein    | 12 | 2  | 15 | 0,109% | 0,019% | 0,359% |
| HTSR_0919 | hypothetical protein                                               | 1  | 0  | 0  | 0,009% | 0,000% | 0,000% |
| HTSR_0920 | sulfonate ABC transporter permease                                 | 0  | 0  | 0  | 0,000% | 0,000% | 0,000% |
| HTSR_0921 | sulfonate ABC transporter ATP-binding protein                      | 0  | 0  | 0  | 0,000% | 0,000% | 0,000% |
| HTSR_0922 | hypothetical protein                                               | 12 | 5  | 4  | 0,109% | 0,047% | 0,096% |
| HTSR_0923 | molybdenum cofactor biosynthesis protein MoeA                      | 18 | 16 | 11 | 0,163% | 0,151% | 0,263% |
| HTSR_0924 | molybdenum cofactor biosynthesis protein MoeA                      | 20 | 31 | 21 | 0,181% | 0,293% | 0,503% |
| HTSR_0925 | Trk system potassium uptake protein TrkA                           | 10 | 5  | 3  | 0,091% | 0,047% | 0,072% |
| HTSR_0926 | hypothetical protein                                               | 5  | 4  | 5  | 0,045% | 0,038% | 0,120% |
| HTSR_0927 | hypothetical protein                                               | 5  | 9  | 17 | 0,045% | 0,085% | 0,407% |
| HTSR_0928 | cold-shock protein                                                 | 0  | 0  | 0  | 0,000% | 0,000% | 0,000% |
| HTSR_0929 | hypothetical protein                                               | 1  | 0  | 1  | 0,009% | 0,000% | 0,024% |
| HTSR_0930 | phage integrase/site-specific recombinase                          | 0  | 0  | 3  | 0,000% | 0,000% | 0,072% |
| HTSR_0931 | hypothetical protein                                               | 3  | 0  | 1  | 0,027% | 0,000% | 0,024% |
| HTSR_0932 | hypothetical protein                                               | 0  | 0  | 0  | 0,000% | 0,000% | 0,000% |
| HTSR_0933 | site-specific recombinase, DNA invertase Pin                       | 0  | 0  | 0  | 0,000% | 0,000% | 0,000% |
| HTSR_0934 | type II restriction enzyme, methylase subunits                     | 7  | 23 | 22 | 0,064% | 0,217% | 0,527% |
| HTSR_0935 | hypothetical protein                                               | 0  | 0  | 0  | 0,000% | 0,000% | 0,000% |
| HTSR_0936 | hypothetical protein                                               | 2  | 0  | 1  | 0,018% | 0,000% | 0,024% |
| HTSR_0937 | hypothetical protein                                               | 0  | 0  | 0  | 0,000% | 0,000% | 0,000% |
| HTSR_0938 | hypothetical protein                                               | 0  | 0  | 0  | 0,000% | 0,000% | 0,000% |
| HTSR_0939 | hypothetical protein                                               | 0  | 0  | 0  | 0,000% | 0,000% | 0,000% |
| HTSR_0940 | hypothetical protein                                               | 0  | 0  | 0  | 0,000% | 0,000% | 0,000% |
| HTSR_0941 | hypothetical protein                                               | 0  | 0  | 0  | 0,000% | 0,000% | 0,000% |
| HTSR_0942 | hypothetical protein                                               | 0  | 0  | 0  | 0,000% | 0,000% | 0,000% |
| HTSR_0943 | hypothetical protein                                               | 0  | 0  | 0  | 0,000% | 0,000% | 0,000% |
| HTSR_0944 | hypothetical protein                                               | 0  | 0  | 2  | 0,000% | 0,000% | 0,048% |
| HTSR_0945 | IMP dehydrogenase                                                  | 46 | 44 | 29 | 0,417% | 0,416% | 0,694% |
| HTSR_0946 | hypothetical protein                                               | 0  | 0  | 0  | 0,000% | 0,000% | 0,000% |
| HTSR_0947 | hypothetical protein                                               | 0  | 0  | 0  | 0,000% | 0,000% | 0,000% |
| HTSR_0948 | hypothetical protein                                               | 0  | 0  | 0  | 0,000% | 0,000% | 0,000% |
| HTSR_0949 | zinc/iron permease                                                 | 0  | 0  | 0  | 0,000% | 0,000% | 0,000% |
| HTSR_0950 | circadian clock protein, KaiC                                      | 10 | 2  | 17 | 0,091% | 0,019% | 0,407% |
| HTSR_0951 | PAS domain s-box                                                   | 8  | 27 | 12 | 0,073% | 0,255% | 0,287% |
| HTSR_0953 | DHH family phosphoesterase                                         | 9  | 13 | 9  | 0,082% | 0,123% | 0,215% |
| HTSR_0954 | photosystem reaction center subunit H                              | 4  | 6  | 4  | 0,036% | 0,057% | 0,096% |
| HTSR_0955 | DRTGG domain protein                                               | 16 | 30 | 16 | 0,145% | 0,283% | 0,383% |
| HTSR_0956 | acetyl-CoA synthetase                                              | 26 | 39 | 19 | 0,236% | 0,368% | 0,455% |
| HTSR_0957 | citrate transporter                                                | 0  | 6  | 1  | 0,000% | 0,057% | 0,024% |
| HTSR_0958 | hypothetical protein                                               | 0  | 0  | 0  | 0,000% | 0,000% | 0,000% |
| HTSR_0959 | SSSF family transport protein                                      | 1  | 3  | 2  | 0,009% | 0,028% | 0,048% |
| HTSR_0960 | hypothetical protein                                               | 0  | 0  | 0  | 0,000% | 0,000% | 0,000% |
| HTSR_0961 | integrase family protein                                           | 0  | 0  | 7  | 0,000% | 0,000% | 0,168% |
| HTSR_0962 | hypothetical protein                                               | 0  | 0  | 1  | 0,000% | 0,000% | 0,024% |
| HTSR_0963 | histidine kinase                                                   | 0  | 0  | 6  | 0,000% | 0,000% | 0,144% |
| HTSR_0964 | phosphoadenosine phosphosulfate reductase                          | 20 | 21 | 20 | 0,181% | 0,198% | 0,479% |
| HTSR_0965 | oxidoreductase (aldo-keto reductase family protein)                | 19 | 22 | 14 | 0,172% | 0,208% | 0,335% |
| HTSR_0966 | electron transfer flavoprotein                                     | 15 | 22 | 22 | 0,136% | 0,208% | 0,527% |
| HTSR_0967 | N-acetyltransferase GCN5                                           | 0  | 4  | 1  | 0,000% | 0,038% | 0,024% |
| HTSR_0968 | molecular chaperone DnaJ                                           | 6  | 2  | 7  | 0,054% | 0,019% | 0,168% |
| HTSR_0969 | molecular chaperone DnaK                                           | 25 | 21 | 28 | 0,227% | 0,198% | 0,670% |

|           |                                                                                  |    |    |    |        |        |        |
|-----------|----------------------------------------------------------------------------------|----|----|----|--------|--------|--------|
| HTSR_0970 | molecular chaperone GrpE                                                         | 9  | 4  | 7  | 0,082% | 0,038% | 0,168% |
| HTSR_0971 | hypothetical protein                                                             | 1  | 0  | 1  | 0,009% | 0,000% | 0,024% |
| HTSR_0972 | hypothetical protein                                                             | 0  | 3  | 3  | 0,000% | 0,028% | 0,072% |
| HTSR_0973 | RNA methylase                                                                    | 4  | 5  | 1  | 0,036% | 0,047% | 0,024% |
| HTSR_0974 | 3-isopropylmalate dehydratase                                                    | 15 | 18 | 6  | 0,136% | 0,170% | 0,144% |
| HTSR_0975 | aspartate aminotransferase                                                       | 11 | 27 | 18 | 0,100% | 0,255% | 0,431% |
| HTSR_0976 | nitrate/nitrite transporter                                                      | 0  | 1  | 3  | 0,000% | 0,009% | 0,072% |
| HTSR_0977 | translation-associated GTPase                                                    | 4  | 8  | 5  | 0,036% | 0,076% | 0,120% |
| HTSR_0978 | hypothetical protein                                                             | 4  | 2  | 5  | 0,036% | 0,019% | 0,120% |
| HTSR_0979 | hypothetical protein                                                             | 3  | 2  | 1  | 0,027% | 0,019% | 0,024% |
| HTSR_0980 | hypothetical protein                                                             | 2  | 3  | 2  | 0,018% | 0,028% | 0,048% |
| HTSR_0981 | proteasome-activating nucleotidase                                               | 30 | 15 | 35 | 0,272% | 0,142% | 0,838% |
| HTSR_0982 | metallophosphoesterase                                                           | 2  | 0  | 3  | 0,018% | 0,000% | 0,072% |
| HTSR_0983 | chromosome segregation protein SMC                                               | 17 | 7  | 16 | 0,154% | 0,066% | 0,383% |
| HTSR_0984 | hypothetical protein                                                             | 0  | 0  | 0  | 0,000% | 0,000% | 0,000% |
| HTSR_0985 | hypothetical protein                                                             | 0  | 0  | 0  | 0,000% | 0,000% | 0,000% |
| HTSR_0986 | DNA polymerase I                                                                 | 28 | 54 | 35 | 0,254% | 0,510% | 0,838% |
| HTSR_0987 | signal transduction histidine kinase                                             | 0  | 0  | 4  | 0,000% | 0,000% | 0,096% |
| HTSR_0988 | lactoylglutathione lyase                                                         | 1  | 1  | 0  | 0,009% | 0,009% | 0,000% |
| HTSR_0989 | short-chain dehydrogenase                                                        | 3  | 8  | 6  | 0,027% | 0,076% | 0,144% |
| HTSR_0990 | FeS assembly ATPase SufC                                                         | 20 | 9  | 18 | 0,181% | 0,085% | 0,431% |
| HTSR_0991 | FeS assembly protein SufB                                                        | 13 | 2  | 14 | 0,118% | 0,019% | 0,335% |
| HTSR_0992 | FeS assembly protein SufD                                                        | 14 | 14 | 25 | 0,127% | 0,132% | 0,598% |
| HTSR_0994 | sulfatase                                                                        | 3  | 2  | 7  | 0,027% | 0,019% | 0,168% |
| HTSR_0995 | GtrA family protein                                                              | 0  | 0  | 0  | 0,000% | 0,000% | 0,000% |
| HTSR_0996 | hypothetical protein                                                             | 2  | 3  | 1  | 0,018% | 0,028% | 0,024% |
| HTSR_0997 | MscS Mechanosensitive ion channel                                                | 0  | 1  | 0  | 0,000% | 0,009% | 0,000% |
| HTSR_0998 | Na <sup>+</sup> /H <sup>+</sup> antiporter NhaC                                  | 1  | 3  | 0  | 0,009% | 0,028% | 0,000% |
| HTSR_0999 | hypothetical protein                                                             | 0  | 0  | 0  | 0,000% | 0,000% | 0,000% |
| HTSR_1000 | signal transduction protein with CBS domains                                     | 4  | 7  | 5  | 0,036% | 0,066% | 0,120% |
| HTSR_1001 | cold-shock protein                                                               | 3  | 1  | 1  | 0,027% | 0,009% | 0,024% |
| HTSR_1002 | metal dependent phosphohydrolase                                                 | 10 | 1  | 8  | 0,091% | 0,009% | 0,191% |
| HTSR_1003 | lysine transporter LysE                                                          | 0  | 0  | 0  | 0,000% | 0,000% | 0,000% |
| HTSR_1004 | threonine synthase                                                               | 0  | 1  | 3  | 0,000% | 0,009% | 0,072% |
| HTSR_1005 | putative GTPase                                                                  | 0  | 3  | 2  | 0,000% | 0,028% | 0,048% |
| HTSR_1006 | ornithine carbamoyltransferase                                                   | 16 | 11 | 8  | 0,145% | 0,104% | 0,191% |
| HTSR_1007 | glutamine ABC transporter permease                                               | 4  | 2  | 2  | 0,036% | 0,019% | 0,048% |
| HTSR_1008 | glutamine ABC transporter substrate-binding protein                              | 7  | 6  | 2  | 0,064% | 0,057% | 0,048% |
| HTSR_1009 | glutamine ABC transporter ATP-binding protein                                    | 3  | 2  | 3  | 0,027% | 0,019% | 0,072% |
| HTSR_1010 | polar amino acid ABC transporter inner membrane protein                          | 3  | 5  | 0  | 0,027% | 0,047% | 0,000% |
| HTSR_1011 | phytoene dehydrogenase                                                           | 11 | 24 | 16 | 0,100% | 0,227% | 0,383% |
| HTSR_1012 | putative phosphoesterase, ICC                                                    | 0  | 0  | 0  | 0,000% | 0,000% | 0,000% |
| HTSR_1013 | Crp/Fnr family transcriptional regulator                                         | 8  | 6  | 6  | 0,073% | 0,057% | 0,144% |
| HTSR_1014 | 3-isopropylmalate dehydratase                                                    | 9  | 8  | 5  | 0,082% | 0,076% | 0,120% |
| HTSR_1015 | Zn-ribbon RNA-binding protein                                                    | 0  | 0  | 0  | 0,000% | 0,000% | 0,000% |
| HTSR_1016 | translation initiation factor IF-2 subunit alpha                                 | 13 | 7  | 5  | 0,118% | 0,066% | 0,120% |
| HTSR_1017 | 30S ribosomal protein S27e                                                       | 3  | 3  | 4  | 0,027% | 0,028% | 0,096% |
| HTSR_1018 | 50S ribosomal protein L44e                                                       | 1  | 2  | 3  | 0,009% | 0,019% | 0,072% |
| HTSR_1019 | hypothetical protein                                                             | 2  | 2  | 0  | 0,018% | 0,019% | 0,000% |
| HTSR_1020 | hypothetical protein                                                             | 0  | 4  | 0  | 0,000% | 0,038% | 0,000% |
| HTSR_1021 | family 2 glycosyl transferase                                                    | 6  | 7  | 12 | 0,054% | 0,066% | 0,287% |
| HTSR_1022 | GtrA family protein                                                              | 0  | 0  | 0  | 0,000% | 0,000% | 0,000% |
| HTSR_1023 | adenine phosphoribosyltransferase                                                | 7  | 7  | 9  | 0,064% | 0,066% | 0,215% |
| HTSR_1024 | monovalent cation/H <sup>+</sup> antiporter subunit E                            | 11 | 20 | 11 | 0,100% | 0,189% | 0,263% |
| HTSR_1025 | monovalent cation/H <sup>+</sup> antiporter subunit F                            | 0  | 0  | 0  | 0,000% | 0,000% | 0,000% |
| HTSR_1026 | monovalent cation/H <sup>+</sup> antiporter subunit G                            | 0  | 1  | 0  | 0,000% | 0,009% | 0,000% |
| HTSR_1027 | monovalent cation/H <sup>+</sup> antiporter subunit B                            | 1  | 3  | 2  | 0,009% | 0,028% | 0,048% |
| HTSR_1028 | monovalent cation/H <sup>+</sup> antiporter subunit B                            | 0  | 0  | 0  | 0,000% | 0,000% | 0,000% |
| HTSR_1029 | monovalent cation/H <sup>+</sup> antiporter subunit C                            | 1  | 1  | 1  | 0,009% | 0,009% | 0,024% |
| HTSR_1030 | monovalent cation/H <sup>+</sup> antiporter subunit D                            | 1  | 0  | 2  | 0,009% | 0,000% | 0,048% |
| HTSR_1031 | monovalent cation/H <sup>+</sup> antiporter subunit D                            | 1  | 1  | 0  | 0,009% | 0,009% | 0,000% |
| HTSR_1032 | monovalent cation/H <sup>+</sup> antiporter subunit D                            | 3  | 5  | 0  | 0,027% | 0,047% | 0,000% |
| HTSR_1033 | phosphopantothenylocysteine decarboxylase / phosphopantothenate--cysteine ligase | 6  | 13 | 12 | 0,054% | 0,123% | 0,287% |
| HTSR_1034 | hypothetical protein                                                             | 0  | 0  | 1  | 0,000% | 0,000% | 0,024% |
| HTSR_1035 | geranylgeranyl diphosphate synthase, type I                                      | 5  | 6  | 8  | 0,045% | 0,057% | 0,191% |
| HTSR_1036 | hypothetical protein                                                             | 1  | 0  | 0  | 0,009% | 0,000% | 0,000% |
| HTSR_1037 | NAD <sup>+</sup> kinase                                                          | 3  | 5  | 5  | 0,027% | 0,047% | 0,120% |
| HTSR_1038 | endonuclease III                                                                 | 6  | 2  | 4  | 0,054% | 0,019% | 0,096% |
| HTSR_1039 | UbiD family decarboxylase                                                        | 13 | 22 | 13 | 0,118% | 0,208% | 0,311% |
| HTSR_1040 | hypothetical protein                                                             | 2  | 0  | 3  | 0,018% | 0,000% | 0,072% |
| HTSR_1041 | hypothetical protein                                                             | 0  | 0  | 0  | 0,000% | 0,000% | 0,000% |
| HTSR_1042 | 3-octaprenyl-4-hydroxybenzoate carboxy-lyase UbiX                                | 5  | 3  | 4  | 0,045% | 0,028% | 0,096% |
| HTSR_1043 | diphosphomevalonate decarboxylase                                                | 8  | 9  | 7  | 0,073% | 0,085% | 0,168% |
| HTSR_1044 | NADH dehydrogenase                                                               | 10 | 18 | 13 | 0,091% | 0,170% | 0,311% |
| HTSR_1045 | radical SAM protein, pyruvate-formate lyase-activating enzyme-like               | 1  | 7  | 1  | 0,009% | 0,066% | 0,024% |
| HTSR_1046 | class II aldolase                                                                | 0  | 1  | 0  | 0,000% | 0,009% | 0,000% |
| HTSR_1047 | S-methyl-5-thioribose-1-phosphate isomerase                                      | 10 | 19 | 9  | 0,091% | 0,179% | 0,215% |
| HTSR_1048 | thiamine-monophosphate kinase                                                    | 4  | 2  | 3  | 0,036% | 0,019% | 0,072% |
| HTSR_1050 | hypothetical protein                                                             | 0  | 2  | 1  | 0,000% | 0,019% | 0,024% |
| HTSR_1051 | hypothetical protein                                                             | 0  | 0  | 2  | 0,000% | 0,000% | 0,048% |
| HTSR_1052 | hypothetical protein                                                             | 0  | 2  | 0  | 0,000% | 0,019% | 0,000% |
| HTSR_1053 | (4Fe-4S)-binding protein                                                         | 2  | 22 | 12 | 0,018% | 0,208% | 0,287% |
| HTSR_1054 | pyrroline-5-carboxylate reductase                                                | 2  | 2  | 2  | 0,018% | 0,019% | 0,048% |
| HTSR_1055 | glutamate 5-kinase                                                               | 22 | 15 | 11 | 0,200% | 0,142% | 0,263% |
| HTSR_1056 | glutamate-5-semialdehyde dehydrogenase                                           | 34 | 19 | 19 | 0,309% | 0,179% | 0,455% |
| HTSR_1057 | hypothetical protein                                                             | 0  | 4  | 1  | 0,000% | 0,038% | 0,024% |
| HTSR_1058 | threonine synthase                                                               | 3  | 12 | 8  | 0,027% | 0,113% | 0,191% |
| HTSR_1059 | hypothetical protein                                                             | 1  | 2  | 6  | 0,009% | 0,019% | 0,144% |
| HTSR_1060 | hypothetical protein                                                             | 2  | 3  | 17 | 0,018% | 0,028% | 0,407% |
| HTSR_1061 | hypothetical protein                                                             | 1  | 0  | 0  | 0,009% | 0,000% | 0,000% |
| HTSR_1063 | tRNA (guanine37-N1)-methyltransferase                                            | 2  | 2  | 3  | 0,018% | 0,019% | 0,072% |
| HTSR_1064 | diphthine synthase                                                               | 0  | 2  | 3  | 0,000% | 0,019% | 0,072% |
| HTSR_1065 | GTP-binding protein                                                              | 7  | 10 | 11 | 0,064% | 0,094% | 0,263% |
| HTSR_1066 | 50S ribosomal protein L11                                                        | 5  | 3  | 6  | 0,045% | 0,028% | 0,144% |
| HTSR_1067 | 50S ribosomal protein L1                                                         | 18 | 15 | 15 | 0,163% | 0,142% | 0,359% |
| HTSR_1068 | 50S ribosomal protein L10                                                        | 17 | 14 | 11 | 0,154% | 0,132% | 0,263% |
| HTSR_1069 | 50S ribosomal protein L12                                                        | 0  | 0  | 0  | 0,000% | 0,000% | 0,000% |
| HTSR_1070 | hypothetical protein                                                             | 3  | 4  | 2  | 0,027% | 0,038% | 0,048% |
| HTSR_1071 | hypothetical protein                                                             | 6  | 8  | 6  | 0,054% | 0,076% | 0,144% |
| HTSR_1072 | RNA methyltransferase, TrmH family, group 1                                      | 1  | 4  | 5  | 0,009% | 0,038% | 0,120% |
| HTSR_1073 | multidrug DMT transporter                                                        | 0  | 0  | 2  | 0,000% | 0,000% | 0,048% |
| HTSR_1074 | AsnC family transcriptional regulator                                            | 8  | 12 | 3  | 0,073% | 0,113% | 0,072% |
| HTSR_1075 | hypothetical protein                                                             | 0  | 0  | 0  | 0,000% | 0,000% | 0,000% |
| HTSR_1076 | glutamyl-tRNA(Gln) amidotransferase subunit E                                    | 31 | 47 | 25 | 0,281% | 0,444% | 0,598% |
| HTSR_1077 | membrane protein                                                                 | 0  | 8  | 1  | 0,000% | 0,076% | 0,024% |

|           |                                                                                                                      |    |    |    |        |        |        |
|-----------|----------------------------------------------------------------------------------------------------------------------|----|----|----|--------|--------|--------|
| HTSR_1078 | hypothetical protein                                                                                                 | 3  | 2  | 2  | 0,027% | 0,019% | 0,048% |
| HTSR_1079 | fumarate hydratase, class II                                                                                         | 22 | 22 | 12 | 0,200% | 0,208% | 0,287% |
| HTSR_1080 | flap endonuclease-1                                                                                                  | 0  | 2  | 5  | 0,000% | 0,019% | 0,120% |
| HTSR_1081 | N-acetyltransferase GCN5                                                                                             | 0  | 2  | 2  | 0,000% | 0,019% | 0,048% |
| HTSR_1082 | menaquinone biosynthesis methyltransferase UbiE                                                                      | 0  | 0  | 3  | 0,000% | 0,000% | 0,072% |
| HTSR_1083 | hypothetical protein                                                                                                 | 1  | 1  | 2  | 0,009% | 0,009% | 0,048% |
| HTSR_1084 | hypothetical protein                                                                                                 | 0  | 0  | 0  | 0,000% | 0,000% | 0,000% |
| HTSR_1085 | signal recognition particle 19 kDa protein                                                                           | 2  | 0  | 1  | 0,018% | 0,000% | 0,024% |
| HTSR_1086 | glycyl aminopeptidase                                                                                                | 4  | 1  | 8  | 0,036% | 0,009% | 0,191% |
| HTSR_1087 | thermosome alpha subunit                                                                                             | 27 | 16 | 27 | 0,245% | 0,151% | 0,646% |
| HTSR_1088 | hypothetical protein                                                                                                 | 0  | 0  | 0  | 0,000% | 0,000% | 0,000% |
| HTSR_1089 | putative dioxygenase / Candidate gene for the hypothesized phosphomevalonate decarboxylase; COG1355, Predicted diox  | 3  | 8  | 3  | 0,027% | 0,076% | 0,072% |
| HTSR_1090 | DSBA oxidoreductase                                                                                                  | 2  | 3  | 9  | 0,018% | 0,028% | 0,215% |
| HTSR_1091 | cysteine desulfurase                                                                                                 | 5  | 14 | 15 | 0,045% | 0,132% | 0,359% |
| HTSR_1092 | thioredoxin domain protein                                                                                           | 2  | 0  | 0  | 0,018% | 0,000% | 0,000% |
| HTSR_1093 | TrmB family transcriptional regulator                                                                                | 1  | 0  | 0  | 0,009% | 0,000% | 0,000% |
| HTSR_1094 | pyridine nucleotide-disulfide oxidoreductase                                                                         | 8  | 17 | 14 | 0,073% | 0,161% | 0,335% |
| HTSR_1095 | SAM-dependent methyltransferase                                                                                      | 4  | 12 | 8  | 0,036% | 0,113% | 0,191% |
| HTSR_1096 | hypothetical protein                                                                                                 | 3  | 1  | 0  | 0,027% | 0,009% | 0,000% |
| HTSR_1097 | peroxiredoxin                                                                                                        | 22 | 16 | 14 | 0,200% | 0,151% | 0,335% |
| HTSR_1098 | deoxyribodipyrimidine photo-lyase                                                                                    | 13 | 18 | 30 | 0,118% | 0,170% | 0,718% |
| HTSR_1099 | superoxide dismutase, Fe-Mn family                                                                                   | 2  | 1  | 1  | 0,018% | 0,009% | 0,024% |
| HTSR_1100 | hypothetical protein                                                                                                 | 0  | 0  | 1  | 0,000% | 0,000% | 0,024% |
| HTSR_1102 | threonine dehydrogenase and related Zn-dependent dehydrogenases                                                      | 8  | 24 | 1  | 0,073% | 0,227% | 0,024% |
| HTSR_1103 | transposase, IS605 OrfB family                                                                                       | 0  | 0  | 11 | 0,000% | 0,000% | 0,263% |
| HTSR_1104 | putative NADP-dependent oxidoreductase YncB                                                                          | 5  | 14 | 3  | 0,045% | 0,132% | 0,072% |
| HTSR_1105 | 1,4-dihydroxy-2-naphthoate octaprenyltransferase                                                                     | 0  | 0  | 0  | 0,000% | 0,000% | 0,000% |
| HTSR_1106 | methyltransferase type 11 / 2-heptaprenyl-1,4-naphthoquinone methyltransferase (EC 2.1.1.163)                        | 0  | 0  | 1  | 0,000% | 0,000% | 0,024% |
| HTSR_1107 | dihydroxy-acid dehydratase                                                                                           | 1  | 5  | 5  | 0,009% | 0,047% | 0,120% |
| HTSR_1108 | major facilitator superfamily MFS_1                                                                                  | 0  | 0  | 0  | 0,000% | 0,000% | 0,000% |
| HTSR_1109 | transposase, IS605 OrfB family                                                                                       | 0  | 0  | 0  | 0,000% | 0,000% | 0,000% |
| HTSR_1110 | sugar phosphate permease                                                                                             | 0  | 0  | 0  | 0,000% | 0,000% | 0,000% |
| HTSR_1111 | catalase/peroxidase HPI                                                                                              | 9  | 32 | 8  | 0,082% | 0,302% | 0,191% |
| HTSR_1112 | hypothetical protein                                                                                                 | 0  | 0  | 0  | 0,000% | 0,000% | 0,000% |
| HTSR_1113 | hypothetical protein                                                                                                 | 0  | 0  | 0  | 0,000% | 0,000% | 0,000% |
| HTSR_1114 | hypothetical protein / Molybdenum cofactor biosynthesis protein MoaD                                                 | 0  | 0  | 0  | 0,000% | 0,000% | 0,000% |
| HTSR_1115 | hypothetical protein                                                                                                 | 0  | 0  | 0  | 0,000% | 0,000% | 0,000% |
| HTSR_1116 | multi-sensor signal transduction histidine kinase                                                                    | 0  | 4  | 2  | 0,000% | 0,038% | 0,048% |
| HTSR_1117 | hypothetical protein                                                                                                 | 0  | 0  | 0  | 0,000% | 0,000% | 0,000% |
| HTSR_1118 | universal stress protein UspA                                                                                        | 6  | 10 | 10 | 0,054% | 0,094% | 0,239% |
| HTSR_1119 | hypothetical protein                                                                                                 | 0  | 0  | 0  | 0,000% | 0,000% | 0,000% |
| HTSR_1120 | mechanosensitive ion channel                                                                                         | 4  | 14 | 1  | 0,036% | 0,132% | 0,024% |
| HTSR_1121 | FAD synthase                                                                                                         | 1  | 2  | 1  | 0,009% | 0,019% | 0,024% |
| HTSR_1122 | aminoglycoside phosphotransferase                                                                                    | 0  | 2  | 3  | 0,000% | 0,019% | 0,072% |
| HTSR_1123 | apolipoprotein N-acyltransferase                                                                                     | 1  | 6  | 14 | 0,009% | 0,057% | 0,335% |
| HTSR_1124 | polyketide cyclase/dehydrase                                                                                         | 6  | 11 | 12 | 0,054% | 0,104% | 0,287% |
| HTSR_1125 | hypothetical protein                                                                                                 | 0  | 1  | 0  | 0,000% | 0,009% | 0,000% |
| HTSR_1126 | phosphate uptake regulator PhoU                                                                                      | 5  | 7  | 14 | 0,045% | 0,066% | 0,335% |
| HTSR_1127 | N-acetylglucosamine-1-phosphate uridylyltransferase                                                                  | 15 | 16 | 9  | 0,136% | 0,151% | 0,215% |
| HTSR_1128 | competence/damage-inducible protein CinA                                                                             | 1  | 1  | 1  | 0,009% | 0,009% | 0,024% |
| HTSR_1129 | hypothetical protein                                                                                                 | 3  | 2  | 6  | 0,027% | 0,019% | 0,144% |
| HTSR_1130 | hypothetical protein                                                                                                 | 4  | 7  | 3  | 0,036% | 0,066% | 0,072% |
| HTSR_1131 | transcription factor TFIIE subunit alpha                                                                             | 8  | 10 | 4  | 0,073% | 0,094% | 0,096% |
| HTSR_1132 | tRNA (cytidine(56)-2'-O)-methyltransferase                                                                           | 2  | 1  | 1  | 0,018% | 0,009% | 0,024% |
| HTSR_1133 | UDP-glucose 4-epimerase                                                                                              | 6  | 14 | 17 | 0,054% | 0,132% | 0,407% |
| HTSR_1134 | PadR family transcriptional regulator                                                                                | 4  | 3  | 2  | 0,036% | 0,028% | 0,048% |
| HTSR_1135 | S-layer domain-containing protein                                                                                    | 15 | 9  | 11 | 0,136% | 0,085% | 0,263% |
| HTSR_1136 | RND transporter                                                                                                      | 0  | 2  | 0  | 0,000% | 0,019% | 0,000% |
| HTSR_1137 | cation diffusion facilitator family transporter                                                                      | 0  | 1  | 1  | 0,000% | 0,009% | 0,024% |
| HTSR_1138 | hypothetical protein                                                                                                 | 0  | 0  | 3  | 0,000% | 0,000% | 0,072% |
| HTSR_1139 | transcription initiation factor IIB                                                                                  | 9  | 7  | 27 | 0,082% | 0,066% | 0,646% |
| HTSR_1140 | hypothetical protein                                                                                                 | 2  | 2  | 0  | 0,018% | 0,019% | 0,000% |
| HTSR_1141 | RNA 3'-terminal phosphate cyclase (ATP)                                                                              | 0  | 9  | 11 | 0,000% | 0,085% | 0,263% |
| HTSR_1142 | hypothetical protein                                                                                                 | 1  | 0  | 1  | 0,009% | 0,000% | 0,024% |
| HTSR_1143 | 2-dehydropanoate 2-reductase                                                                                         | 0  | 2  | 7  | 0,000% | 0,019% | 0,168% |
| HTSR_1144 | phosphoglycolate phosphatase                                                                                         | 2  | 5  | 2  | 0,018% | 0,047% | 0,048% |
| HTSR_1145 | hypothetical protein                                                                                                 | 0  | 1  | 0  | 0,000% | 0,009% | 0,000% |
| HTSR_1146 | TrmB family transcriptional regulator                                                                                | 5  | 1  | 4  | 0,045% | 0,009% | 0,096% |
| HTSR_1147 | molybdopterin-guanine dinucleotide biosynthesis protein B                                                            | 4  | 8  | 7  | 0,036% | 0,076% | 0,168% |
| HTSR_1148 | hypothetical protein                                                                                                 | 11 | 10 | 7  | 0,100% | 0,094% | 0,168% |
| HTSR_1149 | hypothetical protein                                                                                                 | 2  | 0  | 0  | 0,018% | 0,000% | 0,000% |
| HTSR_1150 | hypothetical protein                                                                                                 | 0  | 0  | 0  | 0,000% | 0,000% | 0,000% |
| HTSR_1151 | mechanosensitive ion channel MscS                                                                                    | 3  | 9  | 2  | 0,027% | 0,085% | 0,048% |
| HTSR_1152 | electron transfer flavoprotein                                                                                       | 16 | 4  | 14 | 0,145% | 0,038% | 0,335% |
| HTSR_1153 | endonuclease III                                                                                                     | 0  | 0  | 2  | 0,000% | 0,000% | 0,048% |
| HTSR_1154 | hypothetical protein                                                                                                 | 3  | 5  | 5  | 0,027% | 0,047% | 0,120% |
| HTSR_1155 | TrkA-N domain protein                                                                                                | 8  | 20 | 3  | 0,073% | 0,189% | 0,072% |
| HTSR_1156 | AsnC family transcriptional regulator                                                                                | 5  | 9  | 3  | 0,045% | 0,085% | 0,072% |
| HTSR_1157 | ATPase P                                                                                                             | 1  | 0  | 3  | 0,009% | 0,000% | 0,072% |
| HTSR_1158 | heavy metal transport/detoxification protein                                                                         | 0  | 0  | 0  | 0,000% | 0,000% | 0,000% |
| HTSR_1159 | hypothetical protein                                                                                                 | 0  | 0  | 0  | 0,000% | 0,000% | 0,000% |
| HTSR_1160 | uracil-DNA glycosylase                                                                                               | 1  | 0  | 1  | 0,009% | 0,000% | 0,024% |
| HTSR_1161 | ribose-bisphosphate carboxylase large chain                                                                          | 7  | 17 | 10 | 0,064% | 0,161% | 0,239% |
| HTSR_1162 | fructose-1,6-bisphosphatase I                                                                                        | 6  | 6  | 7  | 0,054% | 0,057% | 0,168% |
| HTSR_1163 | fructose-bisphosphate aldolase, class I                                                                              | 12 | 17 | 9  | 0,109% | 0,161% | 0,215% |
| HTSR_1164 | hypothetical protein                                                                                                 | 3  | 0  | 3  | 0,027% | 0,000% | 0,072% |
| HTSR_1165 | 3-ketoacyl-CoA thiolase                                                                                              | 28 | 20 | 14 | 0,254% | 0,189% | 0,335% |
| HTSR_1166 | hypothetical protein                                                                                                 | 5  | 3  | 1  | 0,045% | 0,028% | 0,024% |
| HTSR_1167 | CBS/parB domain-containing protein                                                                                   | 13 | 7  | 3  | 0,118% | 0,066% | 0,072% |
| HTSR_1168 | D-glycerate dehydrogenase                                                                                            | 22 | 18 | 18 | 0,200% | 0,170% | 0,431% |
| HTSR_1169 | aspartate aminotransferase                                                                                           | 27 | 36 | 26 | 0,245% | 0,340% | 0,622% |
| HTSR_1170 | DHH family phosphoesterase / Kef-type K+ transport systems (NAD-binding component fused to domain related to exopoly | 1  | 3  | 1  | 0,009% | 0,028% | 0,024% |
| HTSR_1171 | NADH-quinone oxidoreductase subunit N                                                                                | 4  | 2  | 3  | 0,036% | 0,019% | 0,072% |
| HTSR_1172 | NADH-quinone oxidoreductase subunit M                                                                                | 2  | 3  | 1  | 0,018% | 0,028% | 0,024% |
| HTSR_1173 | NADH-quinone oxidoreductase subunit L                                                                                | 1  | 3  | 1  | 0,009% | 0,028% | 0,024% |
| HTSR_1174 | NADH-quinone oxidoreductase subunit K                                                                                | 1  | 4  | 2  | 0,009% | 0,038% | 0,048% |
| HTSR_1175 | NADH-quinone oxidoreductase subunit J2                                                                               | 1  | 1  | 1  | 0,009% | 0,009% | 0,024% |
| HTSR_1176 | NADH-quinone oxidoreductase subunit J                                                                                | 0  | 0  | 0  | 0,000% | 0,000% | 0,000% |
| HTSR_1177 | NADH-quinone oxidoreductase subunit I                                                                                | 2  | 4  | 3  | 0,018% | 0,038% | 0,072% |
| HTSR_1178 | NADH-quinone oxidoreductase subunit H                                                                                | 6  | 6  | 4  | 0,054% | 0,057% | 0,096% |
| HTSR_1179 | NADH-quinone oxidoreductase subunit C                                                                                | 36 | 48 | 47 | 0,327% | 0,453% | 1,125% |
| HTSR_1180 | NADH-quinone oxidoreductase subunit B                                                                                | 13 | 17 | 21 | 0,118% | 0,161% | 0,503% |
| HTSR_1181 | NADH-quinone oxidoreductase subunit A                                                                                | 7  | 5  | 3  | 0,064% | 0,047% | 0,072% |
| HTSR_1182 | Fe-S oxidoreductase                                                                                                  | 11 | 0  | 25 | 0,100% | 0,000% | 0,598% |
| HTSR_1183 | phosphoribosylaminoimidazole carboxylase, catalytic subunit                                                          | 6  | 10 | 6  | 0,054% | 0,094% | 0,144% |

|           |                                                                             |    |    |    |        |        |        |
|-----------|-----------------------------------------------------------------------------|----|----|----|--------|--------|--------|
| HTSR_1184 | phosphoribosylaminoimidazole carboxylase, ATPase subunit                    | 14 | 19 | 17 | 0,127% | 0,179% | 0,407% |
| HTSR_1185 | membrane-bound mannose 6-phosphotransferase                                 | 1  | 7  | 2  | 0,009% | 0,066% | 0,048% |
| HTSR_1186 | hypothetical protein                                                        | 0  | 0  | 0  | 0,000% | 0,000% | 0,000% |
| HTSR_1187 | 6,7-dimethyl-8-ribityllumazine synthase                                     | 7  | 7  | 4  | 0,064% | 0,066% | 0,096% |
| HTSR_1188 | aspartate aminotransferase                                                  | 11 | 14 | 7  | 0,100% | 0,132% | 0,168% |
| HTSR_1189 | glutamate dehydrogenase (NADP+)                                             | 10 | 22 | 30 | 0,091% | 0,208% | 0,718% |
| HTSR_1190 | hypothetical protein                                                        | 0  | 3  | 5  | 0,000% | 0,028% | 0,120% |
| HTSR_1191 | hypothetical protein                                                        | 2  | 4  | 2  | 0,018% | 0,038% | 0,048% |
| HTSR_1192 | hypothetical protein                                                        | 3  | 3  | 3  | 0,027% | 0,028% | 0,072% |
| HTSR_1193 | glycosyl transferase group 1                                                | 0  | 6  | 6  | 0,000% | 0,057% | 0,144% |
| HTSR_1194 | glycosyl transferase group 1                                                | 3  | 8  | 13 | 0,027% | 0,076% | 0,311% |
| HTSR_1195 | ribonuclease P, Rpr2/Rpp21 subunit                                          | 0  | 0  | 3  | 0,000% | 0,000% | 0,072% |
| HTSR_1196 | RNA-binding protein YhbY                                                    | 1  | 1  | 2  | 0,009% | 0,009% | 0,048% |
| HTSR_1197 | mechanosensitive ion channel protein                                        | 7  | 13 | 8  | 0,064% | 0,123% | 0,191% |
| HTSR_1198 | hypothetical protein                                                        | 3  | 3  | 2  | 0,027% | 0,028% | 0,048% |
| HTSR_1199 | UbiA prenyltransferase                                                      | 1  | 1  | 0  | 0,009% | 0,009% | 0,000% |
| HTSR_1200 | hypothetical protein                                                        | 6  | 2  | 0  | 0,054% | 0,019% | 0,000% |
| HTSR_1202 | short-chain dehydrogenase/reductase SDR                                     | 3  | 7  | 2  | 0,027% | 0,066% | 0,048% |
| HTSR_1203 | hypothetical protein                                                        | 0  | 0  | 0  | 0,000% | 0,000% | 0,000% |
| HTSR_1204 | putative endonuclease containing a URI domain protein                       | 0  | 0  | 2  | 0,000% | 0,000% | 0,048% |
| HTSR_1205 | 4-hydroxybenzoate polyprenyltransferase                                     | 0  | 0  | 0  | 0,000% | 0,000% | 0,000% |
| HTSR_1206 | PAS domain S-box                                                            | 0  | 2  | 1  | 0,000% | 0,019% | 0,024% |
| HTSR_1208 | hypothetical protein                                                        | 0  | 0  | 9  | 0,000% | 0,000% | 0,215% |
| HTSR_1209 | hypothetical protein                                                        | 0  | 0  | 5  | 0,000% | 0,000% | 0,120% |
| HTSR_1210 | hypothetical protein                                                        | 0  | 0  | 0  | 0,000% | 0,000% | 0,000% |
| HTSR_1211 | hypothetical protein                                                        | 1  | 0  | 0  | 0,009% | 0,000% | 0,000% |
| HTSR_1212 | hypothetical protein                                                        | 0  | 0  | 1  | 0,000% | 0,000% | 0,024% |
| HTSR_1213 | hypothetical protein                                                        | 0  | 0  | 2  | 0,000% | 0,000% | 0,048% |
| HTSR_1214 | type II secretion system protein F                                          | 4  | 0  | 1  | 0,036% | 0,000% | 0,024% |
| HTSR_1215 | type II secretion system protein E                                          | 13 | 19 | 31 | 0,118% | 0,179% | 0,742% |
| HTSR_1216 | hypothetical protein                                                        | 0  | 4  | 7  | 0,000% | 0,038% | 0,168% |
| HTSR_1217 | ArsR family transcriptional regulator                                       | 5  | 2  | 7  | 0,045% | 0,019% | 0,168% |
| HTSR_1218 | dihydroxy-acid dehydratase                                                  | 15 | 7  | 22 | 0,136% | 0,066% | 0,527% |
| HTSR_1219 | deoxyribonuclease/TRAM domain-containing protein                            | 5  | 5  | 4  | 0,045% | 0,047% | 0,096% |
| HTSR_1220 | methylentetrahydrofolate reductase (NADPH)                                  | 30 | 51 | 22 | 0,272% | 0,482% | 0,527% |
| HTSR_1221 | hypothetical protein                                                        | 8  | 9  | 11 | 0,073% | 0,085% | 0,263% |
| HTSR_1222 | universal stress protein UspA                                               | 4  | 17 | 14 | 0,036% | 0,161% | 0,335% |
| HTSR_1223 | hypothetical protein                                                        | 3  | 7  | 2  | 0,027% | 0,066% | 0,048% |
| HTSR_1224 | PAS domain-containing sensor histidine kinase                               | 4  | 2  | 13 | 0,036% | 0,019% | 0,311% |
| HTSR_1225 | histidine kinase                                                            | 8  | 11 | 5  | 0,073% | 0,104% | 0,120% |
| HTSR_1226 | type I phosphodiesterase/nucleotide pyrophosphatase                         | 20 | 21 | 18 | 0,181% | 0,198% | 0,431% |
| HTSR_1227 | glycosyl transferase family 2                                               | 0  | 0  | 5  | 0,000% | 0,000% | 0,120% |
| HTSR_1228 | hypothetical protein                                                        | 1  | 1  | 2  | 0,009% | 0,009% | 0,048% |
| HTSR_1229 | polysaccharide deacetylase                                                  | 0  | 0  | 8  | 0,000% | 0,000% | 0,191% |
| HTSR_1230 | hypothetical protein                                                        | 0  | 3  | 1  | 0,000% | 0,028% | 0,024% |
| HTSR_1231 | dolichyl-phosphate-mannose-protein mannosyltransferase                      | 0  | 1  | 0  | 0,000% | 0,009% | 0,000% |
| HTSR_1232 | MATE family efflux transporter                                              | 0  | 0  | 1  | 0,000% | 0,000% | 0,024% |
| HTSR_1233 | universal stress protein UspA                                               | 4  | 14 | 19 | 0,036% | 0,132% | 0,455% |
| HTSR_1234 | hypothetical protein                                                        | 6  | 15 | 3  | 0,054% | 0,142% | 0,072% |
| HTSR_1235 | hypothetical protein / YbaK/prolyl-tRNA synthetase associated region        | 1  | 1  | 0  | 0,009% | 0,009% | 0,000% |
| HTSR_1236 | hypothetical protein                                                        | 0  | 0  | 0  | 0,000% | 0,000% | 0,000% |
| HTSR_1237 | hypothetical protein                                                        | 0  | 0  | 0  | 0,000% | 0,000% | 0,000% |
| HTSR_1238 | phosphoesterase RecJ domain protein                                         | 36 | 30 | 26 | 0,327% | 0,283% | 0,622% |
| HTSR_1239 | phospholipase D/transphosphatidylase                                        | 0  | 0  | 0  | 0,000% | 0,000% | 0,000% |
| HTSR_1240 | hypothetical protein                                                        | 0  | 0  | 0  | 0,000% | 0,000% | 0,000% |
| HTSR_1241 | PBS lyase HEAT-like repeat domain-containing protein                        | 30 | 28 | 20 | 0,272% | 0,265% | 0,479% |
| HTSR_1242 | CDP-diacylglycerol-serine O-phosphatidyltransferase                         | 0  | 0  | 0  | 0,000% | 0,000% | 0,000% |
| HTSR_1243 | 30S ribosomal protein S3Ae                                                  | 15 | 16 | 25 | 0,136% | 0,151% | 0,598% |
| HTSR_1244 | hypothetical protein                                                        | 0  | 0  | 0  | 0,000% | 0,000% | 0,000% |
| HTSR_1245 | hypothetical protein                                                        | 0  | 1  | 5  | 0,000% | 0,009% | 0,120% |
| HTSR_1246 | 30S ribosomal protein S15                                                   | 16 | 11 | 22 | 0,145% | 0,104% | 0,527% |
| HTSR_1248 | hypothetical protein                                                        | 5  | 11 | 1  | 0,045% | 0,104% | 0,024% |
| HTSR_1249 | beta-lactamase domain protein                                               | 0  | 0  | 1  | 0,000% | 0,000% | 0,024% |
| HTSR_1250 | P-type ATPase                                                               | 0  | 4  | 0  | 0,000% | 0,038% | 0,000% |
| HTSR_1251 | mgcC family protein                                                         | 0  | 1  | 0  | 0,000% | 0,009% | 0,000% |
| HTSR_1252 | glutamate-1-semialdehyde aminotransferase                                   | 15 | 20 | 11 | 0,136% | 0,189% | 0,263% |
| HTSR_1253 | dihydrodipicolinate reductase                                               | 3  | 11 | 4  | 0,027% | 0,104% | 0,096% |
| HTSR_1254 | CBS domain-containing protein                                               | 2  | 1  | 3  | 0,018% | 0,009% | 0,072% |
| HTSR_1255 | hypothetical protein                                                        | 0  | 3  | 0  | 0,000% | 0,028% | 0,000% |
| HTSR_1256 | hypothetical protein                                                        | 1  | 6  | 3  | 0,009% | 0,057% | 0,072% |
| HTSR_1257 | hypothetical protein                                                        | 0  | 0  | 0  | 0,000% | 0,000% | 0,000% |
| HTSR_1258 | cysteine synthase                                                           | 0  | 0  | 0  | 0,000% | 0,000% | 0,000% |
| HTSR_1259 | endonuclease                                                                | 0  | 0  | 4  | 0,000% | 0,000% | 0,096% |
| HTSR_1260 | hypothetical protein                                                        | 0  | 0  | 0  | 0,000% | 0,000% | 0,000% |
| HTSR_1261 | phosphoenolpyruvate carboxylase                                             | 52 | 59 | 49 | 0,472% | 0,557% | 1,173% |
| HTSR_1262 | hypothetical protein                                                        | 2  | 5  | 6  | 0,018% | 0,047% | 0,144% |
| HTSR_1263 | DtxR family transcriptional regulator                                       | 7  | 0  | 3  | 0,064% | 0,000% | 0,072% |
| HTSR_1264 | hypothetical protein                                                        | 1  | 0  | 1  | 0,009% | 0,000% | 0,024% |
| HTSR_1265 | hypothetical protein                                                        | 0  | 0  | 1  | 0,000% | 0,000% | 0,024% |
| HTSR_1266 | MATE family drug/sodium antiporter                                          | 1  | 0  | 0  | 0,009% | 0,000% | 0,000% |
| HTSR_1267 | hypothetical protein                                                        | 0  | 0  | 0  | 0,000% | 0,000% | 0,000% |
| HTSR_1268 | hypothetical protein                                                        | 0  | 0  | 0  | 0,000% | 0,000% | 0,000% |
| HTSR_1269 | IS1341-type transposase                                                     | 0  | 0  | 0  | 0,000% | 0,000% | 0,000% |
| HTSR_1270 | prolyl-tRNA synthetase                                                      | 13 | 16 | 14 | 0,118% | 0,151% | 0,335% |
| HTSR_1271 | SOUL heme-binding protein                                                   | 9  | 25 | 10 | 0,082% | 0,236% | 0,239% |
| HTSR_1272 | short-chain dehydrogenase/reductase SDR                                     | 10 | 15 | 19 | 0,091% | 0,142% | 0,455% |
| HTSR_1273 | hypothetical protein                                                        | 0  | 1  | 0  | 0,000% | 0,009% | 0,000% |
| HTSR_1274 | hypothetical protein                                                        | 1  | 1  | 1  | 0,009% | 0,009% | 0,024% |
| HTSR_1275 | ferrous iron transporter FeoB                                               | 4  | 4  | 4  | 0,036% | 0,038% | 0,096% |
| HTSR_1276 | hypothetical protein                                                        | 10 | 7  | 6  | 0,091% | 0,066% | 0,144% |
| HTSR_1277 | histone deacetylase family protein                                          | 3  | 4  | 5  | 0,027% | 0,038% | 0,120% |
| HTSR_1278 | hydantoinase/oxoprolinase                                                   | 9  | 14 | 22 | 0,082% | 0,132% | 0,527% |
| HTSR_1279 | hypothetical protein                                                        | 0  | 0  | 0  | 0,000% | 0,000% | 0,000% |
| HTSR_1280 | cysteinyl-tRNA synthetase                                                   | 25 | 31 | 17 | 0,227% | 0,293% | 0,407% |
| HTSR_1281 | hypothetical protein                                                        | 0  | 4  | 4  | 0,000% | 0,038% | 0,096% |
| HTSR_1282 | hypothetical protein                                                        | 2  | 5  | 2  | 0,018% | 0,047% | 0,048% |
| HTSR_1283 | hypothetical protein                                                        | 1  | 0  | 0  | 0,009% | 0,000% | 0,000% |
| HTSR_1284 | adenylosuccinate synthetase                                                 | 38 | 26 | 25 | 0,345% | 0,246% | 0,598% |
| HTSR_1285 | hypothetical protein                                                        | 7  | 5  | 7  | 0,064% | 0,047% | 0,168% |
| HTSR_1286 | hypothetical protein                                                        | 18 | 16 | 14 | 0,163% | 0,151% | 0,335% |
| HTSR_1287 | metal-binding protein                                                       | 3  | 0  | 1  | 0,027% | 0,000% | 0,024% |
| HTSR_1288 | cell surface protein                                                        | 0  | 0  | 0  | 0,000% | 0,000% | 0,000% |
| HTSR_1289 | sulfite oxidase-like oxidoreductase                                         | 1  | 0  | 4  | 0,009% | 0,000% | 0,096% |
| HTSR_1290 | isochorismate synthase                                                      | 6  | 3  | 12 | 0,054% | 0,028% | 0,287% |
| HTSR_1291 | 2-succinyl-5-enolpyruvyl-6-hydroxy-3-cyclohexene-1-carboxylic-acid synthase | 11 | 15 | 15 | 0,100% | 0,142% | 0,359% |



|           |                                                                                |    |    |    |        |        |        |
|-----------|--------------------------------------------------------------------------------|----|----|----|--------|--------|--------|
| HTSR_1292 | naphthoate synthase                                                            | 11 | 22 | 15 | 0,100% | 0,208% | 0,359% |
| HTSR_1293 | 1,4-dihydroxy-2-naphthoate octaprenyltransferase                               | 1  | 3  | 3  | 0,009% | 0,028% | 0,072% |
| HTSR_1294 | O-succinylbenzoate synthase                                                    | 0  | 2  | 2  | 0,000% | 0,019% | 0,048% |
| HTSR_1295 | O-succinylbenzoate-CoA ligase                                                  | 3  | 17 | 11 | 0,027% | 0,161% | 0,263% |
| HTSR_1296 | transcription repressor                                                        | 6  | 5  | 3  | 0,054% | 0,047% | 0,072% |
| HTSR_1297 | aspartyl-tRNA(Asn)/glutamyl-tRNA(Gln) amidotransferase subunit A               | 17 | 14 | 22 | 0,154% | 0,132% | 0,527% |
| HTSR_1298 | aspartyl-tRNA(Asn)/glutamyl-tRNA(Gln) amidotransferase subunit C               | 2  | 2  | 1  | 0,018% | 0,019% | 0,024% |
| HTSR_1299 | phosphoesterase                                                                | 2  | 0  | 5  | 0,018% | 0,000% | 0,120% |
| HTSR_1300 | phosphoribosylformylglycinamide synthase II                                    | 18 | 33 | 23 | 0,163% | 0,312% | 0,551% |
| HTSR_1301 | hypothetical protein                                                           | 0  | 0  | 1  | 0,000% | 0,000% | 0,024% |
| HTSR_1302 | hypothetical protein                                                           | 0  | 0  | 0  | 0,000% | 0,000% | 0,000% |
| HTSR_1303 | imidazole glycerol phosphate synthase subunit HisF                             | 4  | 4  | 2  | 0,036% | 0,038% | 0,048% |
| HTSR_1304 | DNA-directed RNA polymerase subunit L                                          | 3  | 1  | 2  | 0,027% | 0,009% | 0,048% |
| HTSR_1305 | rhomboid family protein                                                        | 0  | 0  | 0  | 0,000% | 0,000% | 0,000% |
| HTSR_1306 | RNA methylase                                                                  | 0  | 0  | 0  | 0,000% | 0,000% | 0,000% |
| HTSR_1307 | diphthamide biosynthesis protein                                               | 1  | 0  | 9  | 0,009% | 0,000% | 0,215% |
| HTSR_1308 | beta-lactamase domain protein                                                  | 3  | 0  | 1  | 0,027% | 0,000% | 0,024% |
| HTSR_1309 | hypothetical protein                                                           | 25 | 2  | 15 | 0,227% | 0,019% | 0,359% |
| HTSR_1310 | hypothetical protein                                                           | 2  | 1  | 2  | 0,018% | 0,009% | 0,048% |
| HTSR_1311 | phosphate transport system regulatory protein PhoU                             | 13 | 11 | 9  | 0,118% | 0,104% | 0,215% |
| HTSR_1312 | ferredoxin                                                                     | 2  | 1  | 1  | 0,018% | 0,009% | 0,024% |
| HTSR_1313 | geranylgeranyl reductase                                                       | 18 | 17 | 12 | 0,163% | 0,161% | 0,287% |
| HTSR_1314 | Na <sup>+</sup> /H <sup>+</sup> antiporter NhaC                                | 8  | 11 | 2  | 0,073% | 0,104% | 0,048% |
| HTSR_1315 | hypothetical protein                                                           | 2  | 8  | 2  | 0,018% | 0,076% | 0,048% |
| HTSR_1316 | 30S ribosomal protein S10b                                                     | 1  | 2  | 8  | 0,009% | 0,019% | 0,191% |
| HTSR_1317 | NUDIX hydrolase                                                                | 7  | 4  | 11 | 0,064% | 0,038% | 0,263% |
| HTSR_1318 | hypothetical protein                                                           | 0  | 2  | 2  | 0,000% | 0,019% | 0,048% |
| HTSR_1319 | major facilitator superfamily MFS_1                                            | 0  | 0  | 0  | 0,000% | 0,000% | 0,000% |
| HTSR_1320 | transcription termination factor Tfs                                           | 0  | 0  | 1  | 0,000% | 0,000% | 0,024% |
| HTSR_1321 | tRNA (adenine57-N1/adenine58-N1)-methyltransferase                             | 1  | 3  | 1  | 0,009% | 0,028% | 0,024% |
| HTSR_1322 | nascent polypeptide-associated complex protein                                 | 5  | 1  | 2  | 0,045% | 0,009% | 0,048% |
| HTSR_1323 | PUA domain containing protein                                                  | 1  | 2  | 3  | 0,009% | 0,019% | 0,072% |
| HTSR_1324 | cationic amino acid transporter                                                | 0  | 0  | 0  | 0,000% | 0,000% | 0,000% |
| HTSR_1326 | universal stress protein UspA                                                  | 10 | 9  | 8  | 0,091% | 0,085% | 0,191% |
| HTSR_1327 | NYN domain-containing protein                                                  | 2  | 3  | 5  | 0,018% | 0,028% | 0,120% |
| HTSR_1328 | metallophosphoesterase                                                         | 1  | 3  | 1  | 0,009% | 0,028% | 0,024% |
| HTSR_1329 | 4-hydroxy-tetrahydrodipicolinate synthase                                      | 29 | 21 | 11 | 0,263% | 0,198% | 0,263% |
| HTSR_1330 | 4-hydroxy-tetrahydrodipicolinate reductase                                     | 8  | 11 | 6  | 0,073% | 0,104% | 0,144% |
| HTSR_1331 | 2,3,4,5-tetrahydropyridine-2-carboxylate N-succinyltransferase                 | 15 | 12 | 11 | 0,136% | 0,113% | 0,263% |
| HTSR_1332 | diaminopimelate decarboxylase                                                  | 17 | 16 | 17 | 0,154% | 0,151% | 0,407% |
| HTSR_1333 | diaminopimelate epimerase                                                      | 11 | 4  | 4  | 0,100% | 0,038% | 0,096% |
| HTSR_1334 | succinyl-diaminopimelate desuccinylase                                         | 7  | 16 | 10 | 0,064% | 0,151% | 0,239% |
| HTSR_1335 | adenylosuccinate lyase                                                         | 23 | 29 | 29 | 0,209% | 0,274% | 0,694% |
| HTSR_1336 | phosphoribosylaminoimidazolecarboxamide formyltransferase / IMP cyclohydrolase | 16 | 29 | 21 | 0,145% | 0,274% | 0,503% |
| HTSR_1337 | ferrochelatase                                                                 | 9  | 20 | 5  | 0,082% | 0,189% | 0,120% |
| HTSR_1338 | uroporphyrinogen decarboxylase                                                 | 4  | 14 | 13 | 0,036% | 0,132% | 0,311% |
| HTSR_1339 | glycosyl transferase family 1                                                  | 6  | 14 | 22 | 0,054% | 0,132% | 0,527% |
| HTSR_1340 | guanosine monophosphate reductase                                              | 5  | 16 | 11 | 0,045% | 0,151% | 0,263% |
| HTSR_1341 | glycerol-1-phosphate dehydrogenase [NAD(P) <sup>+</sup> ]                      | 16 | 25 | 20 | 0,145% | 0,236% | 0,479% |
| HTSR_1342 | NAD-dependent epimerase/dehydratase                                            | 7  | 13 | 7  | 0,064% | 0,123% | 0,168% |
| HTSR_1343 | transcriptional regulator                                                      | 0  | 0  | 0  | 0,000% | 0,000% | 0,000% |
| HTSR_1344 | chaperone protein TorD                                                         | 3  | 4  | 0  | 0,027% | 0,038% | 0,000% |
| HTSR_1345 | polysulfide reductase NrfD                                                     | 7  | 8  | 2  | 0,064% | 0,076% | 0,048% |
| HTSR_1346 | 4Fe-4S ferredoxin iron-sulfur binding domain protein                           | 11 | 10 | 3  | 0,100% | 0,094% | 0,072% |
| HTSR_1347 | molybdopterin oxidoreductase                                                   | 49 | 63 | 27 | 0,445% | 0,595% | 0,646% |
| HTSR_1348 | rhodanese domain protein                                                       | 26 | 32 | 19 | 0,236% | 0,302% | 0,455% |
| HTSR_1349 | bacterio-opsin activator HTH domain-containing protein                         | 1  | 0  | 2  | 0,009% | 0,000% | 0,048% |
| HTSR_1350 | bacterio-opsin activator HTH domain-containing protein                         | 1  | 0  | 0  | 0,009% | 0,000% | 0,000% |
| HTSR_1351 | anaerobic dehydrogenase subunit                                                | 2  | 0  | 1  | 0,018% | 0,000% | 0,024% |
| HTSR_1352 | hypothetical protein                                                           | 0  | 0  | 0  | 0,000% | 0,000% | 0,000% |
| HTSR_1353 | flagella-related protein E                                                     | 11 | 2  | 6  | 0,100% | 0,019% | 0,144% |
| HTSR_1354 | flagella-related protein F                                                     | 0  | 0  | 0  | 0,000% | 0,000% | 0,000% |
| HTSR_1355 | flagella-related protein G                                                     | 2  | 0  | 6  | 0,018% | 0,000% | 0,144% |
| HTSR_1356 | flagella-related protein H                                                     | 3  | 5  | 12 | 0,027% | 0,047% | 0,287% |
| HTSR_1357 | flagella-related protein I                                                     | 1  | 0  | 3  | 0,009% | 0,000% | 0,072% |
| HTSR_1358 | flagella-related protein J                                                     | 0  | 0  | 0  | 0,000% | 0,000% | 0,000% |
| HTSR_1359 | septum site-determining protein MinD                                           | 0  | 0  | 0  | 0,000% | 0,000% | 0,000% |
| HTSR_1360 | hypothetical protein                                                           | 0  | 0  | 0  | 0,000% | 0,000% | 0,000% |
| HTSR_1361 | hypothetical protein                                                           | 0  | 6  | 3  | 0,000% | 0,057% | 0,072% |
| HTSR_1362 | chemotaxis protein CheW                                                        | 1  | 0  | 2  | 0,009% | 0,000% | 0,048% |
| HTSR_1363 | methyl-accepting chemotaxis sensory transducer                                 | 12 | 14 | 18 | 0,109% | 0,132% | 0,431% |
| HTSR_1364 | metal-dependent hydrolase, beta-lactamase superfamily II                       | 4  | 6  | 5  | 0,036% | 0,057% | 0,120% |
| HTSR_1365 | hypothetical protein                                                           | 11 | 5  | 7  | 0,100% | 0,047% | 0,168% |
| HTSR_1366 | hypothetical protein                                                           | 1  | 0  | 0  | 0,009% | 0,000% | 0,000% |
| HTSR_1367 | chemotaxis protein CheW                                                        | 3  | 6  | 8  | 0,027% | 0,057% | 0,191% |
| HTSR_1368 | chemotaxis protein CheY                                                        | 3  | 0  | 2  | 0,027% | 0,000% | 0,048% |
| HTSR_1369 | chemotaxis-specific methyltransferase CheB                                     | 6  | 7  | 6  | 0,054% | 0,066% | 0,144% |
| HTSR_1370 | chemotaxis protein CheA                                                        | 28 | 24 | 25 | 0,254% | 0,227% | 0,598% |
| HTSR_1371 | chemotaxis protein CheC1                                                       | 3  | 0  | 5  | 0,027% | 0,000% | 0,120% |
| HTSR_1372 | chemotaxis protein CheC2                                                       | 3  | 4  | 4  | 0,027% | 0,038% | 0,096% |
| HTSR_1373 | chemotaxis protein CheD                                                        | 0  | 0  | 2  | 0,000% | 0,000% | 0,048% |
| HTSR_1374 | chemotaxis protein CheR                                                        | 7  | 4  | 9  | 0,064% | 0,038% | 0,215% |
| HTSR_1375 | chemotaxis protein CheF2                                                       | 2  | 1  | 17 | 0,018% | 0,009% | 0,407% |
| HTSR_1376 | chemotaxis protein CheF1                                                       | 0  | 3  | 12 | 0,000% | 0,028% | 0,287% |
| HTSR_1377 | phycocyanin alpha phycocyanobilin lyase                                        | 3  | 2  | 3  | 0,027% | 0,019% | 0,072% |
| HTSR_1378 | flagellin                                                                      | 0  | 0  | 2  | 0,000% | 0,000% | 0,048% |
| HTSR_1379 | hypothetical protein                                                           | 1  | 0  | 1  | 0,009% | 0,000% | 0,024% |
| HTSR_1380 | flagellin                                                                      | 10 | 4  | 12 | 0,091% | 0,038% | 0,287% |
| HTSR_1381 | flagellin                                                                      | 4  | 1  | 9  | 0,036% | 0,009% | 0,215% |
| HTSR_1382 | hypothetical protein                                                           | 0  | 0  | 0  | 0,000% | 0,000% | 0,000% |
| HTSR_1383 | flagella E                                                                     | 6  | 1  | 7  | 0,054% | 0,009% | 0,168% |
| HTSR_1384 | mRNA 3-end processing factor-like protein                                      | 22 | 28 | 33 | 0,200% | 0,265% | 0,790% |
| HTSR_1385 | endonuclease III                                                               | 3  | 3  | 0  | 0,027% | 0,028% | 0,000% |
| HTSR_1386 | hypothetical protein                                                           | 4  | 0  | 2  | 0,036% | 0,000% | 0,048% |
| HTSR_1387 | hypothetical protein                                                           | 0  | 0  | 0  | 0,000% | 0,000% | 0,000% |
| HTSR_1388 | phosphoserine phosphatase                                                      | 42 | 25 | 32 | 0,381% | 0,236% | 0,766% |
| HTSR_1389 | hypothetical protein                                                           | 0  | 6  | 2  | 0,000% | 0,057% | 0,048% |
| HTSR_1390 | ATP binding protein                                                            | 0  | 0  | 3  | 0,000% | 0,000% | 0,072% |
| HTSR_1391 | glucose-1-phosphate thymidyltransferase                                        | 1  | 5  | 5  | 0,009% | 0,047% | 0,120% |
| HTSR_1392 | shikimate dehydrogenase                                                        | 6  | 6  | 5  | 0,054% | 0,057% | 0,120% |
| HTSR_1393 | sodium/calcium exchanger membrane region                                       | 0  | 1  | 3  | 0,000% | 0,009% | 0,072% |
| HTSR_1394 | hypothetical protein                                                           | 0  | 2  | 1  | 0,000% | 0,019% | 0,024% |
| HTSR_1395 | D-aminoacyl-tRNA deacylase                                                     | 14 | 9  | 10 | 0,127% | 0,085% | 0,239% |
| HTSR_1396 | cell division protein FtsZ                                                     | 13 | 3  | 17 | 0,118% | 0,028% | 0,407% |
| HTSR_1397 | preprotein translocase subunit SecE                                            | 1  | 3  | 3  | 0,009% | 0,028% | 0,072% |

|           |                                                                  |    |    |    |        |        |        |
|-----------|------------------------------------------------------------------|----|----|----|--------|--------|--------|
| HTSR_1398 | transcription antitermination protein NusG                       | 9  | 7  | 1  | 0,082% | 0,066% | 0,024% |
| HTSR_1399 | hypothetical protein                                             | 1  | 1  | 2  | 0,009% | 0,009% | 0,048% |
| HTSR_1400 | metal-dependent phosphoesterase (PHP family)-like protein        | 1  | 0  | 9  | 0,009% | 0,000% | 0,215% |
| HTSR_1401 | competence/damage-inducible protein ClnA                         | 2  | 1  | 3  | 0,018% | 0,009% | 0,072% |
| HTSR_1402 | arsenite-transporting ATPase                                     | 8  | 12 | 3  | 0,073% | 0,113% | 0,072% |
| HTSR_1403 | hydroxypyruvate reductase                                        | 8  | 11 | 13 | 0,073% | 0,104% | 0,311% |
| HTSR_1404 | short-chain dehydrogenase/reductase                              | 8  | 16 | 14 | 0,073% | 0,151% | 0,335% |
| HTSR_1405 | deoxyribonuclease V                                              | 0  | 0  | 0  | 0,000% | 0,000% | 0,000% |
| HTSR_1406 | rhomoid family intramembrane serine protease                     | 1  | 1  | 2  | 0,009% | 0,009% | 0,048% |
| HTSR_1407 | hypothetical protein                                             | 4  | 2  | 4  | 0,036% | 0,019% | 0,096% |
| HTSR_1408 | DNA polymerase IV (family X)                                     | 11 | 19 | 19 | 0,100% | 0,179% | 0,455% |
| HTSR_1409 | hypothetical protein                                             | 0  | 0  | 0  | 0,000% | 0,000% | 0,000% |
| HTSR_1410 | hypothetical protein                                             | 2  | 0  | 3  | 0,018% | 0,000% | 0,072% |
| HTSR_1411 | hypothetical protein                                             | 3  | 5  | 5  | 0,027% | 0,047% | 0,120% |
| HTSR_1412 | Abi/CAAX family protein                                          | 1  | 1  | 1  | 0,009% | 0,009% | 0,024% |
| HTSR_1413 | hypothetical protein                                             | 0  | 0  | 18 | 0,000% | 0,000% | 0,431% |
| HTSR_1414 | DNA topoisomerase I                                              | 31 | 24 | 25 | 0,281% | 0,227% | 0,598% |
| HTSR_1415 | hypothetical protein                                             | 0  | 0  | 0  | 0,000% | 0,000% | 0,000% |
| HTSR_1416 | aspartyl-tRNA(Asn)/glutamyl-tRNA(Gln) amidotransferase subunit B | 13 | 20 | 15 | 0,118% | 0,189% | 0,359% |
| HTSR_1417 | hypothetical protein                                             | 0  | 0  | 1  | 0,000% | 0,000% | 0,024% |
| HTSR_1418 | chromosome segregation protein SMC                               | 6  | 0  | 7  | 0,054% | 0,000% | 0,168% |
| HTSR_1419 | chromosome segregation and condensation protein ScpA             | 0  | 0  | 1  | 0,000% | 0,000% | 0,024% |
| HTSR_1420 | 5'-methylthioadenosine phosphorylase                             | 21 | 23 | 17 | 0,191% | 0,217% | 0,407% |
| HTSR_1421 | xanthine phosphoribosyltransferase                               | 7  | 6  | 7  | 0,064% | 0,057% | 0,168% |
| HTSR_1422 | hypothetical protein                                             | 4  | 4  | 4  | 0,036% | 0,038% | 0,096% |
| HTSR_1423 | phosphoenolpyruvate synthase                                     | 34 | 52 | 34 | 0,309% | 0,491% | 0,814% |
| HTSR_1424 | peptidase M48                                                    | 0  | 1  | 1  | 0,000% | 0,009% | 0,000% |
| HTSR_1425 | tyrosine decarboxylase / aspartate 1-decarboxylase               | 4  | 0  | 7  | 0,036% | 0,000% | 0,168% |
| HTSR_1426 | hypothetical protein                                             | 0  | 0  | 1  | 0,000% | 0,000% | 0,024% |
| HTSR_1427 | hypothetical protein                                             | 0  | 3  | 1  | 0,000% | 0,028% | 0,024% |
| HTSR_1428 | methionyl-tRNA synthetase                                        | 35 | 45 | 35 | 0,318% | 0,425% | 0,838% |
| HTSR_1429 | pyruvate kinase                                                  | 16 | 33 | 15 | 0,145% | 0,312% | 0,359% |
| HTSR_1430 | protease                                                         | 2  | 2  | 3  | 0,018% | 0,019% | 0,072% |
| HTSR_1431 | phosphoesterase                                                  | 22 | 48 | 22 | 0,200% | 0,453% | 0,527% |
| HTSR_1432 | MarR family transcriptional regulator                            | 1  | 1  | 0  | 0,009% | 0,009% | 0,000% |
| HTSR_1433 | hypothetical protein                                             | 0  | 0  | 0  | 0,000% | 0,000% | 0,000% |
| HTSR_1434 | dolichol-P-glucose synthetase                                    | 1  | 4  | 6  | 0,009% | 0,038% | 0,144% |
| HTSR_1435 | transcription initiation factor IIB 2                            | 13 | 0  | 20 | 0,118% | 0,000% | 0,479% |
| HTSR_1436 | 3-dehydroquinate dehydratase I                                   | 10 | 8  | 1  | 0,091% | 0,076% | 0,024% |
| HTSR_1437 | hypothetical protein                                             | 2  | 1  | 4  | 0,018% | 0,009% | 0,096% |
| HTSR_1438 | 3-dehydroquinate synthase                                        | 13 | 24 | 21 | 0,118% | 0,227% | 0,503% |
| HTSR_1439 | fructose-bisphosphate aldolase                                   | 10 | 20 | 4  | 0,091% | 0,189% | 0,096% |
| HTSR_1440 | tryptophan synthase alpha chain                                  | 7  | 2  | 4  | 0,064% | 0,019% | 0,096% |
| HTSR_1441 | tryptophan synthase beta chain                                   | 15 | 19 | 12 | 0,136% | 0,179% | 0,287% |
| HTSR_1442 | indole-3-glycerol phosphate synthase                             | 9  | 0  | 5  | 0,082% | 0,000% | 0,120% |
| HTSR_1443 | methylated-DNA-protein-cysteine methyltransferase                | 6  | 8  | 5  | 0,054% | 0,076% | 0,120% |
| HTSR_1444 | abortive infection protein                                       | 1  | 0  | 1  | 0,009% | 0,000% | 0,024% |
| HTSR_1445 | ATP-dependent protease LonB                                      | 14 | 11 | 33 | 0,127% | 0,104% | 0,790% |
| HTSR_1446 | nicotinamide-nucleotide adenyltransferase NadM                   | 1  | 6  | 5  | 0,009% | 0,057% | 0,120% |
| HTSR_1447 | S-adenosylmethionine hydroxide adenosyltransferase               | 4  | 4  | 3  | 0,036% | 0,038% | 0,072% |
| HTSR_1448 | amidohydrolase                                                   | 3  | 7  | 2  | 0,027% | 0,066% | 0,048% |
| HTSR_1449 | glycosyltransferase, type 2                                      | 0  | 0  | 10 | 0,000% | 0,000% | 0,239% |
| HTSR_1450 | S-adenosylmethionine-dependent methyltransferase                 | 5  | 8  | 14 | 0,045% | 0,076% | 0,335% |
| HTSR_1451 | ArsR family transcriptional regulator                            | 1  | 0  | 1  | 0,009% | 0,000% | 0,024% |
| HTSR_1452 | hypothetical protein                                             | 2  | 1  | 0  | 0,018% | 0,009% | 0,000% |
| HTSR_1453 | deoxyribonuclease                                                | 9  | 11 | 6  | 0,082% | 0,104% | 0,144% |
| HTSR_1454 | radical SAM protein                                              | 3  | 1  | 10 | 0,027% | 0,009% | 0,239% |
| HTSR_1455 | hypothetical protein                                             | 0  | 0  | 0  | 0,000% | 0,000% | 0,000% |
| HTSR_1456 | molecular chaperone Hsp20                                        | 5  | 5  | 5  | 0,045% | 0,047% | 0,120% |
| HTSR_1457 | coenzyme A pyrophosphatase / NUDIX hydrolase                     | 0  | 0  | 2  | 0,000% | 0,000% | 0,048% |
| HTSR_1458 | hypothetical protein                                             | 7  | 4  | 4  | 0,064% | 0,038% | 0,096% |
| HTSR_1459 | major facilitator superfamily MFS_1                              | 1  | 1  | 0  | 0,009% | 0,009% | 0,000% |
| HTSR_1460 | hypothetical protein                                             | 0  | 2  | 2  | 0,000% | 0,019% | 0,048% |
| HTSR_1461 | hypothetical protein                                             | 0  | 0  | 0  | 0,000% | 0,000% | 0,000% |
| HTSR_1462 | hypothetical protein                                             | 0  | 0  | 0  | 0,000% | 0,000% | 0,000% |
| HTSR_1463 | hypothetical protein                                             | 0  | 0  | 0  | 0,000% | 0,000% | 0,000% |
| HTSR_1464 | hypothetical protein                                             | 0  | 0  | 0  | 0,000% | 0,000% | 0,000% |
| HTSR_1465 | type II secretion system transmembrane protein                   | 0  | 1  | 0  | 0,000% | 0,009% | 0,000% |
| HTSR_1466 | type II secretion system protein E                               | 0  | 1  | 0  | 0,000% | 0,009% | 0,000% |
| HTSR_1467 | hypothetical protein                                             | 0  | 0  | 0  | 0,000% | 0,000% | 0,000% |
| HTSR_1468 | hypothetical protein                                             | 0  | 0  | 0  | 0,000% | 0,000% | 0,000% |
| HTSR_1469 | type I phosphodiesterase/nucleotide pyrophosphatase              | 22 | 21 | 20 | 0,200% | 0,198% | 0,479% |
| HTSR_1470 | inorganic pyrophosphatase                                        | 12 | 13 | 8  | 0,109% | 0,123% | 0,191% |
| HTSR_1471 | PadR family transcriptional regulator                            | 5  | 2  | 5  | 0,045% | 0,019% | 0,120% |
| HTSR_1472 | hypothetical protein                                             | 3  | 0  | 1  | 0,027% | 0,000% | 0,024% |
| HTSR_1473 | ribonuclease HI                                                  | 5  | 1  | 2  | 0,045% | 0,009% | 0,048% |
| HTSR_1474 | transcription initiation factor TFB                              | 9  | 13 | 33 | 0,082% | 0,123% | 0,790% |
| HTSR_1475 | geranylgeranylglyceryl phosphate synthase                        | 0  | 3  | 1  | 0,000% | 0,028% | 0,024% |
| HTSR_1476 | aspartyl-tRNA synthetase                                         | 19 | 29 | 21 | 0,172% | 0,274% | 0,503% |
| HTSR_1477 | sugar kinase                                                     | 4  | 3  | 5  | 0,036% | 0,028% | 0,120% |
| HTSR_1478 | hypothetical protein / Phosphopantothenate synthetase, archaeal  | 5  | 1  | 5  | 0,045% | 0,009% | 0,120% |
| HTSR_1479 | phosphomethylpyrimidine kinase                                   | 6  | 3  | 6  | 0,054% | 0,028% | 0,144% |
| HTSR_1480 | dCTP deaminase                                                   | 9  | 9  | 12 | 0,082% | 0,085% | 0,287% |
| HTSR_1481 | peptidyl-tRNA hydrolase, PTH2 family                             | 4  | 5  | 5  | 0,036% | 0,047% | 0,120% |
| HTSR_1482 | tRNA pseudouridine synthase D                                    | 3  | 12 | 12 | 0,027% | 0,113% | 0,287% |
| HTSR_1483 | hypothetical protein                                             | 2  | 2  | 3  | 0,018% | 0,019% | 0,072% |
| HTSR_1484 | metal-binding protein                                            | 1  | 2  | 6  | 0,009% | 0,019% | 0,144% |
| HTSR_1485 | 50S ribosomal protein L37Ae                                      | 3  | 3  | 6  | 0,027% | 0,028% | 0,144% |
| HTSR_1486 | DNA-directed RNA polymerase subunit P                            | 1  | 2  | 3  | 0,009% | 0,019% | 0,072% |
| HTSR_1487 | hypothetical protein                                             | 0  | 0  | 1  | 0,000% | 0,000% | 0,024% |
| HTSR_1488 | periplasmic serine proteinase                                    | 7  | 6  | 5  | 0,064% | 0,057% | 0,120% |
| HTSR_1489 | prefoldin subunit beta                                           | 9  | 9  | 4  | 0,082% | 0,085% | 0,096% |
| HTSR_1490 | hypothetical protein                                             | 1  | 1  | 1  | 0,009% | 0,009% | 0,024% |
| HTSR_1491 | membrane protein                                                 | 5  | 1  | 4  | 0,045% | 0,009% | 0,096% |
| HTSR_1492 | GMP synthase (glutamine-hydrolysing)                             | 5  | 3  | 3  | 0,045% | 0,028% | 0,072% |
| HTSR_1493 | hypothetical protein                                             | 0  | 0  | 0  | 0,000% | 0,000% | 0,000% |
| HTSR_1494 | hypothetical protein                                             | 1  | 0  | 7  | 0,009% | 0,000% | 0,168% |
| HTSR_1495 | 2-isopropylmalate synthase                                       | 15 | 9  | 8  | 0,136% | 0,085% | 0,191% |
| HTSR_1496 | succinic semialdehyde dehydrogenase                              | 5  | 18 | 13 | 0,045% | 0,170% | 0,311% |
| HTSR_1498 | secretion system protein                                         | 0  | 0  | 5  | 0,000% | 0,000% | 0,120% |
| HTSR_1499 | membrane protein                                                 | 0  | 0  | 0  | 0,000% | 0,000% | 0,000% |
| HTSR_1500 | hypothetical protein                                             | 0  | 0  | 0  | 0,000% | 0,000% | 0,000% |
| HTSR_1501 | chromosome partitioning protein ParA                             | 0  | 0  | 2  | 0,000% | 0,000% | 0,048% |
| HTSR_1502 | ATP-grasp superfamily enzyme                                     | 2  | 9  | 0  | 0,018% | 0,085% | 0,000% |
| HTSR_1503 | hypothetical protein                                             | 1  | 4  | 3  | 0,009% | 0,038% | 0,072% |

|           |                                                                                                                           |    |    |    |        |        |        |
|-----------|---------------------------------------------------------------------------------------------------------------------------|----|----|----|--------|--------|--------|
| HTSR_1504 | peroxiredoxin, OsmC subfamily                                                                                             | 1  | 1  | 0  | 0,009% | 0,009% | 0,000% |
| HTSR_1506 | CopG family transcriptional regulator                                                                                     | 0  | 0  | 0  | 0,000% | 0,000% | 0,000% |
| HTSR_1507 | cell division protein FtsZ                                                                                                | 17 | 7  | 24 | 0,154% | 0,066% | 0,574% |
| HTSR_1508 | arginosuccinate synthase                                                                                                  | 0  | 3  | 4  | 0,000% | 0,028% | 0,096% |
| HTSR_1509 | peptidase M29 aminopeptidase II                                                                                           | 11 | 24 | 17 | 0,100% | 0,227% | 0,407% |
| HTSR_1510 | SAM-dependent methyltransferase                                                                                           | 0  | 1  | 6  | 0,000% | 0,009% | 0,144% |
| HTSR_1511 | endonuclease IV                                                                                                           | 0  | 0  | 3  | 0,000% | 0,000% | 0,072% |
| HTSR_1512 | serine/threonine protein kinase                                                                                           | 7  | 10 | 19 | 0,064% | 0,094% | 0,455% |
| HTSR_1513 | ATPase                                                                                                                    | 4  | 3  | 14 | 0,036% | 0,028% | 0,335% |
| HTSR_1514 | hypothetical protein                                                                                                      | 0  | 0  | 0  | 0,000% | 0,000% | 0,000% |
| HTSR_1515 | DNA recombination protein RmuC                                                                                            | 3  | 3  | 6  | 0,027% | 0,028% | 0,144% |
| HTSR_1516 | ATP-dependent DNA ligase                                                                                                  | 0  | 4  | 9  | 0,000% | 0,038% | 0,215% |
| HTSR_1517 | hypothetical protein                                                                                                      | 1  | 0  | 8  | 0,009% | 0,000% | 0,191% |
| HTSR_1518 | 50S ribosomal protein L15e                                                                                                | 4  | 3  | 8  | 0,036% | 0,028% | 0,191% |
| HTSR_1519 | respiratory-chain NADH dehydrogenase domain 51 kDa subunit                                                                | 2  | 5  | 0  | 0,018% | 0,047% | 0,000% |
| HTSR_1520 | two-component sensor histidine kinase                                                                                     | 0  | 0  | 2  | 0,000% | 0,000% | 0,048% |
| HTSR_1521 | chaperone protein TorD                                                                                                    | 0  | 0  | 0  | 0,000% | 0,000% | 0,000% |
| HTSR_1522 | molybdopterin oxidoreductase                                                                                              | 0  | 56 | 0  | 0,000% | 0,529% | 0,000% |
| HTSR_1523 | polysulfide reductase NrfD                                                                                                | 0  | 8  | 0  | 0,000% | 0,076% | 0,000% |
| HTSR_1524 | 4Fe-4S ferredoxin iron-sulfur binding domain protein                                                                      | 0  | 6  | 0  | 0,000% | 0,057% | 0,000% |
| HTSR_1525 | bacterio-opsin activator HTH domain-containing protein                                                                    | 1  | 2  | 4  | 0,009% | 0,019% | 0,096% |
| HTSR_1526 | proteasome beta subunit                                                                                                   | 7  | 8  | 16 | 0,064% | 0,076% | 0,383% |
| HTSR_1527 | proteasome alpha subunit                                                                                                  | 24 | 31 | 27 | 0,218% | 0,293% | 0,646% |
| HTSR_1528 | translation elongation factor aEF-2                                                                                       | 56 | 96 | 67 | 0,508% | 0,907% | 1,264% |
| HTSR_1529 | 30S ribosomal protein S7                                                                                                  | 22 | 16 | 21 | 0,200% | 0,151% | 0,503% |
| HTSR_1530 | 30S ribosomal protein S12                                                                                                 | 7  | 8  | 13 | 0,064% | 0,076% | 0,311% |
| HTSR_1531 | transcription elongation factor NusA                                                                                      | 0  | 0  | 0  | 0,000% | 0,000% | 0,000% |
| HTSR_1532 | DNA-directed RNA polymerase subunit A"                                                                                    | 26 | 32 | 28 | 0,236% | 0,302% | 0,670% |
| HTSR_1533 | DNA-directed RNA polymerase subunit A'                                                                                    | 45 | 65 | 53 | 0,408% | 0,614% | 1,269% |
| HTSR_1534 | DNA-directed RNA polymerase subunit B'                                                                                    | 19 | 37 | 35 | 0,172% | 0,350% | 0,838% |
| HTSR_1535 | DNA-directed RNA polymerase subunit B"                                                                                    | 31 | 54 | 56 | 0,281% | 0,510% | 1,340% |
| HTSR_1536 | DNA-directed RNA polymerase subunit H                                                                                     | 2  | 1  | 1  | 0,018% | 0,009% | 0,024% |
| HTSR_1538 | TetR family transcriptional regulator                                                                                     | 6  | 12 | 18 | 0,054% | 0,113% | 0,431% |
| HTSR_1539 | exo-alpha-sialidase                                                                                                       | 17 | 29 | 20 | 0,154% | 0,274% | 0,479% |
| HTSR_1540 | RND transporter                                                                                                           | 3  | 8  | 1  | 0,027% | 0,076% | 0,024% |
| HTSR_1541 | hypothetical protein                                                                                                      | 0  | 0  | 0  | 0,000% | 0,000% | 0,000% |
| HTSR_1542 | hypothetical protein                                                                                                      | 14 | 21 | 10 | 0,127% | 0,198% | 0,239% |
| HTSR_1543 | transcriptional regulator                                                                                                 | 5  | 3  | 4  | 0,045% | 0,028% | 0,096% |
| HTSR_1544 | hypothetical protein                                                                                                      | 0  | 2  | 0  | 0,000% | 0,019% | 0,000% |
| HTSR_1545 | bacterio-opsin activator HTH domain-containing protein                                                                    | 0  | 2  | 2  | 0,000% | 0,019% | 0,048% |
| HTSR_1546 | bacterio-opsin activator HTH domain-containing protein                                                                    | 0  | 0  | 0  | 0,000% | 0,000% | 0,000% |
| HTSR_1547 | bacterio-opsin activator HTH domain-containing protein                                                                    | 0  | 0  | 0  | 0,000% | 0,000% | 0,000% |
| HTSR_1548 | hypothetical protein                                                                                                      | 0  | 0  | 6  | 0,000% | 0,000% | 0,144% |
| HTSR_1549 | binding-protein-dependent transport system innermembrane protein                                                          | 0  | 0  | 0  | 0,000% | 0,000% | 0,000% |
| HTSR_1550 | O-methyltransferase family 3                                                                                              | 0  | 0  | 0  | 0,000% | 0,000% | 0,000% |
| HTSR_1551 | ABC transporter substrate-binding protein                                                                                 | 0  | 0  | 5  | 0,000% | 0,000% | 0,120% |
| HTSR_1552 | ABC transporter ATP-binding protein                                                                                       | 0  | 0  | 0  | 0,000% | 0,000% | 0,000% |
| HTSR_1553 | binding-protein-dependent transport system innermembrane protein                                                          | 0  | 0  | 0  | 0,000% | 0,000% | 0,000% |
| HTSR_1554 | carbon monoxide dehydrogenase subunit G-like protein                                                                      | 0  | 0  | 0  | 0,000% | 0,000% | 0,000% |
| HTSR_1555 | hypothetical protein                                                                                                      | 8  | 11 | 1  | 0,073% | 0,104% | 0,024% |
| HTSR_1556 | 4Fe-4S ferredoxin                                                                                                         | 0  | 0  | 0  | 0,000% | 0,000% | 0,000% |
| HTSR_1557 | polysulfide reductase NrfD                                                                                                | 1  | 1  | 0  | 0,009% | 0,009% | 0,000% |
| HTSR_1558 | (2Fe-2S)-binding protein                                                                                                  | 1  | 0  | 0  | 0,009% | 0,000% | 0,000% |
| HTSR_1559 | response regulator receiver protein                                                                                       | 12 | 3  | 2  | 0,109% | 0,028% | 0,048% |
| HTSR_1560 | ACT domain-containing protein                                                                                             | 7  | 5  | 7  | 0,064% | 0,047% | 0,168% |
| HTSR_1561 | Homoserine dehydrogenase                                                                                                  | 8  | 12 | 11 | 0,073% | 0,113% | 0,263% |
| HTSR_1562 | elongation factor 1-alpha                                                                                                 | 46 | 61 | 52 | 0,417% | 0,576% | 1,245% |
| HTSR_1563 | 30S ribosomal protein S10                                                                                                 | 6  | 5  | 8  | 0,054% | 0,047% | 0,191% |
| HTSR_1565 | hypothetical protein                                                                                                      | 0  | 0  | 4  | 0,000% | 0,000% | 0,096% |
| HTSR_1566 | integrase                                                                                                                 | 0  | 0  | 0  | 0,000% | 0,000% | 0,000% |
| HTSR_1567 | ArsR family transcriptional regulator / Rhodanese domain protein                                                          | 4  | 3  | 2  | 0,036% | 0,028% | 0,048% |
| HTSR_1568 | hypothetical protein                                                                                                      | 4  | 5  | 2  | 0,036% | 0,047% | 0,048% |
| HTSR_1569 | signal transduction protein                                                                                               | 13 | 29 | 24 | 0,118% | 0,274% | 0,574% |
| HTSR_1570 | hypothetical protein                                                                                                      | 0  | 0  | 0  | 0,000% | 0,000% | 0,000% |
| HTSR_1571 | iron-sulfur binding protein, ferredoxin-like protein                                                                      | 4  | 11 | 3  | 0,036% | 0,104% | 0,072% |
| HTSR_1572 | molecular chaperone TorD                                                                                                  | 10 | 6  | 0  | 0,091% | 0,057% | 0,000% |
| HTSR_1573 | cytochrome b subunit of formate dehydrogenase                                                                             | 2  | 0  | 0  | 0,018% | 0,000% | 0,000% |
| HTSR_1574 | hypothetical protein                                                                                                      | 0  | 0  | 0  | 0,000% | 0,000% | 0,000% |
| HTSR_1575 | formate dehydrogenase                                                                                                     | 1  | 0  | 0  | 0,009% | 0,000% | 0,000% |
| HTSR_1576 | anaerobic dehydrogenase subunit alpha                                                                                     | 23 | 12 | 4  | 0,209% | 0,113% | 0,096% |
| HTSR_1577 | hypothetical protein                                                                                                      | 3  | 13 | 9  | 0,027% | 0,123% | 0,215% |
| HTSR_1578 | deoxyuridine 5'-triphosphate nucleotidohydrolase                                                                          | 0  | 0  | 0  | 0,000% | 0,000% | 0,000% |
| HTSR_1579 | ribosomal-protein-alanine N-acetyltransferase                                                                             | 0  | 0  | 2  | 0,000% | 0,000% | 0,048% |
| HTSR_1580 | hypothetical protein                                                                                                      | 2  | 4  | 2  | 0,018% | 0,038% | 0,048% |
| HTSR_1581 | ADP-ribose pyrophosphatase                                                                                                | 1  | 2  | 0  | 0,009% | 0,019% | 0,000% |
| HTSR_1582 | hypothetical protein                                                                                                      | 0  | 0  | 0  | 0,000% | 0,000% | 0,000% |
| HTSR_1583 | 1,4-dihydroxy-2-naphthoate octaprenyltransferase / Menaquinone via futasolone polypropenyltransferase (MenA homolog), Nit | 2  | 4  | 4  | 0,018% | 0,038% | 0,096% |
| HTSR_1584 | ribonuclease R                                                                                                            | 20 | 30 | 14 | 0,181% | 0,283% | 0,335% |
| HTSR_1585 | RNA-binding protein                                                                                                       | 2  | 4  | 1  | 0,018% | 0,038% | 0,024% |
| HTSR_1586 | hypothetical protein                                                                                                      | 12 | 14 | 6  | 0,109% | 0,132% | 0,144% |
| HTSR_1587 | hypothetical protein                                                                                                      | 3  | 2  | 2  | 0,027% | 0,019% | 0,048% |
| HTSR_1588 | hypothetical protein                                                                                                      | 2  | 2  | 6  | 0,018% | 0,019% | 0,144% |
| HTSR_1589 | hypothetical protein                                                                                                      | 0  | 0  | 0  | 0,000% | 0,000% | 0,000% |
| HTSR_1590 | geranylgeranyl reductase                                                                                                  | 0  | 0  | 2  | 0,000% | 0,000% | 0,048% |
| HTSR_1591 | metallophosphoesterase                                                                                                    | 0  | 2  | 1  | 0,000% | 0,019% | 0,024% |
| HTSR_1592 | ATP dependent DNA ligase                                                                                                  | 4  | 18 | 11 | 0,036% | 0,170% | 0,263% |
| HTSR_1593 | hypothetical protein                                                                                                      | 10 | 15 | 5  | 0,091% | 0,142% | 0,120% |
| HTSR_1594 | excinuclease ABC subunit A                                                                                                | 2  | 1  | 21 | 0,018% | 0,009% | 0,503% |
| HTSR_1595 | aminomethyltransferase                                                                                                    | 22 | 16 | 16 | 0,200% | 0,151% | 0,383% |
| HTSR_1596 | multidrug DMT transporter permease                                                                                        | 0  | 1  | 1  | 0,000% | 0,009% | 0,024% |
| HTSR_1597 | nitrogen-fixing protein NifU                                                                                              | 0  | 0  | 0  | 0,000% | 0,000% | 0,000% |
| HTSR_1598 | RNA-binding protein                                                                                                       | 4  | 0  | 6  | 0,036% | 0,000% | 0,144% |
| HTSR_1599 | protease PrsW                                                                                                             | 0  | 2  | 0  | 0,000% | 0,019% | 0,000% |
| HTSR_1600 | riboflavin synthase subunit alpha                                                                                         | 0  | 1  | 3  | 0,000% | 0,009% | 0,072% |
| HTSR_1601 | UvrD/REP helicase                                                                                                         | 9  | 0  | 27 | 0,082% | 0,000% | 0,646% |
| HTSR_1602 | small CPxCG-related zinc finger protein                                                                                   | 0  | 0  | 0  | 0,000% | 0,000% | 0,000% |
| HTSR_1603 | ATPase                                                                                                                    | 24 | 23 | 13 | 0,218% | 0,217% | 0,311% |
| HTSR_1604 | ATPase                                                                                                                    | 8  | 7  | 4  | 0,073% | 0,066% | 0,096% |
| HTSR_1605 | ArsR family transcriptional regulator                                                                                     | 1  | 0  | 0  | 0,009% | 0,000% | 0,000% |
| HTSR_1606 | hypothetical protein                                                                                                      | 1  | 1  | 1  | 0,009% | 0,009% | 0,024% |
| HTSR_1607 | ATPase RIL                                                                                                                | 11 | 20 | 15 | 0,100% | 0,189% | 0,359% |
| HTSR_1608 | acetate/CoA ligase                                                                                                        | 46 | 48 | 65 | 0,417% | 0,453% | 1,556% |
| HTSR_1609 | peptidase M54                                                                                                             | 1  | 0  | 8  | 0,009% | 0,000% | 0,191% |
| HTSR_1610 | hypothetical protein                                                                                                      | 0  | 0  | 1  | 0,000% | 0,000% | 0,024% |
| HTSR_1611 | HAD family hydrolase                                                                                                      | 2  | 5  | 7  | 0,018% | 0,047% | 0,168% |

|           |                                                                                        |    |    |    |        |        |        |
|-----------|----------------------------------------------------------------------------------------|----|----|----|--------|--------|--------|
| HTSR_1612 | NADPH-dependent F420 reductase                                                         | 3  | 4  | 0  | 0,027% | 0,038% | 0,000% |
| HTSR_1613 | thioredoxin                                                                            | 4  | 6  | 7  | 0,036% | 0,057% | 0,168% |
| HTSR_1614 | preprotein translocase subunit SecG                                                    | 0  | 1  | 1  | 0,000% | 0,009% | 0,024% |
| HTSR_1615 | hypothetical protein                                                                   | 7  | 8  | 7  | 0,064% | 0,076% | 0,168% |
| HTSR_1616 | phosphoribosyl-ATP pyrophosphohydrolase                                                | 2  | 0  | 2  | 0,018% | 0,000% | 0,048% |
| HTSR_1617 | GTP-binding protein                                                                    | 11 | 4  | 5  | 0,100% | 0,038% | 0,120% |
| HTSR_1618 | hypothetical protein                                                                   | 2  | 3  | 4  | 0,018% | 0,028% | 0,096% |
| HTSR_1619 | GTP-binding protein                                                                    | 1  | 2  | 8  | 0,009% | 0,019% | 0,191% |
| HTSR_1620 | initiation factor 2B related protein                                                   | 1  | 11 | 4  | 0,009% | 0,104% | 0,096% |
| HTSR_1621 | coenzyme F420-0:L-glutamate ligase                                                     | 0  | 0  | 4  | 0,000% | 0,000% | 0,096% |
| HTSR_1622 | translation initiation factor Sui1                                                     | 5  | 2  | 5  | 0,045% | 0,019% | 0,120% |
| HTSR_1623 | ArsR family transcriptional regulator                                                  | 0  | 0  | 0  | 0,000% | 0,000% | 0,000% |
| HTSR_1624 | redox-active disulfide protein 2                                                       | 0  | 0  | 0  | 0,000% | 0,000% | 0,000% |
| HTSR_1625 | cysteine synthase A                                                                    | 3  | 0  | 6  | 0,027% | 0,000% | 0,144% |
| HTSR_1627 | hypothetical protein                                                                   | 0  | 0  | 2  | 0,000% | 0,000% | 0,048% |
| HTSR_1628 | hypothetical protein                                                                   | 0  | 0  | 0  | 0,000% | 0,000% | 0,000% |
| HTSR_1629 | cob(I)alamin adenosyltransferase                                                       | 1  | 0  | 3  | 0,009% | 0,000% | 0,072% |
| HTSR_1630 | 6-phosphogluconate dehydrogenase                                                       | 9  | 17 | 17 | 0,082% | 0,161% | 0,407% |
| HTSR_1631 | valyl-tRNA synthetase                                                                  | 28 | 50 | 32 | 0,254% | 0,472% | 0,766% |
| HTSR_1632 | multidrug DMT transporter permease                                                     | 0  | 0  | 0  | 0,000% | 0,000% | 0,000% |
| HTSR_1633 | sulfate ABC transporter substrate-binding protein                                      | 6  | 17 | 5  | 0,054% | 0,161% | 0,120% |
| HTSR_1634 | sulfate ABC transporter permease                                                       | 0  | 0  | 0  | 0,000% | 0,000% | 0,000% |
| HTSR_1635 | ABC transporter ATP-binding protein                                                    | 0  | 0  | 0  | 0,000% | 0,000% | 0,000% |
| HTSR_1636 | nicotinate phosphoribosyltransferase                                                   | 14 | 25 | 11 | 0,127% | 0,236% | 0,263% |
| HTSR_1637 | major facilitator superfamily MFS_1                                                    | 2  | 0  | 1  | 0,018% | 0,000% | 0,024% |
| HTSR_1638 | hypothetical protein                                                                   | 2  | 5  | 1  | 0,018% | 0,047% | 0,024% |
| HTSR_1639 | hypothetical protein                                                                   | 0  | 0  | 1  | 0,000% | 0,000% | 0,024% |
| HTSR_1640 | hypothetical protein                                                                   | 0  | 0  | 1  | 0,000% | 0,000% | 0,024% |
| HTSR_1641 | dihydroorotase                                                                         | 4  | 16 | 13 | 0,036% | 0,151% | 0,311% |
| HTSR_1642 | hypothetical protein                                                                   | 2  | 1  | 2  | 0,018% | 0,009% | 0,048% |
| HTSR_1643 | universal stress protein UspA                                                          | 3  | 6  | 6  | 0,027% | 0,057% | 0,144% |
| HTSR_1644 | GCN5 family acetyltransferase                                                          | 5  | 1  | 1  | 0,045% | 0,009% | 0,024% |
| HTSR_1645 | recombinase RecJ                                                                       | 8  | 13 | 11 | 0,073% | 0,123% | 0,263% |
| HTSR_1646 | hypothetical protein                                                                   | 3  | 5  | 1  | 0,027% | 0,047% | 0,024% |
| HTSR_1647 | FAD-dependent pyridine nucleotide-disulfide oxidoreductase                             | 2  | 15 | 1  | 0,018% | 0,142% | 0,024% |
| HTSR_1648 | hypothetical protein                                                                   | 0  | 0  | 1  | 0,000% | 0,000% | 0,024% |
| HTSR_1649 | 30S ribosomal protein S6e                                                              | 10 | 4  | 1  | 0,091% | 0,038% | 0,024% |
| HTSR_1650 | peptide-methionine (S)-S-oxide reductase                                               | 4  | 3  | 2  | 0,036% | 0,028% | 0,048% |
| HTSR_1651 | hypothetical protein                                                                   | 0  | 0  | 0  | 0,000% | 0,000% | 0,000% |
| HTSR_1652 | MBL fold metallo-hydrolase                                                             | 0  | 0  | 0  | 0,000% | 0,000% | 0,000% |
| HTSR_1654 | filamentation induced by cAMP protein Fic                                              | 3  | 3  | 4  | 0,027% | 0,028% | 0,096% |
| HTSR_1655 | PAS domain-containing sensor histidine kinase                                          | 7  | 11 | 6  | 0,064% | 0,104% | 0,144% |
| HTSR_1656 | hypothetical protein                                                                   | 0  | 0  | 0  | 0,000% | 0,000% | 0,000% |
| HTSR_1657 | anaerobic dehydrogenase subunit                                                        | 13 | 10 | 8  | 0,118% | 0,094% | 0,191% |
| HTSR_1658 | cytochrome b subunit of formate dehydrogenase                                          | 1  | 4  | 1  | 0,009% | 0,038% | 0,024% |
| HTSR_1659 | hypothetical protein                                                                   | 0  | 3  | 1  | 0,000% | 0,028% | 0,024% |
| HTSR_1660 | 4Fe-4S ferredoxin iron-sulfur binding domain-containing protein                        | 2  | 9  | 6  | 0,018% | 0,085% | 0,144% |
| HTSR_1661 | molybdopterin oxidoreductase                                                           | 16 | 28 | 39 | 0,145% | 0,265% | 0,933% |
| HTSR_1662 | 4Fe-4S ferredoxin                                                                      | 0  | 0  | 0  | 0,000% | 0,000% | 0,000% |
| HTSR_1663 | bacterio-opsin activator HTH domain-containing protein                                 | 0  | 0  | 2  | 0,000% | 0,000% | 0,048% |
| HTSR_1664 | molybdenum cofactor guanylyltransferase                                                | 2  | 0  | 1  | 0,018% | 0,000% | 0,024% |
| HTSR_1665 | dinitrogenase iron-molybdenum cofactor biosynthesis protein                            | 4  | 2  | 3  | 0,036% | 0,019% | 0,072% |
| HTSR_1666 | metal-sulfur cluster biosynthetic enzyme                                               | 0  | 0  | 0  | 0,000% | 0,000% | 0,000% |
| HTSR_1667 | hypothetical protein                                                                   | 1  | 3  | 0  | 0,009% | 0,028% | 0,000% |
| HTSR_1668 | 2-amino-3-ketobutyrate coenzyme A ligase                                               | 25 | 58 | 27 | 0,227% | 0,548% | 0,646% |
| HTSR_1669 | toxin                                                                                  | 0  | 1  | 1  | 0,000% | 0,009% | 0,024% |
| HTSR_1670 | CopG family transcriptional regulator                                                  | 1  | 0  | 0  | 0,009% | 0,000% | 0,000% |
| HTSR_1671 | L-threonine 3-dehydrogenase                                                            | 11 | 20 | 8  | 0,100% | 0,189% | 0,191% |
| HTSR_1672 | aconitase hydratase                                                                    | 32 | 26 | 38 | 0,290% | 0,246% | 0,910% |
| HTSR_1673 | aminoglycoside N3-acetyltransferase                                                    | 0  | 2  | 5  | 0,000% | 0,019% | 0,120% |
| HTSR_1674 | Fe3+-siderophore ABC transporter permease                                              | 0  | 1  | 0  | 0,000% | 0,009% | 0,000% |
| HTSR_1675 | cobalamin/Fe3+-siderophore ABC transporter ATPase                                      | 0  | 0  | 0  | 0,000% | 0,000% | 0,000% |
| HTSR_1676 | trimethylamine methyltransferase                                                       | 5  | 0  | 8  | 0,045% | 0,000% | 0,191% |
| HTSR_1677 | hypothetical protein                                                                   | 0  | 0  | 0  | 0,000% | 0,000% | 0,000% |
| HTSR_1678 | cobalamin biosynthesis protein CobT                                                    | 2  | 2  | 13 | 0,018% | 0,019% | 0,311% |
| HTSR_1679 | AAA domain (dynein-related subfamily) / Nitric oxide reductase activation protein NorQ | 6  | 0  | 20 | 0,054% | 0,000% | 0,479% |
| HTSR_1680 | lipoate-protein ligase A                                                               | 4  | 8  | 14 | 0,036% | 0,076% | 0,335% |
| HTSR_1681 | hypothetical protein                                                                   | 0  | 0  | 0  | 0,000% | 0,000% | 0,000% |
| HTSR_1682 | CopG family transcriptional regulator                                                  | 1  | 1  | 1  | 0,009% | 0,009% | 0,024% |
| HTSR_1683 | DsrE family protein                                                                    | 0  | 1  | 0  | 0,000% | 0,009% | 0,000% |
| HTSR_1684 | 3-oxoacyl-[acyl-carrier protein] reductase                                             | 6  | 0  | 15 | 0,054% | 0,000% | 0,359% |
| HTSR_1685 | PAS sensor histidine kinase                                                            | 1  | 20 | 17 | 0,009% | 0,189% | 0,407% |
| HTSR_1686 | hypothetical protein                                                                   | 0  | 0  | 0  | 0,000% | 0,000% | 0,000% |
| HTSR_1687 | O-acetylhomoserine (thiol)-lyase                                                       | 19 | 19 | 23 | 0,172% | 0,179% | 0,551% |
| HTSR_1688 | hypothetical protein                                                                   | 1  | 3  | 2  | 0,009% | 0,028% | 0,048% |
| HTSR_1689 | cell surface glycoprotein related protein                                              | 0  | 0  | 0  | 0,000% | 0,000% | 0,000% |
| HTSR_1690 | integrase/recombinase                                                                  | 0  | 0  | 0  | 0,000% | 0,000% | 0,000% |
| HTSR_1691 | cell surface glycoprotein                                                              | 0  | 0  | 0  | 0,000% | 0,000% | 0,000% |
| HTSR_1692 | hypothetical protein                                                                   | 1  | 0  | 2  | 0,009% | 0,000% | 0,048% |
| HTSR_1693 | hypothetical protein                                                                   | 11 | 8  | 6  | 0,100% | 0,076% | 0,144% |
| HTSR_1694 | iron-dependent repressor                                                               | 10 | 0  | 2  | 0,091% | 0,000% | 0,048% |
| HTSR_1695 | hypothetical protein                                                                   | 7  | 1  | 0  | 0,064% | 0,009% | 0,000% |
| HTSR_1696 | TrmB family transcriptional regulator                                                  | 5  | 0  | 2  | 0,045% | 0,000% | 0,048% |
| HTSR_1697 | polysulfide reductase NrfD                                                             | 3  | 0  | 0  | 0,027% | 0,000% | 0,000% |
| HTSR_1698 | 4Fe-4S ferredoxin iron-sulfur binding domain-containing protein                        | 0  | 0  | 0  | 0,000% | 0,000% | 0,000% |
| HTSR_1699 | molybdopterin oxidoreductase                                                           | 13 | 6  | 5  | 0,118% | 0,057% | 0,120% |
| HTSR_1700 | 4Fe-4S ferredoxin iron-sulfur binding domain protein                                   | 0  | 0  | 0  | 0,000% | 0,000% | 0,000% |
| HTSR_1701 | IclR family transcriptional regulator                                                  | 0  | 0  | 0  | 0,000% | 0,000% | 0,000% |
| HTSR_1702 | hypothetical protein                                                                   | 1  | 0  | 2  | 0,009% | 0,000% | 0,048% |
| HTSR_1703 | hypothetical protein                                                                   | 1  | 0  | 0  | 0,009% | 0,000% | 0,000% |
| HTSR_1704 | tRNA-Thr(GGU) m(6)t(6)A37 methyltransferase TsaA                                       | 2  | 1  | 0  | 0,018% | 0,009% | 0,000% |
| HTSR_1705 | ferredoxin                                                                             | 10 | 21 | 4  | 0,091% | 0,198% | 0,096% |
| HTSR_1706 | uroporphyrinogen-III decarboxylase                                                     | 12 | 28 | 5  | 0,109% | 0,265% | 0,120% |
| HTSR_1707 | hypothetical protein                                                                   | 0  | 0  | 0  | 0,000% | 0,000% | 0,000% |
| HTSR_1708 | Na <sup>+</sup> /proline symporter                                                     | 0  | 2  | 0  | 0,000% | 0,019% | 0,000% |
| HTSR_1709 | major facilitator superfamily MFS_1                                                    | 0  | 0  | 0  | 0,000% | 0,000% | 0,000% |
| HTSR_1710 | 5-methyltetrahydrofolate-homocysteine methyltransferase                                | 11 | 25 | 2  | 0,100% | 0,236% | 0,048% |
| HTSR_1711 | B12 binding domain/Pterin binding enzyme                                               | 13 | 13 | 6  | 0,118% | 0,123% | 0,144% |
| HTSR_1712 | uroporphyrinogen-III decarboxylase                                                     | 5  | 21 | 6  | 0,045% | 0,198% | 0,144% |
| HTSR_1713 | oxalate/formate antiporter family transporter                                          | 0  | 0  | 0  | 0,000% | 0,000% | 0,000% |
| HTSR_1714 | hypothetical protein                                                                   | 0  | 1  | 1  | 0,000% | 0,009% | 0,024% |
| HTSR_1715 | IclR family transcriptional regulator                                                  | 8  | 11 | 19 | 0,073% | 0,104% | 0,455% |
| HTSR_1716 | chromosome segregation protein SMC                                                     | 24 | 34 | 16 | 0,218% | 0,321% | 0,383% |
| HTSR_1717 | hypothetical protein                                                                   | 2  | 3  | 2  | 0,018% | 0,028% | 0,048% |
| HTSR_1718 | hypothetical protein                                                                   | 0  | 0  | 0  | 0,000% | 0,000% | 0,000% |



|           |                                                                              |    |     |     |        |        |        |
|-----------|------------------------------------------------------------------------------|----|-----|-----|--------|--------|--------|
| HTSR_1719 | amidohydrolase                                                               | 24 | 29  | 14  | 0,218% | 0,274% | 0,335% |
| HTSR_1720 | ATP-grasp domain-containing protein                                          | 12 | 20  | 2   | 0,109% | 0,189% | 0,048% |
| HTSR_1721 | phosphoribosyltransferase                                                    | 6  | 8   | 5   | 0,054% | 0,076% | 0,120% |
| HTSR_1722 | hypothetical protein                                                         | 0  | 8   | 0   | 0,000% | 0,076% | 0,000% |
| HTSR_1723 | radical SAM protein                                                          | 0  | 0   | 0   | 0,000% | 0,000% | 0,000% |
| HTSR_1724 | ATP-dependent DNA helicase PcrA                                              | 0  | 0   | 8   | 0,000% | 0,000% | 0,191% |
| HTSR_1725 | hypothetical protein                                                         | 0  | 0   | 1   | 0,000% | 0,000% | 0,024% |
| HTSR_1726 | helicase                                                                     | 0  | 7   | 4   | 0,000% | 0,066% | 0,096% |
| HTSR_1727 | hypothetical protein                                                         | 0  | 0   | 0   | 0,000% | 0,000% | 0,000% |
| HTSR_1728 | hypothetical protein                                                         | 0  | 0   | 2   | 0,000% | 0,000% | 0,048% |
| HTSR_1729 | hypothetical protein                                                         | 0  | 0   | 0   | 0,000% | 0,000% | 0,000% |
| HTSR_1730 | hypothetical protein                                                         | 0  | 0   | 0   | 0,000% | 0,000% | 0,000% |
| HTSR_1731 | hypothetical protein                                                         | 1  | 0   | 4   | 0,009% | 0,000% | 0,096% |
| HTSR_1732 | hypothetical protein                                                         | 12 | 25  | 47  | 0,109% | 0,236% | 1,125% |
| HTSR_1733 | hypothetical protein                                                         | 0  | 0   | 7   | 0,000% | 0,000% | 0,168% |
| HTSR_1734 | Predicted ATPase (AAA+ superfamily)                                          | 11 | 28  | 36  | 0,100% | 0,265% | 0,862% |
| HTSR_1736 | formate dehydrogenase subunit alpha                                          | 39 | 66  | 34  | 0,354% | 0,624% | 0,814% |
| HTSR_1737 | hypothetical protein                                                         | 5  | 5   | 5   | 0,045% | 0,047% | 0,120% |
| HTSR_1738 | trimethylamine:corrinoid methyltransferase                                   | 49 | 82  | 39  | 0,445% | 0,775% | 0,933% |
| HTSR_1739 | formate-tetrahydrofolate ligase                                              | 64 | 107 | 61  | 0,581% | 1,011% | 1,460% |
| HTSR_1740 | formate dehydrogenase subunit alpha                                          | 47 | 65  | 38  | 0,426% | 0,614% | 0,910% |
| HTSR_1741 | hypothetical protein                                                         | 0  | 1   | 3   | 0,000% | 0,009% | 0,072% |
| HTSR_1742 | anaerobic dehydrogenase                                                      | 5  | 5   | 1   | 0,045% | 0,047% | 0,024% |
| HTSR_1743 | succinylglutamate desuccinylase/aspartoacylase                               | 6  | 8   | 14  | 0,054% | 0,076% | 0,335% |
| HTSR_1744 | ferredoxin                                                                   | 20 | 31  | 25  | 0,181% | 0,293% | 0,598% |
| HTSR_1745 | tetrahydromethanopterin S-methyltransferase subunit H                        | 23 | 37  | 26  | 0,209% | 0,350% | 0,622% |
| HTSR_1746 | 5,10-methylenetetrahydrofolate reductase                                     | 11 | 17  | 10  | 0,100% | 0,161% | 0,239% |
| HTSR_1747 | methylenetetrahydrofolate dehydrogenase (NADP+)                              | 45 | 46  | 27  | 0,408% | 0,435% | 0,646% |
| HTSR_1748 | electron transfer flavoprotein subunit alpha                                 | 29 | 37  | 23  | 0,263% | 0,350% | 0,551% |
| HTSR_1749 | electron transfer flavoprotein subunit beta                                  | 25 | 17  | 12  | 0,227% | 0,161% | 0,287% |
| HTSR_1750 | glycine cleavage system protein T                                            | 95 | 192 | 103 | 0,862% | 1,814% | 2,465% |
| HTSR_1751 | aldehyde ferredoxin oxidoreductase                                           | 4  | 0   | 11  | 0,036% | 0,000% | 0,263% |
| HTSR_1752 | corrinoid methyltransferase                                                  | 29 | 23  | 23  | 0,263% | 0,217% | 0,551% |
| HTSR_1753 | choline/carnitine/betaine transporter                                        | 5  | 6   | 4   | 0,045% | 0,057% | 0,096% |
| HTSR_1754 | dihydrotereoate synthase                                                     | 27 | 34  | 44  | 0,245% | 0,321% | 1,053% |
| HTSR_1755 | competence/damage-inducible protein CinA                                     | 9  | 8   | 4   | 0,082% | 0,076% | 0,096% |
| HTSR_1756 | hypothetical protein                                                         | 17 | 9   | 2   | 0,154% | 0,085% | 0,048% |
| HTSR_1757 | hypothetical protein                                                         | 3  | 9   | 0   | 0,027% | 0,085% | 0,000% |
| HTSR_1758 | cobalamin ABC transporter substrate-binding protein                          | 16 | 10  | 2   | 0,145% | 0,094% | 0,048% |
| HTSR_1759 | cobalamin biosynthesis protein CbiB                                          | 6  | 5   | 0   | 0,054% | 0,047% | 0,000% |
| HTSR_1760 | cobalamin 5'-phosphate synthase                                              | 2  | 2   | 1   | 0,018% | 0,019% | 0,024% |
| HTSR_1761 | adenosylcobinamide-phosphate guanylyltransferase                             | 1  | 1   | 0   | 0,009% | 0,009% | 0,000% |
| HTSR_1762 | threonine-phosphate decarboxylase                                            | 7  | 9   | 7   | 0,064% | 0,085% | 0,168% |
| HTSR_1763 | adenosylcobinamide hydrolase                                                 | 3  | 2   | 0   | 0,027% | 0,019% | 0,000% |
| HTSR_1764 | adenosylcobyrinic acid synthase                                              | 4  | 11  | 2   | 0,036% | 0,104% | 0,048% |
| HTSR_1765 | diphosphomevalonate decarboxylase                                            | 3  | 6   | 10  | 0,027% | 0,057% | 0,239% |
| HTSR_1766 | NADH-binding protein                                                         | 12 | 24  | 14  | 0,109% | 0,227% | 0,335% |
| HTSR_1767 | hypothetical protein                                                         | 0  | 0   | 0   | 0,000% | 0,000% | 0,000% |
| HTSR_1768 | hypothetical protein                                                         | 1  | 0   | 1   | 0,009% | 0,000% | 0,024% |
| HTSR_1769 | multidrug ABC transporter ATP-binding protein                                | 1  | 5   | 4   | 0,009% | 0,047% | 0,096% |
| HTSR_1770 | creatinine amidohydrolase                                                    | 6  | 6   | 6   | 0,054% | 0,057% | 0,144% |
| HTSR_1771 | histidine kinase                                                             | 0  | 0   | 0   | 0,000% | 0,000% | 0,000% |
| HTSR_1772 | hypothetical protein                                                         | 1  | 2   | 1   | 0,009% | 0,019% | 0,024% |
| HTSR_1773 | NAD-dependent epimerase/dehydratase                                          | 2  | 13  | 14  | 0,018% | 0,123% | 0,335% |
| HTSR_1774 | chlorite dismutase                                                           | 8  | 8   | 6   | 0,073% | 0,076% | 0,144% |
| HTSR_1775 | hypothetical protein                                                         | 2  | 3   | 5   | 0,018% | 0,028% | 0,120% |
| HTSR_1776 | cobalt transport ATP-binding protein                                         | 5  | 3   | 11  | 0,045% | 0,028% | 0,263% |
| HTSR_1777 | cobalt transport ATP-binding protein                                         | 1  | 0   | 1   | 0,009% | 0,000% | 0,024% |
| HTSR_1778 | cobalt transport protein                                                     | 4  | 1   | 1   | 0,036% | 0,009% | 0,024% |
| HTSR_1780 | DNA-3-methyladenine glycosylase II                                           | 0  | 0   | 3   | 0,000% | 0,000% | 0,072% |
| HTSR_1781 | membrane protein                                                             | 0  | 1   | 0   | 0,000% | 0,009% | 0,000% |
| HTSR_1782 | replication factor A                                                         | 10 | 5   | 13  | 0,091% | 0,047% | 0,311% |
| HTSR_1783 | transcription factor CBF/NF-Y/histone domain-containing protein              | 8  | 9   | 7   | 0,073% | 0,085% | 0,168% |
| HTSR_1784 | tRNA nucleotidyltransferase (CCA-adding enzyme)                              | 15 | 25  | 24  | 0,136% | 0,236% | 0,574% |
| HTSR_1785 | ZIP family metal transporter                                                 | 0  | 0   | 0   | 0,000% | 0,000% | 0,000% |
| HTSR_1788 | hypothetical protein                                                         | 1  | 2   | 0   | 0,009% | 0,019% | 0,000% |
| HTSR_1789 | bacterio-opsin activator HTH domain-containing protein                       | 0  | 0   | 0   | 0,000% | 0,000% | 0,000% |
| HTSR_1790 | hydroxylamine reductase                                                      | 3  | 0   | 5   | 0,027% | 0,000% | 0,120% |
| HTSR_1791 | hypothetical protein / Formiminotetrahydrofolate cyclodeaminase (EC 4.3.1.4) | 0  | 0   | 0   | 0,000% | 0,000% | 0,000% |
| HTSR_1792 | IMP dehydrogenase                                                            | 9  | 9   | 7   | 0,082% | 0,085% | 0,168% |
| HTSR_1793 | 3,4-dihydroxy-2-butanone 4-phosphate synthase                                | 4  | 3   | 7   | 0,036% | 0,028% | 0,168% |
| HTSR_1794 | CTP-dependent riboflavin kinase                                              | 27 | 13  | 24  | 0,245% | 0,123% | 0,574% |
| HTSR_1795 | tRNA-modifying enzyme                                                        | 0  | 3   | 2   | 0,000% | 0,028% | 0,048% |
| HTSR_1796 | arginyl-tRNA synthetase                                                      | 19 | 25  | 21  | 0,172% | 0,236% | 0,503% |
| HTSR_1797 | septum site-determining protein MinD                                         | 3  | 0   | 7   | 0,027% | 0,000% | 0,168% |
| HTSR_1798 | phosphoesterase RecJ domain-containing protein                               | 1  | 3   | 7   | 0,009% | 0,028% | 0,168% |
| HTSR_1799 | peptide chain release factor 1                                               | 20 | 9   | 17  | 0,181% | 0,085% | 0,407% |
| HTSR_1800 | multi-sensor signal transduction histidine kinase                            | 8  | 38  | 24  | 0,073% | 0,359% | 0,574% |
| HTSR_1801 | hypothetical protein                                                         | 1  | 1   | 0   | 0,009% | 0,009% | 0,000% |
| HTSR_1802 | A-type ATP synthase subunit D                                                | 10 | 13  | 2   | 0,091% | 0,123% | 0,048% |
| HTSR_1803 | methionine synthase                                                          | 16 | 15  | 7   | 0,145% | 0,142% | 0,168% |
| HTSR_1804 | A-type ATP synthase subunit B                                                | 28 | 48  | 32  | 0,254% | 0,453% | 0,766% |
| HTSR_1805 | A-type ATP synthase subunit A                                                | 23 | 31  | 21  | 0,209% | 0,293% | 0,503% |
| HTSR_1806 | A-type ATP synthase subunit F                                                | 2  | 2   | 2   | 0,018% | 0,019% | 0,048% |
| HTSR_1807 | A-type ATP synthase subunit C                                                | 19 | 31  | 27  | 0,172% | 0,293% | 0,646% |
| HTSR_1808 | A-type ATP synthase subunit E                                                | 10 | 12  | 9   | 0,091% | 0,113% | 0,215% |
| HTSR_1809 | A-type ATP synthase subunit K                                                | 0  | 0   | 0   | 0,000% | 0,000% | 0,000% |
| HTSR_1810 | A-type ATP synthase subunit I                                                | 13 | 15  | 4   | 0,118% | 0,142% | 0,096% |
| HTSR_1811 | hypothetical protein                                                         | 12 | 9   | 4   | 0,109% | 0,085% | 0,096% |
| HTSR_1812 | SAM-dependent methyltransferase                                              | 7  | 17  | 19  | 0,064% | 0,161% | 0,455% |
| HTSR_1813 | hypothetical protein                                                         | 8  | 8   | 11  | 0,073% | 0,076% | 0,263% |
| HTSR_1814 | hypothetical protein                                                         | 6  | 5   | 4   | 0,054% | 0,047% | 0,096% |
| HTSR_1815 | electron transfer flavoprotein alpha/beta-subunit                            | 3  | 10  | 6   | 0,027% | 0,094% | 0,144% |
| HTSR_1816 | electron transfer flavoprotein alpha subunit                                 | 2  | 5   | 4   | 0,018% | 0,047% | 0,096% |
| HTSR_1817 | geranylgeranyl diphosphate synthase, type I                                  | 2  | 0   | 2   | 0,018% | 0,000% | 0,048% |
| HTSR_1818 | hypothetical protein                                                         | 5  | 10  | 8   | 0,045% | 0,094% | 0,191% |
| HTSR_1819 | radical SAM protein                                                          | 1  | 0   | 1   | 0,009% | 0,000% | 0,024% |
| HTSR_1820 | circadian clock protein, KaiC                                                | 3  | 7   | 9   | 0,027% | 0,066% | 0,215% |
| HTSR_1821 | NAD+ kinase                                                                  | 2  | 8   | 4   | 0,018% | 0,076% | 0,096% |
| HTSR_1822 | GTP cyclohydrolase I                                                         | 27 | 19  | 34  | 0,245% | 0,179% | 0,814% |
| HTSR_1823 | phage T7 F exclusion suppressor FxsA                                         | 1  | 1   | 0   | 0,009% | 0,009% | 0,000% |
| HTSR_1825 | cytotoxic translational repressor of toxin-antitoxin stability system        | 1  | 0   | 0   | 0,009% | 0,000% | 0,000% |
| HTSR_1826 | CopG family transcriptional regulator                                        | 1  | 0   | 1   | 0,009% | 0,000% | 0,024% |
| HTSR_1827 | hypothetical protein                                                         | 0  | 0   | 0   | 0,000% | 0,000% | 0,000% |
| HTSR_1828 | poly(3-hydroxyalkanoate) polymerase subunit PhaC                             | 9  | 4   | 3   | 0,082% | 0,038% | 0,072% |

|           |                                                                               |    |    |    |        |        |        |
|-----------|-------------------------------------------------------------------------------|----|----|----|--------|--------|--------|
| HTSR_1829 | hypothetical protein                                                          | 0  | 0  | 0  | 0,000% | 0,000% | 0,000% |
| HTSR_1830 | 2,3-bisphosphoglycerate-independent phosphoglycerate mutase                   | 7  | 7  | 3  | 0,064% | 0,066% | 0,072% |
| HTSR_1831 | amidohydrolase                                                                | 3  | 8  | 11 | 0,027% | 0,076% | 0,263% |
| HTSR_1832 | replication protein H                                                         | 0  | 0  | 0  | 0,000% | 0,000% | 0,000% |
| HTSR_1833 | cobyrinic acid a,c-diamide synthase                                           | 2  | 0  | 1  | 0,018% | 0,000% | 0,024% |
| HTSR_1834 | precorrin-2 dehydrogenase / sirohdrochlorin ferrochelatase                    | 0  | 0  | 0  | 0,000% | 0,000% | 0,000% |
| HTSR_1835 | uroporphyrin-III C-methyltransferase                                          | 0  | 0  | 0  | 0,000% | 0,000% | 0,000% |
| HTSR_1836 | cobalt transport protein CbiM                                                 | 0  | 0  | 0  | 0,000% | 0,000% | 0,000% |
| HTSR_1837 | cobalt transport protein CbiN                                                 | 0  | 0  | 0  | 0,000% | 0,000% | 0,000% |
| HTSR_1838 | cobalt ECF transporter T component CbiQ                                       | 0  | 0  | 0  | 0,000% | 0,000% | 0,000% |
| HTSR_1839 | cobalt ABC transporter ATP-binding protein                                    | 0  | 0  | 0  | 0,000% | 0,000% | 0,000% |
| HTSR_1840 | precorrin-6Y C5,15-methyltransferase (decarboxylating) subunit CbiT           | 1  | 1  | 1  | 0,009% | 0,009% | 0,024% |
| HTSR_1841 | precorrin-2/cobalt-factor-2 C20-methyltransferase                             | 0  | 0  | 0  | 0,000% | 0,000% | 0,000% |
| HTSR_1842 | precorrin-4/cobalt-precorrin-4 C11-methyltransferase                          | 4  | 0  | 0  | 0,036% | 0,000% | 0,000% |
| HTSR_1843 | cobalamin biosynthesis protein CbiG                                           | 1  | 2  | 0  | 0,009% | 0,019% | 0,000% |
| HTSR_1844 | cobalt-precorrin-2 C(20)-methyltransferase                                    | 0  | 0  | 0  | 0,000% | 0,000% | 0,000% |
| HTSR_1845 | precorrin-3B C17-methyltransferase                                            | 4  | 0  | 1  | 0,036% | 0,000% | 0,024% |
| HTSR_1846 | cobalamin (vitamin B12) biosynthesis CbiX protein                             | 14 | 15 | 3  | 0,127% | 0,142% | 0,072% |
| HTSR_1847 | Mg-chelatase subunit ChlI                                                     | 19 | 13 | 0  | 0,172% | 0,123% | 0,000% |
| HTSR_1848 | cobaltochelate subunit CobN                                                   | 13 | 10 | 0  | 0,118% | 0,094% | 0,000% |
| HTSR_1849 | precorrin-8X/cobalt-precorrin-8 methylmutase                                  | 8  | 5  | 0  | 0,073% | 0,047% | 0,000% |
| HTSR_1850 | cobalt-precorrin-6Y C(5)-methyltransferase                                    | 5  | 0  | 0  | 0,045% | 0,000% | 0,000% |
| HTSR_1851 | ABC-type nitrate/sulfonate/bicarbonate transportsystem, periplasmic component | 9  | 8  | 1  | 0,082% | 0,076% | 0,024% |
| HTSR_1852 | ABC-type nitrate/sulfonate/bicarbonate transportsystem, permease component    | 2  | 0  | 0  | 0,018% | 0,000% | 0,000% |
| HTSR_1853 | ABC-type nitrate/sulfonate/bicarbonate transportsystem, ATPase component      | 2  | 0  | 0  | 0,018% | 0,000% | 0,000% |
| HTSR_1854 | cupin                                                                         | 1  | 2  | 0  | 0,009% | 0,019% | 0,000% |
| HTSR_1855 | isocitrate dehydrogenase                                                      | 25 | 21 | 19 | 0,227% | 0,198% | 0,455% |
| HTSR_1856 | asparaginase                                                                  | 1  | 4  | 1  | 0,009% | 0,038% | 0,024% |
| HTSR_1857 | methionyl aminopeptidase                                                      | 6  | 12 | 11 | 0,054% | 0,113% | 0,263% |
| HTSR_1858 | HIT family hydrolase, diadenosine tetraphosphatehydrolase                     | 8  | 7  | 2  | 0,073% | 0,066% | 0,048% |
| HTSR_1859 | hypothetical protein                                                          | 1  | 1  | 0  | 0,009% | 0,009% | 0,000% |
| HTSR_1860 | hypothetical protein                                                          | 9  | 8  | 6  | 0,082% | 0,076% | 0,144% |
| HTSR_1861 | MiaB-like tRNA modifying enzyme                                               | 0  | 0  | 2  | 0,000% | 0,000% | 0,048% |
| HTSR_1862 | deoxyribose-phosphate aldolase                                                | 8  | 9  | 3  | 0,073% | 0,085% | 0,072% |
| HTSR_1863 | hypothetical protein                                                          | 1  | 3  | 2  | 0,009% | 0,028% | 0,048% |
| HTSR_1864 | translation initiation factor IF-2B subunit delta                             | 7  | 18 | 11 | 0,064% | 0,170% | 0,263% |
| HTSR_1865 | hypothetical protein                                                          | 0  | 0  | 1  | 0,000% | 0,000% | 0,024% |
| HTSR_1866 | ribokinase                                                                    | 0  | 4  | 1  | 0,000% | 0,038% | 0,024% |
| HTSR_1867 | uridine phosphorylase                                                         | 13 | 4  | 6  | 0,118% | 0,038% | 0,144% |
| HTSR_1868 | GCN5-related N-acetyltransferase                                              | 8  | 6  | 6  | 0,073% | 0,057% | 0,144% |
| HTSR_1869 | glutamyl-tRNA(Gln) amidotransferase subunit D                                 | 12 | 25 | 8  | 0,109% | 0,236% | 0,191% |
| HTSR_1870 | ArsR family transcriptional regulator                                         | 8  | 14 | 14 | 0,073% | 0,132% | 0,335% |
| HTSR_1871 | hypothetical protein                                                          | 0  | 0  | 0  | 0,000% | 0,000% | 0,000% |
| HTSR_1872 | peptide-methionine (R)-S-oxide reductase                                      | 2  | 1  | 1  | 0,018% | 0,009% | 0,024% |
| HTSR_1873 | transcriptional regulator                                                     | 4  | 0  | 7  | 0,036% | 0,000% | 0,168% |
| HTSR_1874 | tRNA(Ile2) 2-agsmatinylcytidine synthetase                                    | 0  | 11 | 13 | 0,000% | 0,104% | 0,311% |
| HTSR_1875 | hypothetical protein                                                          | 0  | 0  | 0  | 0,000% | 0,000% | 0,000% |
| HTSR_1876 | threonine synthase                                                            | 1  | 5  | 10 | 0,009% | 0,047% | 0,239% |
| HTSR_1877 | succinylglutamate desuccinylase/aspartoacylase                                | 3  | 5  | 7  | 0,027% | 0,047% | 0,168% |
| HTSR_1878 | potassium channel protein                                                     | 17 | 23 | 17 | 0,154% | 0,217% | 0,407% |
| HTSR_1879 | citrate synthase                                                              | 10 | 15 | 13 | 0,091% | 0,142% | 0,311% |
| HTSR_1880 | threonine dehydratase                                                         | 21 | 12 | 23 | 0,191% | 0,113% | 0,551% |
| HTSR_1881 | endoribonuclease L-PSP                                                        | 6  | 9  | 2  | 0,054% | 0,085% | 0,048% |
| HTSR_1882 | hypothetical protein                                                          | 1  | 0  | 0  | 0,009% | 0,000% | 0,000% |
| HTSR_1884 | thermosome subunit beta                                                       | 32 | 26 | 30 | 0,290% | 0,246% | 0,718% |
| HTSR_1885 | cytotoxic translational repressor of toxin-antitoxin stability system         | 0  | 0  | 0  | 0,000% | 0,000% | 0,000% |
| HTSR_1886 | CopG family transcriptional regulator                                         | 0  | 0  | 0  | 0,000% | 0,000% | 0,000% |
| HTSR_1887 | AsnC family transcriptional regulator                                         | 2  | 6  | 2  | 0,018% | 0,057% | 0,048% |
| HTSR_1888 | glutamine synthetase                                                          | 27 | 88 | 19 | 0,245% | 0,831% | 0,455% |
| HTSR_1889 | hypothetical protein                                                          | 3  | 3  | 1  | 0,027% | 0,028% | 0,024% |
| HTSR_1890 | hypothetical protein                                                          | 0  | 0  | 0  | 0,000% | 0,000% | 0,000% |
| HTSR_1891 | ribonuclease BN                                                               | 2  | 2  | 2  | 0,018% | 0,019% | 0,048% |
| HTSR_1892 | tRNA (guanine26-N2/guanine27-N2)-dimethyltransferase                          | 6  | 8  | 13 | 0,054% | 0,076% | 0,311% |
| HTSR_1893 | zinc finger SWIM domain protein                                               | 0  | 0  | 0  | 0,000% | 0,000% | 0,000% |
| HTSR_1894 | imidazole glycerol phosphate synthase subunit HisH                            | 2  | 1  | 1  | 0,018% | 0,009% | 0,024% |
| HTSR_1895 | uracil-DNA glycosylase, family 4                                              | 5  | 2  | 0  | 0,045% | 0,019% | 0,000% |
| HTSR_1896 | hypothetical protein                                                          | 3  | 2  | 2  | 0,027% | 0,019% | 0,048% |
| HTSR_1897 | death domain-associated protein                                               | 0  | 0  | 0  | 0,000% | 0,000% | 0,000% |
| HTSR_1898 | hydroxyacylglutathione hydrolase                                              | 0  | 0  | 1  | 0,000% | 0,000% | 0,024% |
| HTSR_1899 | 50S ribosomal protein L40e                                                    | 3  | 2  | 4  | 0,027% | 0,019% | 0,096% |
| HTSR_1900 | hypothetical protein                                                          | 6  | 4  | 4  | 0,054% | 0,038% | 0,096% |
| HTSR_1901 | hypothetical protein                                                          | 0  | 2  | 2  | 0,000% | 0,019% | 0,048% |
| HTSR_1902 | bile acid:sodium symporter                                                    | 1  | 1  | 1  | 0,009% | 0,009% | 0,024% |
| HTSR_1903 | seryl-tRNA synthetase                                                         | 27 | 33 | 17 | 0,245% | 0,312% | 0,407% |
| HTSR_1904 | histidine kinase                                                              | 1  | 14 | 6  | 0,009% | 0,132% | 0,144% |
| HTSR_1905 | hypothetical protein                                                          | 8  | 10 | 10 | 0,073% | 0,094% | 0,239% |
| HTSR_1906 | hypothetical protein                                                          | 5  | 17 | 7  | 0,045% | 0,161% | 0,168% |
| HTSR_1907 | membrane-bound mannosyltransferase                                            | 0  | 2  | 0  | 0,000% | 0,019% | 0,000% |
| HTSR_1908 | ATPase AAA                                                                    | 20 | 27 | 21 | 0,181% | 0,255% | 0,503% |
| HTSR_1909 | ATP-binding protein                                                           | 0  | 0  | 2  | 0,000% | 0,000% | 0,048% |
| HTSR_1910 | hypothetical protein                                                          | 0  | 1  | 0  | 0,000% | 0,009% | 0,000% |
| HTSR_1911 | hypothetical protein                                                          | 0  | 1  | 4  | 0,000% | 0,009% | 0,096% |
| HTSR_1912 | hypothetical protein                                                          | 2  | 4  | 3  | 0,018% | 0,038% | 0,072% |
| HTSR_1913 | translation initiation factor IF-2 subunit gamma                              | 11 | 19 | 17 | 0,100% | 0,179% | 0,407% |
| HTSR_1914 | RNA-binding protein                                                           | 0  | 0  | 0  | 0,000% | 0,000% | 0,000% |
| HTSR_1915 | DNA-directed RNA polymerase subunit E'                                        | 5  | 5  | 2  | 0,045% | 0,047% | 0,048% |
| HTSR_1916 | DNA-directed RNA polymerase subunit E"                                        | 1  | 1  | 0  | 0,009% | 0,009% | 0,000% |
| HTSR_1917 | hypothetical protein                                                          | 0  | 0  | 0  | 0,000% | 0,000% | 0,000% |
| HTSR_1918 | 30S ribosomal protein S24e                                                    | 12 | 2  | 7  | 0,109% | 0,019% | 0,168% |
| HTSR_1919 | 30S ribosomal protein S27ae                                                   | 0  | 0  | 2  | 0,000% | 0,000% | 0,048% |
| HTSR_1920 | bifunctional UGMP family protein/serine/threonine protein kinase              | 3  | 0  | 2  | 0,027% | 0,000% | 0,048% |
| HTSR_1921 | hypothetical protein                                                          | 5  | 10 | 5  | 0,045% | 0,094% | 0,120% |
| HTSR_1922 | deoxyribonucleotide triphosphate pyrophosphatase                              | 3  | 5  | 6  | 0,027% | 0,047% | 0,144% |
| HTSR_1923 | hypothetical protein                                                          | 5  | 2  | 4  | 0,045% | 0,019% | 0,096% |
| HTSR_1924 | phosphate ABC transporter ATP-binding protein                                 | 0  | 0  | 1  | 0,000% | 0,000% | 0,024% |
| HTSR_1925 | ABC-type tungstate transport system, periplasmic component                    | 0  | 0  | 1  | 0,000% | 0,000% | 0,024% |
| HTSR_1926 | ABC-type tungstate transport system, permease component                       | 1  | 0  | 0  | 0,009% | 0,000% | 0,000% |
| HTSR_1927 | molybdenum-binding protein                                                    | 5  | 14 | 12 | 0,045% | 0,132% | 0,287% |
| HTSR_1928 | phosphate ABC transporter, substrate-binding protein                          | 16 | 13 | 17 | 0,145% | 0,123% | 0,407% |
| HTSR_1929 | phosphate ABC transporter, permease protein PstC                              | 1  | 2  | 1  | 0,009% | 0,019% | 0,024% |
| HTSR_1930 | phosphate ABC transporter, permease protein PstA                              | 2  | 6  | 1  | 0,018% | 0,057% | 0,024% |
| HTSR_1931 | phosphate ABC transporter, ATP-binding protein                                | 9  | 18 | 8  | 0,082% | 0,170% | 0,191% |
| HTSR_1932 | hypothetical protein                                                          | 1  | 0  | 1  | 0,009% | 0,000% | 0,024% |
| HTSR_1933 | glyoxalase/bleomycin resistance protein/dioxygenase                           | 3  | 12 | 3  | 0,027% | 0,113% | 0,072% |
| HTSR_1934 | phospholipase/carboxylesterase                                                | 1  | 1  | 1  | 0,009% | 0,009% | 0,024% |

|           |                                                                                |    |     |    |        |        |        |
|-----------|--------------------------------------------------------------------------------|----|-----|----|--------|--------|--------|
| HTSR_1935 | metal-dependent hydrolase                                                      | 0  | 0   | 0  | 0,000% | 0,000% | 0,000% |
| HTSR_1936 | potassium transporter TrkA                                                     | 0  | 7   | 4  | 0,000% | 0,066% | 0,096% |
| HTSR_1937 | potassium transporter TrkA                                                     | 0  | 7   | 2  | 0,000% | 0,066% | 0,048% |
| HTSR_1938 | potassium channel protein                                                      | 1  | 4   | 3  | 0,009% | 0,038% | 0,072% |
| HTSR_1940 | hypothetical protein                                                           | 1  | 1   | 2  | 0,009% | 0,009% | 0,048% |
| HTSR_1941 | NAD+ synthase                                                                  | 7  | 7   | 5  | 0,064% | 0,066% | 0,120% |
| HTSR_1943 | hypothetical protein                                                           | 1  | 1   | 8  | 0,009% | 0,009% | 0,191% |
| HTSR_1944 | translation initiation factor Sui1                                             | 1  | 4   | 1  | 0,009% | 0,038% | 0,024% |
| HTSR_1945 | bacterio-opsin activator                                                       | 7  | 17  | 10 | 0,064% | 0,161% | 0,239% |
| HTSR_1946 | hypothetical protein                                                           | 0  | 1   | 0  | 0,000% | 0,009% | 0,000% |
| HTSR_1947 | metalloprotease/metallo peptidase                                              | 0  | 1   | 1  | 0,000% | 0,009% | 0,024% |
| HTSR_1948 | protein of unknown function DUF502                                             | 0  | 5   | 6  | 0,000% | 0,047% | 0,144% |
| HTSR_1949 | lysyl-tRNA synthetase, class I                                                 | 9  | 8   | 13 | 0,082% | 0,076% | 0,311% |
| HTSR_1950 | uridylylase                                                                    | 1  | 4   | 2  | 0,009% | 0,038% | 0,048% |
| HTSR_1951 | bifunctional molybdopterin-guanine dinucleotide biosynthesis protein MobB/MoaE | 9  | 10  | 3  | 0,082% | 0,094% | 0,072% |
| HTSR_1952 | hypothetical protein                                                           | 0  | 0   | 0  | 0,000% | 0,000% | 0,000% |
| HTSR_1953 | ADP-ribose pyrophosphatase                                                     | 4  | 1   | 2  | 0,036% | 0,009% | 0,048% |
| HTSR_1954 | queuine/archaeosine tRNA-ribosyltransferase                                    | 11 | 12  | 15 | 0,100% | 0,113% | 0,359% |
| HTSR_1955 | archaeosine tRNA-guanine transglycosylase                                      | 10 | 19  | 22 | 0,091% | 0,179% | 0,527% |
| HTSR_1956 | hypothetical protein                                                           | 7  | 6   | 6  | 0,064% | 0,057% | 0,144% |
| HTSR_1957 | hypothetical protein                                                           | 6  | 4   | 4  | 0,054% | 0,038% | 0,096% |
| HTSR_1958 | MoaD family protein                                                            | 3  | 0   | 2  | 0,027% | 0,000% | 0,048% |
| HTSR_1959 | hypothetical protein                                                           | 1  | 0   | 0  | 0,009% | 0,000% | 0,000% |
| HTSR_1960 | hypothetical protein                                                           | 0  | 0   | 0  | 0,000% | 0,000% | 0,000% |
| HTSR_1961 | 3-methyl-2-oxobutanoate hydroxymethyltransferase                               | 14 | 6   | 7  | 0,127% | 0,057% | 0,168% |
| HTSR_1962 | aldehyde ferredoxin oxidoreductase                                             | 70 | 120 | 52 | 0,635% | 1,134% | 1,245% |
| HTSR_1963 | elongator protein 3/MiaB/NiB                                                   | 2  | 7   | 8  | 0,018% | 0,066% | 0,191% |
| HTSR_1964 | hypothetical protein                                                           | 0  | 0   | 0  | 0,000% | 0,000% | 0,000% |
| HTSR_1965 | phosphoribosylformylglycinamide synthase                                       | 7  | 7   | 6  | 0,064% | 0,066% | 0,144% |
| HTSR_1966 | phosphoribosylformylglycinamide synthase                                       | 6  | 6   | 6  | 0,054% | 0,057% | 0,144% |
| HTSR_1967 | phosphoribosylaminoimidazole-succinocarboxamide synthase                       | 9  | 23  | 9  | 0,082% | 0,217% | 0,215% |
| HTSR_1968 | 7,8-didemethyl-8-hydroxy-5-deazariboflavin synthase subunit CofH               | 0  | 0   | 2  | 0,000% | 0,000% | 0,048% |
| HTSR_1969 | 7,8-didemethyl-8-hydroxy-5-deazariboflavin synthase subunit CofG               | 0  | 0   | 0  | 0,000% | 0,000% | 0,000% |
| HTSR_1970 | 2-phospho-L-lactate guanylyltransferase                                        | 0  | 0   | 0  | 0,000% | 0,000% | 0,000% |
| HTSR_1971 | hypothetical protein                                                           | 15 | 9   | 12 | 0,136% | 0,085% | 0,287% |
| HTSR_1972 | cell division GTPase FtsZ                                                      | 15 | 19  | 30 | 0,136% | 0,179% | 0,718% |
| HTSR_1973 | NAD-dependent epimerase/dehydratase                                            | 5  | 11  | 5  | 0,045% | 0,104% | 0,120% |
| HTSR_1974 | dTMP kinase                                                                    | 2  | 7   | 5  | 0,018% | 0,066% | 0,120% |
| HTSR_1975 | ArsR family transcriptional regulator                                          | 0  | 0   | 0  | 0,000% | 0,000% | 0,000% |
| HTSR_1976 | AsnC family transcriptional regulator                                          | 2  | 2   | 1  | 0,018% | 0,019% | 0,024% |
| HTSR_1977 | hypothetical protein                                                           | 2  | 2   | 0  | 0,018% | 0,019% | 0,000% |
| HTSR_1978 | universal stress protein UspA                                                  | 7  | 10  | 4  | 0,064% | 0,094% | 0,096% |
| HTSR_1979 | ATPase AAA                                                                     | 20 | 23  | 20 | 0,181% | 0,217% | 0,479% |
| HTSR_1980 | NurA domain-containing protein                                                 | 9  | 11  | 11 | 0,082% | 0,104% | 0,263% |
| HTSR_1981 | hypothetical protein                                                           | 0  | 0   | 0  | 0,000% | 0,000% | 0,000% |
| HTSR_1982 | transposase, IS605 OrfB family                                                 | 0  | 0   | 2  | 0,000% | 0,000% | 0,048% |
| HTSR_1983 | transcriptional regulator                                                      | 0  | 0   | 0  | 0,000% | 0,000% | 0,000% |
| HTSR_1984 | holliday junction resolvase                                                    | 1  | 1   | 1  | 0,009% | 0,009% | 0,024% |
| HTSR_1985 | DNA polymerase sliding clamp                                                   | 10 | 13  | 10 | 0,091% | 0,123% | 0,239% |
| HTSR_1986 | 23S rRNA methyltransferase J                                                   | 6  | 5   | 5  | 0,054% | 0,047% | 0,120% |
| HTSR_1987 | integral membrane protein                                                      | 1  | 2   | 1  | 0,009% | 0,019% | 0,024% |
| HTSR_1988 | CopG family transcriptional regulator                                          | 0  | 1   | 0  | 0,000% | 0,009% | 0,000% |
| HTSR_1989 | hypothetical protein                                                           | 0  | 0   | 1  | 0,000% | 0,000% | 0,024% |
| HTSR_1990 | preprotein translocase subunit TatC                                            | 2  | 6   | 2  | 0,018% | 0,057% | 0,048% |
| HTSR_1991 | preprotein translocase subunit TatC                                            | 0  | 0   | 1  | 0,000% | 0,000% | 0,024% |
| HTSR_1992 | DNA mismatch repair protein MutS                                               | 9  | 29  | 26 | 0,082% | 0,274% | 0,622% |
| HTSR_1993 | Na+-dependent transporter, SNF family                                          | 0  | 0   | 0  | 0,000% | 0,000% | 0,000% |
| HTSR_1994 | hypothetical protein                                                           | 0  | 0   | 2  | 0,000% | 0,000% | 0,048% |
| HTSR_1995 | cell division control protein 6                                                | 2  | 15  | 9  | 0,018% | 0,142% | 0,215% |
| HTSR_1996 | peptidyl-prolyl cis-trans isomerase A (cyclophilin A)                          | 13 | 13  | 5  | 0,118% | 0,123% | 0,120% |
| HTSR_1998 | hypothetical protein                                                           | 0  | 0   | 0  | 0,000% | 0,000% | 0,000% |
| HTSR_1999 | phosphoribosylamine-glycine ligase                                             | 0  | 12  | 4  | 0,000% | 0,113% | 0,096% |
| HTSR_2000 | hypothetical protein                                                           | 0  | 1   | 1  | 0,000% | 0,009% | 0,024% |
| HTSR_2001 | DNA primase large subunit                                                      | 9  | 10  | 10 | 0,082% | 0,094% | 0,239% |
| HTSR_2002 | phosphatidylserine decarboxylase                                               | 2  | 4   | 5  | 0,018% | 0,038% | 0,120% |
| HTSR_2003 | ribose 5-phosphate isomerase A                                                 | 3  | 5   | 3  | 0,027% | 0,047% | 0,072% |
| HTSR_2004 | DNA-binding protein                                                            | 4  | 6   | 4  | 0,036% | 0,057% | 0,096% |
| HTSR_2005 | phosphomannomutase / phosphoglucomutase                                        | 19 | 34  | 27 | 0,172% | 0,321% | 0,646% |
| HTSR_2006 | mechanosensitive ion channel protein MscS                                      | 1  | 2   | 2  | 0,009% | 0,019% | 0,048% |
| HTSR_2007 | acetyltransferase                                                              | 0  | 0   | 0  | 0,000% | 0,000% | 0,000% |
| HTSR_2008 | hypothetical protein / Ubiquitin-like small archaeal modifier protein SAMP2    | 0  | 0   | 0  | 0,000% | 0,000% | 0,000% |
| HTSR_2009 | hypothetical protein                                                           | 0  | 3   | 0  | 0,000% | 0,028% | 0,000% |
| HTSR_2010 | replication factor C small subunit                                             | 10 | 11  | 10 | 0,091% | 0,104% | 0,239% |
| HTSR_2011 | alanyl-tRNA synthetase                                                         | 31 | 34  | 24 | 0,281% | 0,321% | 0,574% |
| HTSR_2012 | hypothetical protein                                                           | 0  | 0   | 0  | 0,000% | 0,000% | 0,000% |
| HTSR_2013 | PHP domain-containing protein                                                  | 0  | 0   | 1  | 0,000% | 0,000% | 0,024% |
| HTSR_2014 | hypothetical protein                                                           | 0  | 0   | 0  | 0,000% | 0,000% | 0,000% |
| HTSR_2015 | hypothetical protein                                                           | 0  | 0   | 0  | 0,000% | 0,000% | 0,000% |
| HTSR_2016 | methyltransferase                                                              | 0  | 1   | 2  | 0,000% | 0,009% | 0,048% |
| HTSR_2017 | NMD3 family protein                                                            | 2  | 4   | 12 | 0,018% | 0,038% | 0,287% |
| HTSR_2018 | heat shock protein HtpX                                                        | 5  | 2   | 3  | 0,045% | 0,019% | 0,072% |
| HTSR_2019 | hypothetical protein                                                           | 1  | 2   | 1  | 0,009% | 0,019% | 0,024% |
| HTSR_2020 | DNA repair and recombination protein RadA                                      | 16 | 11  | 26 | 0,145% | 0,104% | 0,622% |
| HTSR_2021 | hypothetical protein                                                           | 3  | 8   | 3  | 0,027% | 0,076% | 0,072% |
| HTSR_2022 | SirA family protein                                                            | 1  | 1   | 0  | 0,009% | 0,009% | 0,000% |
| HTSR_2023 | NADPH-dependent 2,4-dienoyl-CoA reductase                                      | 14 | 18  | 11 | 0,127% | 0,170% | 0,263% |
| HTSR_2024 | hypothetical protein                                                           | 0  | 1   | 1  | 0,000% | 0,009% | 0,024% |
| HTSR_2025 | iron-sulfur cluster scaffold-like protein                                      | 2  | 0   | 2  | 0,018% | 0,000% | 0,048% |
| HTSR_2026 | cysteine desulfurase                                                           | 22 | 21  | 20 | 0,200% | 0,198% | 0,479% |
| HTSR_2027 | hypothetical protein                                                           | 4  | 5   | 7  | 0,036% | 0,047% | 0,168% |
| HTSR_2028 | hypothetical protein                                                           | 1  | 1   | 1  | 0,009% | 0,009% | 0,024% |
| HTSR_2029 | hypothetical protein                                                           | 0  | 0   | 0  | 0,000% | 0,000% | 0,000% |
| HTSR_2030 | tetratricopeptide repeat protein                                               | 10 | 0   | 8  | 0,091% | 0,000% | 0,191% |
| HTSR_2031 | 2'-5' RNA ligase                                                               | 1  | 3   | 4  | 0,009% | 0,028% | 0,096% |
| HTSR_2032 | 50S ribosomal protein L39e                                                     | 0  | 0   | 2  | 0,000% | 0,000% | 0,048% |
| HTSR_2033 | 50S ribosomal protein L31e                                                     | 4  | 7   | 8  | 0,036% | 0,066% | 0,191% |
| HTSR_2034 | translation initiation factor IF-6                                             | 4  | 4   | 5  | 0,036% | 0,038% | 0,120% |
| HTSR_2035 | prefoldin subunit alpha                                                        | 7  | 4   | 0  | 0,064% | 0,038% | 0,000% |
| HTSR_2036 | signal recognition particle-docking protein FtsY                               | 5  | 3   | 0  | 0,045% | 0,028% | 0,000% |
| HTSR_2037 | hypothetical protein                                                           | 2  | 3   | 0  | 0,018% | 0,028% | 0,000% |
| HTSR_2038 | hypothetical protein                                                           | 0  | 0   | 0  | 0,000% | 0,000% | 0,000% |
| HTSR_2039 | signal recognition particle protein Srp54                                      | 24 | 15  | 14 | 0,218% | 0,142% | 0,335% |
| HTSR_2040 | MgtE integral membrane region                                                  | 1  | 1   | 1  | 0,009% | 0,009% | 0,024% |
| HTSR_2041 | divalent cation transporter                                                    | 0  | 0   | 0  | 0,000% | 0,000% | 0,000% |
| HTSR_2042 | dephospho-CoA kinase-like protein                                              | 25 | 23  | 14 | 0,227% | 0,217% | 0,335% |

|                           |                                           |              |              |             |                 |                 |                 |
|---------------------------|-------------------------------------------|--------------|--------------|-------------|-----------------|-----------------|-----------------|
| HTSR_2044                 | hypothetical protein                      | 0            | 0            | 0           | 0,000%          | 0,000%          | 0,000%          |
| HTSR_2045                 | hypothetical protein                      | 0            | 0            | 0           | 0,000%          | 0,000%          | 0,000%          |
| HTSR_2046                 | amphi-Trp domain-containing protein       | 5            | 5            | 4           | 0,045%          | 0,047%          | 0,096%          |
| HTSR_2047                 | small CPxCG-related zinc finger protein   | 0            | 0            | 0           | 0,000%          | 0,000%          | 0,000%          |
| HTSR_2048                 | OsmC family protein                       | 1            | 2            | 2           | 0,009%          | 0,019%          | 0,048%          |
| HTSR_2049                 | threonine aldolase                        | 15           | 20           | 8           | 0,136%          | 0,189%          | 0,191%          |
| HTSR_2050                 | phosphoesterase                           | 0            | 0            | 8           | 0,000%          | 0,000%          | 0,191%          |
| HTSR_2051                 | DEAD/DEAH box helicase                    | 9            | 19           | 12          | 0,082%          | 0,179%          | 0,287%          |
| HTSR_2052                 | phosphoesterase                           | 4            | 0            | 2           | 0,036%          | 0,000%          | 0,048%          |
| HTSR_2053                 | hypothetical protein                      | 0            | 0            | 0           | 0,000%          | 0,000%          | 0,000%          |
| HTSR_2054                 | argininosuccinate synthase                | 10           | 19           | 12          | 0,091%          | 0,179%          | 0,287%          |
| HTSR_2055                 | argininosuccinate lyase                   | 24           | 25           | 13          | 0,218%          | 0,236%          | 0,311%          |
| HTSR_2056                 | lysine biosynthesis protein LysW          | 0            | 1            | 0           | 0,000%          | 0,009%          | 0,000%          |
| HTSR_2057                 | lysine biosynthesis enzyme LysX           | 10           | 10           | 19          | 0,091%          | 0,094%          | 0,455%          |
| HTSR_2058                 | threonine synthase                        | 13           | 20           | 13          | 0,118%          | 0,189%          | 0,311%          |
| HTSR_2059                 | homoserine O-acetyltransferase            | 0            | 1            | 9           | 0,000%          | 0,009%          | 0,215%          |
| HTSR_2060                 | two-component sensor histidine kinase     | 0            | 0            | 4           | 0,000%          | 0,000%          | 0,096%          |
| HTSR_2061                 | DNA ligase (NAD+)                         | 13           | 26           | 17          | 0,118%          | 0,246%          | 0,407%          |
| HTSR_2062                 | hypothetical protein                      | 0            | 0            | 5           | 0,000%          | 0,000%          | 0,120%          |
| HTSR_2063                 | excinuclease ABC subunit C                | 0            | 0            | 3           | 0,000%          | 0,000%          | 0,072%          |
| HTSR_2064                 | antibiotic biosynthesis monooxygenase     | 0            | 0            | 0           | 0,000%          | 0,000%          | 0,000%          |
| HTSR_2065                 | excinuclease ABC subunit B                | 1            | 2            | 5           | 0,009%          | 0,019%          | 0,120%          |
| HTSR_2066                 | permease                                  | 0            | 0            | 1           | 0,000%          | 0,000%          | 0,024%          |
| HTSR_2067                 | ABC transporter substrate-binding protein | 1            | 4            | 1           | 0,009%          | 0,038%          | 0,024%          |
| HTSR_2068                 | ABC transporter permease                  | 0            | 0            | 0           | 0,000%          | 0,000%          | 0,000%          |
| HTSR_2069                 | ABC transporter ATP-binding protein       | 0            | 0            | 2           | 0,000%          | 0,000%          | 0,048%          |
| HTSR_2070                 | SAM-dependent methyltransferase           | 5            | 4            | 3           | 0,045%          | 0,038%          | 0,072%          |
| HTSR_2071                 | ATPase involved in flagella biogenesis    | 6            | 2            | 3           | 0,054%          | 0,019%          | 0,072%          |
| HTSR_2072                 | Zn-ribbon containing protein (DUF2072)    | 0            | 0            | 1           | 0,000%          | 0,000%          | 0,024%          |
| HTSR_2073                 | hypothetical protein                      | 2            | 0            | 2           | 0,018%          | 0,000%          | 0,048%          |
| HTSR_2074                 | small GTP-binding protein                 | 13           | 0            | 19          | 0,118%          | 0,000%          | 0,455%          |
| <b>TOTAL NO. PEPTIDES</b> |                                           | <b>11021</b> | <b>10585</b> | <b>4178</b> | <b>100,000%</b> | <b>100,000%</b> | <b>100,000%</b> |
